# Supplementary material for: Targeted simplification versus antipseudomonal broad-spectrum beta-lactams in patients with bloodstream infections due to Enterobacteriaceae (SIMPLIFY): a study protocol for a multicentre, open-label, phase III randomised, controlled, non-inferiority clinical trial
Source: PubMed Central journal article supplement — BMJ Open. 2017 Jun 9;7(6):e015439. doi: 10.1136/bmjopen-2016-015439 (PMC5734512; doi:10.1136/bmjopen-2016-015439), 2017-06-09
Supplement: bmjopen-2016-015439.draft_revisions.pdf [file bmjopen-2016-015439.draft_revisions.pdf]

# BMJ Open

## Targeted simplification versus antipseudomonal broad-spectrum beta-lactams in patients with bloodstream infections due to Enterobacteriaceae (SIMPLIFY): a study protocol for a multicenter, open-label, phase III randomized, controlled, non-inferiority clinical trial

|                                 |                                                                                                                                                                                                                                                                                                                                                                                                                                                                                                                                                                                                                                                                                                                                                                                                                                                                                                                                                                                                                                                                                                                                                                                      |
|---------------------------------|--------------------------------------------------------------------------------------------------------------------------------------------------------------------------------------------------------------------------------------------------------------------------------------------------------------------------------------------------------------------------------------------------------------------------------------------------------------------------------------------------------------------------------------------------------------------------------------------------------------------------------------------------------------------------------------------------------------------------------------------------------------------------------------------------------------------------------------------------------------------------------------------------------------------------------------------------------------------------------------------------------------------------------------------------------------------------------------------------------------------------------------------------------------------------------------|
| Journal:                        | <i>BMJ Open</i>                                                                                                                                                                                                                                                                                                                                                                                                                                                                                                                                                                                                                                                                                                                                                                                                                                                                                                                                                                                                                                                                                                                                                                      |
| Manuscript ID                   | bmjopen-2016-015439                                                                                                                                                                                                                                                                                                                                                                                                                                                                                                                                                                                                                                                                                                                                                                                                                                                                                                                                                                                                                                                                                                                                                                  |
| Article Type:                   | Protocol                                                                                                                                                                                                                                                                                                                                                                                                                                                                                                                                                                                                                                                                                                                                                                                                                                                                                                                                                                                                                                                                                                                                                                             |
| Date Submitted by the Author:   | 05-Dec-2016                                                                                                                                                                                                                                                                                                                                                                                                                                                                                                                                                                                                                                                                                                                                                                                                                                                                                                                                                                                                                                                                                                                                                                          |
| Complete List of Authors:       | López-Cortés, Luis Eduardo; Hospital Universitario Virgen Macarena, Enfermedades Infecciosas y Microbiología Clínica<br>Rosso-Fernández, Clara; Hospital Universitario Virgen del Rocío, Unidad de Ensayos clínicos; Hospital Universitario Virgen del Rocío, Farmacología Clínica<br>Núñez-Núñez, María; University Hospital Virgen Macarena-Virgen del Rocío, Unit of Infectious Disease, Microbiology, and Preventive Medicine<br>Lavín-Alconero, Lucía; Hospital Universitario Virgen del Rocío, Unidad de ensayos clínicos<br>Bravo-Ferrer, José; Hospitales Universitarios Virgen Macarena y Virgen del Rocío, Unidad de Gestión Clínica de Enfermedades Infecciosas, Microbiología y Medicina Preventiva<br>Barriga, Ángel; Hospital Universitario Virgen del Rocío, Unidad de ensayos clínicos<br>Delgado, Mercedes; Hospital Universitario Virgen Macarena, Microbiología Clínica<br>Lupión, Carmen; Hospital Universitario Virgen Macarena, Enfermedades Infecciosas y Microbiología Clínica<br>Retamar, Pilar; Hospital Universitario Virgen Macarena, Enfermedades Infecciosas y Microbiología Clínica<br>Rodríguez-Baño, Jesús; Hospital Universitario Virgen Macarena, |
| <b>Primary Subject Heading</b>: | Infectious diseases                                                                                                                                                                                                                                                                                                                                                                                                                                                                                                                                                                                                                                                                                                                                                                                                                                                                                                                                                                                                                                                                                                                                                                  |
| Secondary Subject Heading:      | Medical management                                                                                                                                                                                                                                                                                                                                                                                                                                                                                                                                                                                                                                                                                                                                                                                                                                                                                                                                                                                                                                                                                                                                                                   |
| Keywords:                       | De-escalation, Enterobacteriaceae, bloodstream infection, broad-spectrum antibiotics, antimicrobial stewardship                                                                                                                                                                                                                                                                                                                                                                                                                                                                                                                                                                                                                                                                                                                                                                                                                                                                                                                                                                                                                                                                      |
|                                 |                                                                                                                                                                                                                                                                                                                                                                                                                                                                                                                                                                                                                                                                                                                                                                                                                                                                                                                                                                                                                                                                                                                                                                                      |

1  
2  
3 1 Title: Targeted simplification versus antipseudomonal broad-spectrum beta-  
4 lactams in patients with bloodstream infections due to *Enterobacteriaceae*  
5 2  
6 3 (SIMPLIFY): a study protocol for a multicenter, open-label, phase III  
7  
8 4 randomized, controlled, non-inferiority clinical trial  
9  
10 5  
11 6

## 7 **AUTHORS**

8 Luis Eduardo López-Cortés<sup>1</sup>, Clara Rosso-Fernández<sup>2,3</sup>, María Núñez-Núñez<sup>1</sup>,  
9 Lucía Lavín-Alconero<sup>2</sup>, José Bravo-Ferrer<sup>1</sup>, Ángel Barriga<sup>2</sup>, Mercedes Delgado<sup>1</sup>,  
10 Carmen Lupión<sup>1</sup>, Pilar Retamar<sup>1</sup>, Jesús Rodríguez-Baño<sup>1</sup>, and the SIMPLIFY  
11 Study Group\*.

## 13 **Affiliations**

- 14 1. Unidad Clínica de Enfermedades Infecciosas, Microbiología y Medicina  
15 Preventiva, Instituto de Biomedicina de Sevilla, IBiS/Hospitales  
16 Universitarios Virgen Macarena y Virgen del Rocío/CSIC/Universidad de  
17 Sevilla. Sevilla, Spain.
- 18 2. Unidad de Investigación Clínica y Ensayos Clínicos (UICEC-HUVR),  
19 Hospitales Universitario Virgen del Rocío y Virgen Macarena, Sevilla,  
20 Spain.
- 21 3. Farmacología Clínica, Hospital Universitario Virgen del Rocío, Sevilla,  
22 Spain.

23  
24 \* Members of the Simplify Study Group are listed in Acknowledgements.

25  
26 **Author for correspondence:** Luis Eduardo López Cortés

27 **Email:** luiselopezcortes@gmail.com

1  
2  
3 284 29 **KEY WORDS:** De-escalation, *Enterobacteriaceae*, bloodstream infection,  
5  
6 30 broad-spectrum antibiotics, antimicrobial stewardship.  
7

8 31

9 32 **ABSTRACT**10 33 **Introduction:** Within the context of antimicrobial stewardship programs, de-  
11 34 escalation of antimicrobial therapy is one of the proposed strategies for  
12 35 reducing the unnecessary use of broad-spectrum antibiotics (BSA). The  
13 36 empirical treatment of nosocomial and some health-care associated  
14 37 bloodstream infections (BSI) frequently includes a beta-lactam with  
15 38 antipseudomonal activity as monotherapy or in combination with other drugs, so  
16 39 there is a great opportunity to optimize the empirical therapy based on  
17 40 microbiological data. De-escalation is assumed as standard-of-care for experts  
18 41 in infectious diseases; However, it is less frequent than it would desirable.19 42 **Methods and analysis:** The SIMPLIFY trial is a multicenter, open-label, phase  
20 43 III randomized controlled clinical trial, designed as a pragmatic 'real-practice'  
21 44 trial. The aim of this trial is to demonstrate the non-inferiority of de-escalation  
22 45 from an empirical beta-lactam with antipseudomonal activity to a targeted  
23 46 narrow-spectrum antimicrobial in patients with BSI due to *Enterobacteriaceae*. It  
24 47 will be conducted at 19 Spanish public and university hospitals.25 48 **Ethics and dissemination:** Each participating center has obtained the  
26 49 approval of the Ethics Review Committee, the agreement of the Directors of the  
27 50 Institutions, and authorization from the Spanish Regulatory Agency (AEMPS,  
28 51 Agencia Española del Medicamento y Productos Sanitarios). Data will be  
29 52 presented at international conferences and published in peer-reviewed journals.30 53 **Discussion:** Strategies to reduce the use of BSA should be a priority. Most of  
31 54 the studies that support de-escalation are observational, retrospective, and  
32 55 heterogeneous. A recent Cochrane review stated that well-designed clinical  
33 56 trials should be conducted to assess the safety and efficacy of de-escalation.

34 57

35 58 **STRENGTHS OF THIS STUDY**36 59 It will be the first trial on de-escalation specifically in patients with bacteremia  
37 60 due to *Enterobacteriaceae*.

1  
2  
3 61 It will include patients independently of the source of bacteraemia or severity of  
4 62 clinical presentation.

5  
6 63 It has been designed with daily clinical practice in mind.  
7  
8 64

9  
10 65 **LIMITATIONS OF THIS STUDY**

11 66 The open-label design is theoretically more prone to bias but another design is  
12 67 not possible using different options to de-escalate; however, we use a remote  
13 68 automatic randomisation system, hard outcomes as secondary variables and  
14 69 external evaluation by blinded investigators.

15  
16  
17  
18 70 Switching to oral therapy is allowed from the fourth day of randomization. This  
19 71 could potentially reduce the number of days in which patients are assigned to  
20 72 one or other arm, but we decided to include this possibility to avoid  
21 73 unnecessary days of admission.  
22  
23  
24 74

1  
2  
3 75 **BACKGROUND**  
4  
5 76

6 77 The worldwide spread of antimicrobial resistance is recognised as a current  
7 78 global public health threat. The implementation of stewardship programs for  
8 79 optimizing antibiotic use has been shown both to improve antibiotic use and  
9 80 also to help combat antimicrobial resistance [1]. Streamlining or de-escalation of  
10 81 antimicrobial therapy is a strategy proposed to reduce the unnecessary use of  
11 82 broad-spectrum antimicrobials (BSA) [1,2]. This can be carried out by changing  
12 83 from combination therapy to monotherapy or by replacing the empirical  
13 84 antibiotic with one with a narrower spectrum of activity, irrespective of the  
14 85 microbiology results [1].

15 86 Bloodstream infections (BSI) are known to be major causes of morbidity and  
16 87 mortality. They represent suitable organisms for carrying out a de-escalation  
17 88 strategy because they are very frequent, a high proportion of patients are  
18 89 treated with BSA and the susceptibility of the causative organisms is known.  
19 90 The *Enterobacteriaceae* as a group, is the most common cause of community-  
20 91 and nosocomial BSI, with a crude associated mortality of around 15% [3]. The  
21 92 empirical treatment for nosocomial and some healthcare-associated BSI  
22 93 frequently includes a beta-lactam antibiotic with antipseudomonal activity in  
23 94 monotherapy or in combination. This imposes strong selection pressure,  
24 95 particularly on *Pseudomonas aeruginosa* isolates. De-escalation according to  
25 96 microbiological results is assumed as standard-of-care by most infectologists;  
26 97 however, the reality is that de-escalation is much less frequent than is desirable  
27 98 [4,5]. Some of the possible reasons for this phenomenon [6-8] include the fact  
28 99 that the safety and efficacy of this treatment strategy are based only on a few  
29 100 observational studies [9,10] and expert recommendations [11,12]. This was  
30 101 supported by a recent Cochrane review [13] conducted among adults with  
31 102 sepsis, severe sepsis or septic shock, whose authors concluded that there is no  
32 103 adequate direct evidence that de-escalation of antimicrobial agents is effective  
33 104 and safe in this scenario. Randomized clinical trials of their safety and efficacy  
34 105 are needed, in order to establish “proof of concept” and help make clinical  
35 106 decisions.

36 107  
37 108  
38  
39  
40  
41  
42  
43  
44  
45  
46  
47  
48  
49  
50  
51  
52  
53  
54  
55  
56  
57  
58  
59  
60

1  
2  
3 109 **METHODS/DESIGN**  
4

5 110

6 111 **Study hypothesis**  
7

8 112 The aim of the trial is to demonstrate that de-escalation from empirical therapy  
9 113 with an antipseudomonal beta-lactam to a targeted therapy is as effective and  
10 114 safe in patients with BSI due to *Enterobacteriaceae* as continuing with the  
11 115 empirical regimen.  
12  
13

14 116

15  
16 117 **Design**  
17

18 118 The SIMPLIFY trial is a multicenter, open-label, phase III randomized controlled  
19 119 clinical trial, powered to demonstrate the non-inferiority of de-escalation with  
20 120 respect to continuing with the antipseudomonal agent and designed as a real-  
21 121 world pragmatic trial. It was developed in accordance with an extension of the  
22 122 CONSORT statement for reporting non-inferiority, superiority and equivalence  
23 123 trials [14].  
24  
25  
26  
27

28 124

29 125 **Participants and settings**  
30

31 126 The trial will be conducted at 19 public and academic hospitals with the support  
32 127 of the Spanish Network for Research in Infectious Diseases (REIPI) and the  
33 128 Spanish Clinical Research Network (SCReN). Patients will be evaluated for  
34 129 eligibility once *Enterobacteriaceae* is isolated from blood cultures and  
35 130 susceptibility data are available. Detection of eligible patients will be by daily  
36 131 review of blood culture results by the bacteremia team at each center. To be  
37 132 enrolled, participants will need to fulfill all inclusion and exclusion criteria (Table  
38 133 1) plus give written informed consent (the patient or a legally authorized  
39 134 representative).  
40  
41  
42  
43  
44  
45

46 135

47  
48 136 **Randomization**  
49

50 137 Stratified randomization in a 1:1 ratio will be achieved using a centralized, web-  
51 138 based automated randomization system integrated with the eCRF (electronic  
52 139 Case Report Form) to manage assignment to the treatment arms. A copy of the  
53 140 randomization list will be kept in a safe place in case technical problems arise.  
54  
55 141 The only criterion for stratification will be source of bloodstream infection  
56 142 (urinary tract vs any other) in order to ensure that the percentage of patients  
57  
58  
59  
60

1  
2  
3 143 with urinary tract infections is similar in the two groups being compared.  
4  
5 144

6 145 **Intervention**

7  
8 146 A decision tree of enrolment to the study is included in Figure 1. As stated  
9  
10 147 above, all included patients will already be receiving an antipseudomonal beta-  
11  
12 148 lactam (meropenem, imipenem, piperacillin-tazobactam, cefepime, ceftazidime  
13  
14 149 or aztreonam) before randomization occurs. Patients will be allocated to one of  
15  
16 150 the following treatment arms:

17  
18 152 Experimental group:

19  
20 153 The patient will change to an intravenous therapy with an active narrow-  
21  
22 154 spectrum antibiotic according to the susceptibility results (EUCAST or CLSI  
23  
24 155 criteria); the antibiotic will be chosen in the following order (the first active drug  
25  
26 156 will be used): (1) ampicillin, 2 g q6h; (2) trimethoprim/sulfamethoxazole,  
27  
28 157 160/800 mg q8-12h; (3) cefuroxime, 750-1500 mg q8h; (4) cefotaxime 1-2g q8h  
29  
30 158 or ceftriaxone, 1 g q12-24h; (5) amoxicillin/clavulanate, 1g/125 mg q8h; (6)  
31  
32 159 ciprofloxacin, 400 mg q12h; and (7) ertapenem, 1g q24h.  
33  
34 160 Trimethoprim/sulfamethoxazole will only be used in urinary tract infections in the  
35  
36 161 absence of an undrained renal abscess. Ciprofloxacin is included because,  
37  
38 162 apart from being active against *P. aeruginosa*, it is not a beta-lactam.

39  
40 164 Control group:

41  
42 165 Continuation of the antipseudomonal beta-lactam that was being administered  
43  
44 166 on an empirical basis: meropenem, 1-2 g q8h; imipenem, 0.5-1g q6h;  
45  
46 167 piperacillin-tazobactam, 4/0.5 g q6-8h; cefepime, 2 g q8-12h; ceftazidime, 1-2 g  
47  
48 168 q8h; and aztreonam, 1-2 g q8h.

49  
50 170 Exceptions to the above rule:

51  
52 171 Third-generation cephalosporins should be avoided where there are inducible  
53  
54 172 AmpC  $\beta$ -lactamase-producing *Enterobacteriaceae* (*Enterobacter* spp.,  
55  
56 173 *Providencia* spp., *Morganella morganii*, *Serratia marcescens*, and *Citrobacter*  
57  
58 174 *freundii*); hence, even if the isolates are strictly susceptible, for patients in the  
59  
60 175 control group, ceftazidime may be changed to any other antipseudomonal beta-  
176  
177 176 lactam on the day of randomization. For patients allocated to the experimental

1  
2  
3 177 arm, the options will be limited to trimethoprim/sulfamethoxazole, ciprofloxacin  
4 178 or ertapenem.

5  
6 179 ESBL producers could be included in the study based on attending physician's  
7  
8 180 criteria; in this cases, maximum doses of susceptible antibiotics are  
9 181 recommended.

10  
11 182

### 12 13 183 Dose adjustment

14 184 Due to the nature of the study design as a real-world clinical practice trial,  
15 185 antimicrobial dosage will be as deemed by the treating clinician, dependent on  
16 186 pharmacokinetic and pharmacodynamic (PK/PD) characteristics (such as higher  
17 187 doses for septic shock or high body mass). Dose adjustment will be made for all  
18 188 drugs as necessary in the case of renal or hepatic dysfunction, following  
19 189 Summary of Product Characteristics (SmPC) recommendations.  
20  
21  
22  
23  
24

25 190

### 26 191 Concomitant therapy

27  
28 192 Even if the BSI is monomicrobial, the attending physician may consider the  
29 193 infection to be polymicrobial at source. If additional anaerobic or gram-positive  
30 194 coverage is needed, concomitant use of oral metronidazole, clindamycin,  
31 195 vancomycin, teicoplanin, daptomycin or linezolid is allowed in both arms.  
32 196 Concomitant treatment with any other systemic antibiotic with intrinsic activity  
33 197 against gram-negative bacilli is not allowed. The administration of any of these  
34 198 drugs while the patient is receiving the study drug will be deemed a criterion for  
35 199 withdrawal. There are no absolute contraindications for the use of any other  
36 200 drug during the study. However, contraindications, warnings and precautions for  
37 201 use and possible interactions with study drugs are to be taken into account.  
38  
39  
40  
41  
42  
43  
44

45 202

### 46 203 Duration of therapy

47 204 The appropriate duration of therapy is considered to be between 7 and 14 days,  
48 205 according to the attending physician's criteria. Treatments lasting longer than  
49 206 14 days will be allowed only when there is an undrained abscess present, in  
50 207 which case, a 4-week treatment is permitted.  
51  
52  
53  
54

55 208

### 56 209 Route of administration

57  
58 210 Switching to oral therapy is allowed from the sixth day of treatment if all the  
59  
60



1  
2  
3 211 following conditions are fulfilled: clinical improvement has been achieved,  
4 212 absence of fever (>38°C), hemodynamic stability, adequate control of the  
5 213 source of BSI and absence of secondary foci, adequate oral intake, and no  
6 214 gastrointestinal conditions that might compromise drug absorption.

7  
8  
9 215 For patients in the experimental group, switching to oral therapy is allowed with  
10 216 the same intravenous drugs as follows: trimethoprim/sulfamethoxazole 160/800  
11 217 mg q8 -12h, cefuroxime axetil 500 mg q8-12h, amoxicillin/clavulanate 875/125  
12 218 mg q8h, or ciprofloxacin 500 mg q12h. If the intravenous drug is ampicillin,  
13 219 amoxicillin 1 g q8h will be used; if cefotaxime or ceftriaxone, then ceftibuten 400  
14 220 mg q12-24h or cefixime 400 mg q12-24h will be used; if ertapenem, this drug  
15 221 may be switched to the intramuscular route.

16 222 For patients in the control group, the preferred oral option is ciprofloxacin 500  
17 223 mg q12h for all patients. The protocol allows treatment with cefuroxime-axetil  
18 224 500 mg q8-12h or cefixime 400 mg q12-24h only in cases of resistance to  
19 225 ciprofloxacin; finally, parenteral ertapenem 1g q24h may be used for  
20 226 convenience if the isolate is resistant to all other oral options.

21 227

#### 22 228 Rescue medication

23 229 No rescue medication is planned on behalf of the study if a patient has to  
24 230 withdraw from the trial for any reason; the attending physician will follow clinical  
25 231 guidelines for routine clinical practice and GCP (Good clinical practice) rules.

26 232

#### 27 233 Medication

28 234 As all the study drugs are officially approved for BSI caused by  
29 235 *Enterobacteriaceae*, the sponsor will not provide the study drugs. Every site  
30 236 participating in the study is authorised to use the drugs through the normal  
31 237 provision of its hospital pharmacy.

32 238

#### 33 239 Schedule of visits

34 240 Patients included in the study will be followed for 60 days ( $\pm$  5 days) after  
35 241 diagnosis of the BSI (Figure 2). Follow-up will be organised in seven planned  
36 242 visits at day 0 (baseline), day 1; day 3-5; day 7-14 (end of treatment); day 3-5  
37 243 from end of treatment (test of cure, TOC); day 30  $\pm$  5; and day 60  $\pm$  5. Visits at  
38 244 days 30 and 60 may be made by telephone.

1  
2  
3 245 The visit schedule is planned so as to obtain data on clinical status, sample  
4 246 collection, efficacy and safety variables, and adverse events. At the final  
5 247 evaluation at 60 days, data on all outcome variables will be gathered.  
6 248 Additionally, data will be collected at unplanned visits, with special  
7 249 consideration given to the occurrence of any adverse event or recurrence.  
8  
9  
10  
11

12 250

13 251 **Outcomes**

14 252 The primary outcome is clinical cure, which will be assessed at the TOC visit (3-  
15 253 5 days after the end of antibiotic treatment). Secondary outcomes include early  
16 254 (5 days after end of treatment) and late (60-day) clinical and microbiological  
17 255 response, all-cause mortality (days 7, 14, and 30), length of hospital stay,  
18 256 recurrence rates (relapse or reinfection) (day 60), safety of antibiotic treatment,  
19 257 including *Clostridium difficile* infections and number of antibiotic treatments with  
20 258 an antipseudomonal beta-lactam; in a subgroup of patients, the rate of intestinal  
21 259 colonization by ESBL, AmpC- and carbapenemase-producing  
22 260 *Enterobacteriaceae* will also be assessed by rectal swab. Some of these  
23 261 secondary outcomes will be analyzed as composite variables, following the  
24 262 DOOR/RADAR methodology. Outcome definitions, assessment, and time  
25 263 frames for measurement are described in Table 2.  
26  
27  
28  
29  
30  
31  
32  
33  
34  
35

36 264

37 265 **Data collection, management and monitoring**

38 266 The coordinating center for this study is the Hospital Universitario Virgen  
39 267 Macarena, Seville, Spain, and the Clinical Trials Unit (CTU-Hospital  
40 268 Universitario Virgen del Rocío) has delegated sponsor functions on behalf of  
41 269 the Fundación Pública Andaluza para la Gestión de la Investigación en Salud  
42 270 de Sevilla (FISEVI). Clinical research associates (CRAs) connected to the  
43 271 Spanish Clinical Research Network (SCReN) in public hospitals will carry out  
44 272 monitoring activities. Data collection will be conducted by trained staff at each  
45 273 participating center and entered into a restricted access electronic case report  
46 274 form (eCRF). Outstanding queries regarding the completion of the CRF will be  
47 275 sent to all participating centers as necessary to ensure accuracy of data.  
48  
49  
50  
51  
52  
53  
54  
55  
56  
57  
58  
59  
60

276 In order to avoid any association with personal data, all study samples will be  
277 anonymous and identifiable only by the patient's alphanumeric study code. The  
278 objective and management of these samples are included in the patient's

1  
2  
3 279 information sheet and informed consent form.  
4  
5 280 The quality of all data collected will be carefully supervised by the CTU and  
6  
7 281 specific visits for source data verification are organized according to the  
8  
9 282 monitoring plan. Furthermore, in order to minimize bias, at the interim analysis  
10  
11 283 (when 50% of the sample has been included), an independent committee (3  
12  
13 284 independent investigators from the REIPI) blinded to treatment assignment will  
14  
15 285 review all accumulated data. This committee will advise the sponsor on the  
16  
17 286 appropriateness of continuing the clinical trial as designed.  
18

### 18 **Isolates**

19  
20 289 All isolates will be sent to the central laboratory in the Hospital Universitario  
21  
22 290 Virgen Macarena in Seville for susceptibility testing using reference methods  
23  
24 291 and PCR characterisation and sequencing if necessary.  
25  
26 292 Eight selected hospitals will participate in the study of rectal carriage of ESBL-  
27  
28 293 AmpC- and carbapenemase-producing *Enterobacteriaceae*, by taking rectal  
29  
30 294 swabs from participants at different times (as set out in the schedule of visits). A  
31  
32 295 written consent form for samples, approved by the ECs (Ethics Committees), is  
33  
34 296 also provided for the study.  
35

### 35 **Definition of analysis population and outcome measures**

36  
37 299 The following populations will be considered: the intention-to-treat population  
38  
39 300 (ITTP) includes all randomized patients; the modified ITTP (mITTP) includes  
40  
41 301 randomized patients who have received at least one dose of intravenous  
42  
43 302 antibiotics; the clinically evaluable population (CEP) includes patients who have  
44  
45 303 completed 5 days of the intravenous study drug, or who die but have received  
46  
47 304 at least one dose of intravenous antibiotics. The clinically and microbiologically  
48  
49 305 evaluable population (CMEP) includes those in the CEP who have had  
50  
51 306 microbiological tests (at least one blood culture 48 hours after randomization).  
52  
53 307 The principal investigator will assess the primary outcome (clinical cure) in the  
54  
55 308 clinically evaluable population (CEP) at TOC. Due to the intrinsic characteristics  
56  
57 309 of the primary outcome (soft outcome) and the study methodology (non-  
58  
59 310 blinded), the primary outcome will be reviewed on the basis of clinical data  
60  
311 recovered on two occasions by the external blinded investigator: firstly, during  
312 the interim analysis to monitor safety; secondly before the complete cleaning

1  
2  
3 313 and closure of the eCRF. For secondary end points, the CMEP will be eligible  
4 314 for early (day 5) and late (day 60) microbiological responses, the m-ITTP for all-  
5 315 cause mortality and length of hospital stay, and the CEP for the evaluation of  
6 316 recurrence rates and drug safety.  
7  
8  
9

10 317

### 11 318 **Sample size**

12 319 The sample size was calculated using Epidat 4.0. Some of the data used to  
13 320 calculate it was derived from the study published by Retamar *et al* [15].  
14 321 Assuming estimated clinical cure rates of 85% in both groups, a non-inferiority  
15 322 margin of 10% difference between the 2 groups, and treatment assignment in a  
16 323 1:1 ratio, 344 patients in total (172 per study arm) are needed to achieve 80%  
17 324 power with a significance level of 5%. This allows for a 5% dropout rate.  
18  
19  
20  
21  
22

23 325

### 24 326 **Statistical analysis**

25 327 Absolute differences will be calculated with 95% confidence intervals for the  
26 328 clinical cure rate between the two arms of the study at TOC. Multivariate  
27 329 analysis using logistic regression for the main outcome will be performed in  
28 330 order to ensure the independence of the treatment effect. Special consideration  
29 331 will be given in the multivariate analysis to the center of origin of the study  
30 332 sample. A Cox regression analysis of mortality at 5-7, 14, 30 and 60 days will  
31 333 be performed on the mITTP. For the superiority analysis, logistic regression will  
32 334 be used sequentially, using the methodology recently published by Evans *et al*  
33 335 [16] for the composite variable (DOOR and RADAR analysis using survival at  
34 336 day 14, number of days of antipseudomonal beta-lactam treatment avoided,  
35 337 presence or absence of side effects, including *C. difficile* infections, secondary  
36 338 MDRO infections, and all drug-related adverse events). Antimicrobial doses are  
37 339 not fixed and sensitivity analyses will therefore be applied to control potential  
38 340 bias.  
39  
40  
41  
42  
43  
44  
45  
46  
47  
48

49 341

### 50 342 **Protocol violations**

51 343 All protocol violations occurring after randomization will be listed in the Clinical  
52 344 Study Report, tabulated by subject and by recruitment center.  
53  
54  
55  
56  
57  
58  
59  
60

345

346

**347 ETHICAL ISSUES**

348 Each of the participating centers has obtained the approval of an Ethics Review  
349 Committee, the agreement of the Directors of the Institutions (who signed the  
350 contract of agreement with the sponsor of the study) and authorisation from the  
351 Spanish Regulatory Agency (AEMPS, Agencia Española del Medicamento y  
352 Productos Sanitarios). Patients may withdraw from the study at any time without  
353 prejudice, as is documented and explained at the time of providing consent.  
354 The study will be carried out according to the principles of the Declaration of  
355 Helsinki, and Directive 2001/20/EC of the European Parliament and of the  
356 Council of 4 April 2001 on the harmonization of the laws, regulations and  
357 administrative provisions of the Member States relating to the implementation of  
358 Good Clinical Practice in the conduct of clinical trials on medicinal products for  
359 human use until the new Clinical Trials Regulation (CTR) EU No 536/2014  
360 becomes applicable, which will be no earlier than 28 May 2016. The  
361 confidentiality of records that might identify subjects in this study will be  
362 protected in accordance with EU Directive 2001/20/EC. All laws for the control  
363 and protection of personal information will be carefully followed. The identities of  
364 patients will not be disclosed in the e-CRF; names will be replaced by an  
365 alphanumeric code and any material related to the trial, such as samples, will  
366 be identified in the same way, so that no personal information will be revealed.

**368 DISCUSSION**

369 The extensive use of BSA and the dramatic increase in infections due to  
370 multidrug-resistant organisms are forcing the scientific community to look for  
371 strategies to combat this situation. In the real world, the application of de-  
372 escalation to serious infections is less frequent than is desirable. The  
373 arguments against de-escalation include: (1) the MIC of some narrow-spectrum  
374 drugs are closer to susceptibility breakpoints than carbapenems, for example,  
375 and some physicians may therefore feel safer using the latter; (2)  
376 subpopulations resistant to narrow-spectrum drugs may be selected and appear  
377 after some days of empirical treatment, leading to treatment failure in case of  
378 de-escalation; (3) in the case of polymicrobial infections, it is not uncommon for  
379 only one of the pathogens to be isolated in blood cultures, so that simplification  
380 of treatment may be less safe and effective than a broad-spectrum treatment;

1  
2  
3 381 (4) there is some doubt about the real effectiveness of certain drugs against  
4 382 isolates producing specific mechanisms of resistance, such as ESBL.  
5 383 Furthermore, although it is assumed that BSA has a greater impact on the  
6 384 selection of multidrug-resistant strains, some studies suggest that it may  
7 385 depend more on the duration of the treatment than the spectrum [16]. While  
8 386 none of these arguments have been proven, it is also true that there is no  
9 387 strong evidence for the safety of de-escalation strategies in these scenarios.

10 388 To the best of our knowledge, three randomized trials on de-escalation  
11 389 strategies, none of them specifically focused on bacteremia, have been  
12 390 published, which show significant differences from this study [17-19]. The one  
13 391 published by Falguera *et al* [17] compared the efficacy of empirical versus  
14 392 targeted treatment on the basis of urine antigen results in hospitalized patients  
15 393 with community-acquired pneumonia. The article published by Kim *et al* [18]  
16 394 evaluated the efficacy of early use of imipenem/cilastatin and vancomycin  
17 395 followed by de-escalation versus conventional antimicrobials without de-  
18 396 escalation for patients with hospital-acquired pneumonia in ICUs. The last one,  
19 397 published recently by Leone *et al* [20], included a limited number (n=116) of  
20 398 ICU-admitted patients with severe sepsis; Its primary outcome was duration of  
21 399 ICU stay, and not effectiveness of both treatment strategies. In that study, de-  
22 400 escalation followed the recommendations of guidelines, not a pre-specified  
23 401 protocol based on the clinical impact of the antibiotics. There was no significant  
24 402 difference in mortality, although unexpectedly, patients in the experimental arm  
25 403 had a higher rate of superinfections (27% vs 11%,  $P = 0.03$ ). These results  
26 404 contrast with a recent systematic review and meta-analysis that included 25  
27 405 studies with data on de-escalation based on culture results, which showed a  
28 406 significant reduction in the relative risk of death (RR 0.44, 95% CI: 0.30–0.66;  
29 407  $p < 0.0001$ ). It is important to note that many of the included studies in the meta-  
30 408 analysis were observational, retrospective and had a high degree of  
31 409 heterogeneity [21].

32 410 Several authors have warned about the considerable inconsistencies in  
33 411 definitions of de-escalation. In 2015, Weiss *et al* [22] elaborated a consensual  
34 412 definition of de-escalation that allowed beta-lactams to be ranked according to  
35 413 both their spectra and their ecological impact. The authors underlined  
36 414 the difficulty of reaching consensus on the relative ecological impact of each

1  
2  
3 415 individual drug. In 2014, Madaras-Kelly *et al.* [23] used the Delphi approach to  
4 416 develop an antibiotic spectrum score to measure de-escalation. We shall  
5 417 therefore include both concepts in our analysis, using Outcome Ranking  
6 418 (DOOR) and Response Adjusted for Duration of Antibiotic Risk (RADAR)  
7 419 analyses [16].

8 420 Switching from intravenous to oral therapy as soon as the patient is clinically  
9 421 stable can reduce the risk of adverse events related to intravenous therapy,  
10 422 length of hospitalization, and cost. It can be applied regardless of the source of  
11 423 infection and underlying conditions whenever a good option that achieves the  
12 424 PK/PD targets is available [24]. In our study, switching to oral therapy is allowed  
13 425 in both arms to avoid exposing patients in the control arm to unnecessary risks.

14 426 The SIMPLIFY trial has several strengths. In the first place, it will be the first trial  
15 427 on de-escalation specifically in patients with bacteremia due to  
16 428 *Enterobacteriaceae*. Second, it will include patients independently of the source  
17 429 of bacteraemia or severity of clinical presentation. Third, it was designed with  
18 430 daily clinical practice in mind. We hope that, if there is reasonable evidence to  
19 431 reject the null hypothesis, it will encourage implementation of this type of  
20 432 strategy in daily practice.

21 433

#### 22 434 **TRIAL STATUS**

- 23 435
- 24 436 • Funding for the study was approved on 15/08/2015 and available for  
25 437 study expenses in 01/01/2016.
  - 26 438 • EC approval for the 19 sites included was obtained on 15th March 2016.
  - 27 439 • Authorization from the Spanish Regulatory Authority was obtained on  
28 440 18th March 2016.
  - 29 441 • The study has been approved for a recruitment period of 2 years.
  - 30 442 • Dissemination of results directed to patients will be channeled through  
31 443 the Spanish Clinical Studies Registry (Agencia Española del  
32 444 Medicamento y Productos Sanitarios), whose content is adapted to  
33 445 patients.

34 446

35 447

36 448

37 449

38 450

39 451

40 452

1  
2  
3 448 **REGISTRATION**

4 449 Trial registration number: EudraCT number: 2015-004219-19, start date: 18  
5 March 2016. Protocol V.2.0, dated 16 May 2016.  
6  
7

8 451

9 452 **FUNDING**

10  
11 453 This project is a non-commercial, investigator-driven clinical trial, funded  
12 through public competitive call by the Instituto de Salud Carlos III (ISCIII),  
13 454 document number: PI15/00439. The ISCIII is the main public research entity in  
14 455 Spain and reports directly to the Ministry of Economy and Competitiveness and  
15 456 in operational terms to both this Ministry and to the Ministry of Health, Social  
16 457 Services and Equality. The Spanish Network for Research in Infectious  
17 458 Diseases (REIPI) is funded by the Ministerio de Economía y Competitividad, the  
18 459 Instituto de Salud Carlos III, integrated in the national I+D+i 2013-2016 and co-  
19 460 funded by European Union (ERDF/ESF, "Investing in your future"). This study is  
20 461 supported by the Spanish Clinical Research Network and funded by ISCII: study  
21 462 number 16.001.  
22  
23  
24  
25  
26  
27  
28  
29

30 464

31 465 **COMPETING INTERESTS ESTATEMENT**

32 466 The authors have no competing interests to declare.  
33  
34

35 467

36 468 **CONTRIBUTORSHIP STATEMENT**

37 469 JR-B and LEL-C were responsible for formulating the overall research questions  
38 470 and for the methodological design of the study. CR-F, BA and LL-A collaborated  
39 471 in the submission of the project for the Spanish funding, and collaborated in the  
40 472 methodological aspects of the study. JR-B is the coordinating investigator and  
41 473 leader of the Coordination Team. CR-F is responsible for the CTU. MN-N and is  
42 474 the pharmacovigilance monitor, and JB-F, PR-G, and CL collaborated in the  
43 475 organisation of the study. MD contributed in all the microbiological details of the  
44 476 study. JR-B and LEL-C participated in its design and supervised the project. All  
45 477 authors read and approved the final manuscript.  
46  
47  
48  
49  
50

51 478

52 479 **DATA SHARING STATEMENT**

53 480 No additional unpublished data from the study are available  
54  
55  
56  
57  
58  
59  
60

481



1  
2  
3 482 **ACKNOWLEDGEMENTS:** P. Aguilar, I.J. de la Calle, and A. Romero (Hospital  
4 483 Universitario Puerto Real, Cádiz); E. Merino, V. Boix, L.Giner, J.C. Rodríguez  
5 484 and A. Gimeno (Hospital Universitario de Alicante); F. Guerrero-Sánchez, A.  
6 485 Martin-Aspas and F. Galán-Sánchez (Hospital Universitario Puerta del Mar,  
7 486 Cádiz); D. Diez, V. Pérez-Carral and M.I. Paz (Complejo Hospitalario  
8 487 Universitario de Ourense); C. Fariñas, C. Armiñanzas, C. González and C.  
9 488 Ruiz de Alegría-Puig (Hospital Universitario Marqués de Valdecilla, Santander);  
10 489 L. Gómez, E. Calbo and M. Xercavins-Valls (Hospital Universitario Mutua  
11 490 Terrassa, Terrassa); F. García-Colchero and M. Chávez (Hospital San Juan de  
12 491 Dios, Sevilla); J. Goikoetxea-Agirre, M. Montejo and L. López (Hospital  
13 492 Universitario de Cruces, Barakaldo); R. Fernández, C. Pereira, S. Corral and M.  
14 493 Chávez (Hospital San Juan de Dios, Aljarafe); G. Bou and I. Torres (Hospital  
15 494 Universitario A Coruña); S. Pérez-Cortés and M.D. López-Prieto (Hospital  
16 495 Universitario de Jerez); B. Loeches and M. Romero (Hospital Universitario La  
17 496 Paz, Madrid); M. Ibarguren, M. A. Goenaga-Sánchez and J. M. García-  
18 497 Arenzana (Hospital Universitario Donostia); J. R. Yuste and J. Leiva-León  
19 498 (Clínica Universitaria de Navarra); A. Salas-Aparicio and C. de las Cuevas  
20 499 (Hospital Universitario La Princesa, Madrid); J.M. Guerra-Laso and I.  
21 500 Fernández-Natal (Complejo Asistencial Universitario de León); M. T. Pérez and  
22 501 F. Vasallo (Xerencia de Xestión Integrada de Vigo); G. Cuervo and C. Ardanuy  
23 502 (Hospital Universitario de Bellvitge); J.R. Paño and S. Salvo (Hospital Clínico  
24 503 Universitario Lozano Blesa, Zaragoza); M. L. Martin-Pena and E. Ruiz de  
25 504 Gospegui (Hospital Universitario Son Espases); M. Coronel-Janeiro, M.P.  
26 505 Alarcón-González, and A. González-Herrero (Hospital Universitario Virgen  
27 506 Macarena).  
28  
29  
30  
31  
32  
33  
34  
35  
36  
37  
38  
39  
40  
41  
42  
43  
44  
45  
46  
47  
48  
49  
50  
51  
52  
53  
54  
55  
56  
57  
58  
59  
60

508 **REFERENCES**

509

510 1. Rodríguez-Baño J, Paño-Pardo JR, Alvarez-Rocha L, *et al*. Programs for  
511 optimizing the use of antibiotics (PROA) in Spanish hospitals: GEIH-SEIMC,  
512 SEFH and SEMPSPH consensus document. *Enferm Infecc Microbiol Clin* 2012;  
513 30:22.e1-22.e23.

514 2. Dellit TH, Owens RC, McGowan JE Jr, *et al*; Infectious Diseases Society of  
515 America; Society for Healthcare Epidemiology of America. Infectious Diseases  
516 Society of America and the Society for Healthcare Epidemiology of America  
517 guidelines for developing an institutional program to enhance antimicrobial  
518 stewardship. *Clin Infect Dis* 2007; 44(2):159-77.

519 3. Rodríguez-Baño J, López-Prieto MD, Portillo MM, *et al*; SAEI/SAMPAC  
520 Bacteraemia Group. Epidemiology and clinical features of community-acquired,  
521 healthcare-associated and nosocomial bloodstream infections in tertiary-care  
522 and community hospitals. *Clin Microbiol Infect* 2010; 16(9):1408-13.

523 4. Paterson DL, Rice LB. Empirical antibiotic choice for the seriously ill patient:  
524 are minimization of selection of resistant organisms and maximization of  
525 individual outcome mutually exclusive? *Clin Infect Dis* 2003; 36(8):1006-12

526 5. Livermore DM. Has the era of untreatable infections arrived? *J Antimicrob*  
527 *Chemother* 2009; 64 Suppl 1:i29-36.

528 6. Khasawneh FA, Karim A, Mahmood T, *et al*. Antibiotic de-escalation in  
529 bacteremic urinary tract infections: potential opportunities and effect on  
530 outcome. *Infection*. 2014; 42(5):829-34.

531 7. Heenen S, Jacobs F, Vincent JL. Antibiotic strategies in severe nosocomial  
532 sepsis: why do we not de-escalate more often?. *Crit Care Med* 2012; 40:1404-  
533 9.

534 8. Bal AM, Gould IM. Antibiotic stewardship: overcoming implementation  
535 barriers. *Curr Opin Infect Dis* 2011; 24:357-62.

536  
537 9. De Bus L, Denys W, Catteuw J, *et al*. Impact of de-escalation of beta-lactam  
538 antibiotics on the emergence of antibiotic resistance in ICU patients: a  
539 retrospective observational study. *Intensive Care Med* 2016; 42(6):1029-39.

540 10. Mokart D, Slehofer G, Lambert J, *et al*. De-escalation of antimicrobial  
541 treatment in neutropenic patients with severe sepsis: results from an  
542 observational study. *Intensive Care Med* 2014; 40(1):41-9.

- 1  
2  
3 543 11. Kaye KS. Antimicrobial de-escalation strategies in hospitalized patients with  
4 544 pneumonia, intra-abdominal infections, and bacteremia. *J Hosp Med* 2012;7  
5 545 Suppl 1:S13-21.  
6  
7 546 12. Montravers P, Piednoir P, Allou N. De-escalation: in drug we trust. *Crit Care*  
8 547 *Med* 2012 ; 40(5):1645-6.  
9  
10 548 13. Silva BN, Andriolo RB, Atallah AN, *et al.* De-escalation of antimicrobial  
11 549 treatment for adults with sepsis, severe sepsis or septic shock. *Cochrane*  
12 550 *Database Syst Rev* 2013; (3):CD007934.  
13  
14 551 14. Piaggio G, Elbourne DR, Pocock SJ, *et al*; CONSORT Group. Reporting of  
15 552 noninferiority and equivalence randomized trials: extension of the CONSORT  
16 553 2010 statement. *JAMA* 2012; 308(24):2594-604.  
17  
18 554 15. Retamar P, Portillo MM, López-Prieto MD, *et al*; SAEI/SAMPAC. Impact of  
19 555 inadequate empirical therapy on the mortality of patients with bloodstream  
20 556 infections: a propensity score-based analysis. *Antimicrob Agents Chemother*  
21 557 2012; 56:472.  
22  
23 558 16. Evans SR, Rubin D, Follmann D, *et al.* Desirability of Outcome Ranking  
24 559 (DOOR) and Response Adjusted for Duration of Antibiotic Risk (RADAR). *Clin*  
25 560 *Infect Dis* 2015; 61(5):800-6.  
26  
27 561 17. DiNubile MJ, Chow JW, Satishchandran V, *et al.* Acquisition of resistant  
28 562 bowel flora during a double-blind randomized clinical trial of ertapenem versus  
29 563 piperacillin-tazobactam therapy for intraabdominal infections. *Antimicrob Agents*  
30 564 *Chemother* 2005; 49:3217-21.  
31  
32 565 18. Falguera M, Ruiz-Gonzalez A, Schoenenberger JA, *et al.* Prospective,  
33 566 randomised study to compare empirical treatment versus targeted treatment on  
34 567 the basis of the urine antigen results in hospitalised patients with community-  
35 568 acquired pneumonia. *Thorax* 2010; 65(2):101-106.  
36  
37 569 19. Kim JW, Chung J, Choi SH, *et al.* Early use of imipenem/cilastatin and  
38 570 vancomycin followed by de-escalation versus conventional antimicrobials  
39 571 without de-escalation for patients with hospital-acquired pneumonia in a  
40 572 medical ICU: a randomized clinical trial. *Crit Care* 2012; 16(1):R28.  
41  
42 573 20. Leone M, Bechis C, Baumstarck K, *et al*; AZUREA Network Investigators.  
43 574 De-escalation versus continuation of empirical antimicrobial treatment in severe  
44 575 sepsis: a multicenter non-blinded randomized noninferiority trial. *Intensive Care*  
45 576 *Med* 2014; 40(10):1399-408.

- 1  
2  
3 577 21. Paul M, Dickstein Y, Raz-Pasteur A. Antibiotic de-escalation for  
4 578 bloodstream infections and pneumonia: systematic review and meta-analysis.  
5 579 *Clin Microbiol Infect* 2016. Ahead of print.  
6  
7 580 22. Weiss E, Zahar JR, Lesprit P, *et al*; De-escalation Study Group. Elaboration  
8 581 of a consensual definition of de-escalation allowing a ranking of  $\beta$ -lactams. *Clin*  
9 582 *Microbiol Infect* 2015; 21(7):649.e1-10.  
10  
11 583 23. Madaras-Kelly K, Jones M, Remington R, *et al*. Development of an antibiotic  
12 584 spectrum score based on veterans affairs culture and susceptibility data for the  
13 585 purpose of measuring antibiotic de-escalation: a modified Delphi approach.  
14 586 *Infect Control Hosp Epidemiol* 2014; 35(9):1103-13.  
15  
16 587 24. Mertz D, Koller M, Haller P, *et al*. Outcomes of early switching from  
17 588 intravenous to oral antibiotics on medical wards. *J Antimicrob Chemother* 2009;  
18 589 64(1):188-99.  
19  
20 590  
21 591  
22  
23  
24  
25  
26  
27  
28  
29  
30  
31  
32  
33  
34  
35  
36  
37  
38  
39  
40  
41  
42  
43  
44  
45  
46  
47  
48  
49  
50  
51  
52  
53  
54  
55  
56  
57  
58  
59  
60

592 **Table 1. Inclusion and exclusion criteria**

|                                                                                                                                                                                                                                                                                                                                                                                                                                                                                                                                                                                                                                                                                                                                                                                                                                                                                                                                                                                      |
|--------------------------------------------------------------------------------------------------------------------------------------------------------------------------------------------------------------------------------------------------------------------------------------------------------------------------------------------------------------------------------------------------------------------------------------------------------------------------------------------------------------------------------------------------------------------------------------------------------------------------------------------------------------------------------------------------------------------------------------------------------------------------------------------------------------------------------------------------------------------------------------------------------------------------------------------------------------------------------------|
| <p><b>Inclusion criteria</b></p> <ol style="list-style-type: none"><li>1. Written informed consent has been obtained from the patient or the legally authorised representative.</li><li>2. Age <math>\geq</math> 18 years, not legally incapacitated.</li><li>3. Hospitalised patients with monomicrobial bacteremia due to <i>Enterobacteriaceae</i> from any source.</li><li>4. The patient has received active empiric antibiotic therapy with an antipseudomonal beta-lactam (imipenem, meropenem, piperacillin-tazobactam, cefepime, ceftazidime, aztreonam), alone or in combination with another antimicrobial agent, which started in the first 24 hours after the first positive blood culture was taken.</li><li>5. The isolate is susceptible to at least one of antibiotics included in the experimental arm.</li><li>6. Intravenous antimicrobial treatment is planned for at least 5 days once <i>Enterobacteriaceae</i> is isolated from the blood culture.</li></ol> |
| <p><b>Exclusion criteria</b></p> <ol style="list-style-type: none"><li>1. Life expectancy <math>&lt;</math>30 days.</li><li>2. Pregnancy or nursing. For included women: failure to use a highly effective contraceptive method.</li><li>3. Isolation of carbapenemase-producing <i>Enterobacteriaceae</i> (because most hospitals do not use monotherapy in these cases).</li><li>4. Inclusion is delayed <math>&gt;</math>48 h after susceptibility data of the isolate are available.</li><li>5. Severe neutropenia (<math>&lt;</math>500 cells/mm<sup>3</sup>) on the day of randomization.</li><li>6. Planned duration of treatment <math>&gt;</math>28 days (e.g. osteomyelitis, endocarditis).</li></ol>                                                                                                                                                                                                                                                                      |

593

594

595

596 **Table 2. Outcome definitions and time frames**

597

598

| Primary End Point and Time Frame                                                                                              | Definition and Assessment                                                                                                                                                                                                                                                                                                                                                           |
|-------------------------------------------------------------------------------------------------------------------------------|-------------------------------------------------------------------------------------------------------------------------------------------------------------------------------------------------------------------------------------------------------------------------------------------------------------------------------------------------------------------------------------|
| CLINICAL CURE<br>Day 3-5 after treatment*                                                                                     | TOC, the situation where all the following conditions are met: survival at the time of the evaluation; complete resolution of all symptoms and signs of infection (or return to the situation prior to current infection); no need for prolonged antibiotic treatment beyond the recommended duration* and no need for treatment modification due to unfavorable clinical response. |
| *7-14 days according to IDSA, except in the presence of undrained or late-draining abscesses, when up to 4 weeks are allowed. |                                                                                                                                                                                                                                                                                                                                                                                     |
| Secondary End Point and Time Frame                                                                                            | Definition and Assessment                                                                                                                                                                                                                                                                                                                                                           |
| CLINICAL RESPONSE<br>After 5 days of treatment (early response)<br>Until Day 60 of follow-up (late response)                  | Same as clinical cure                                                                                                                                                                                                                                                                                                                                                               |
| MICROBIOLOGICAL CURE<br>After 5 days of treatment (early response)<br>Until Day 60 of follow-up (late response)               | Negative blood cultures and where applicable, negative cultures from samples taken from initial infection focus. 'PRESUMPTIVE MICROBIOLOGIC CURE' is accepted in those cases where it is not possible to prove the negativization of isolates from initial focus.                                                                                                                   |
| ALL-CAUSE MORTALITY<br>7, 14 and 60-day of follow-up                                                                          | Death for any reason                                                                                                                                                                                                                                                                                                                                                                |
| LENGTH OF HOSPITAL STAY                                                                                                       | Time from randomisation to hospital discharge                                                                                                                                                                                                                                                                                                                                       |
| CLINICAL RECURRENCE (RELAPSE OR REINFECTION) RATES<br>60-day of follow-up                                                     | Recurrence of at least one clinical and one analytical sepsis criterion, with presence or absence of bacteraemia                                                                                                                                                                                                                                                                    |
| MICROBIOLOGICAL RECURRENCE (RELAPSE OR REINFECTION) RATES<br>60-day of follow-up                                              | New BSI episode with the same isolate as initial cultures with previously clinical and microbiological cure                                                                                                                                                                                                                                                                         |
| NUMBER OF DAYS OF APBL AVOIDED<br>Until end of treatment                                                                      | Number of days of antibiotic treatment with an antipseudomonal beta-lactam (APBL) avoided                                                                                                                                                                                                                                                                                           |
| ECOLOGICAL IMPACT<br>7-14, 12-21, 30 days                                                                                     | Intestinal colonization by multidrug-resistant Gram-negative bacilli                                                                                                                                                                                                                                                                                                                |
| SAFETY OF DRUGS - adverse events<br>Until Day 60 of follow-up                                                                 | Any untoward medical occurrence associated with the use of a drug in humans, whether or not considered drug-related.                                                                                                                                                                                                                                                                |
| COMPOSITE SECONDARY VARIABLES<br>7-14, 60-day follow up                                                                       | Survival on day 14, number of days with an antipseudomonal beta-lactam avoided, presence or absence of side effects, including <i>C. difficile</i> infections, secondary MDRO infections and all drug-related adverse events                                                                                                                                                        |

599

600

1  
2  
3 601 Figure 1. SIMPLIFY – Decision tree of patient enrolment  
4 602 Figure 2. Schedule of visits and assessments. Except where otherwise specified, these refer to  
5 603 days from randomization.  
6  
7 604  
8  
9  
10  
11  
12  
13  
14  
15  
16  
17  
18  
19  
20  
21  
22  
23  
24  
25  
26  
27  
28  
29  
30  
31  
32  
33  
34  
35  
36  
37  
38  
39  
40  
41  
42  
43  
44  
45  
46  
47  
48  
49  
50  
51  
52  
53  
54  
55  
56  
57  
58  
59  
60

For peer review only

1  
2  
3  
4  
5  
6  
7  
8  
9  
10  
11  
12  
13  
14  
15  
16  
17  
18  
19  
20  
21  
22  
23  
24  
25  
26  
27  
28  
29  
30  
31  
32  
33  
34  
35  
36  
37  
38  
39  
40  
41  
42  
43  
44  
45  
46  
47  
48  
49

Figure 1.

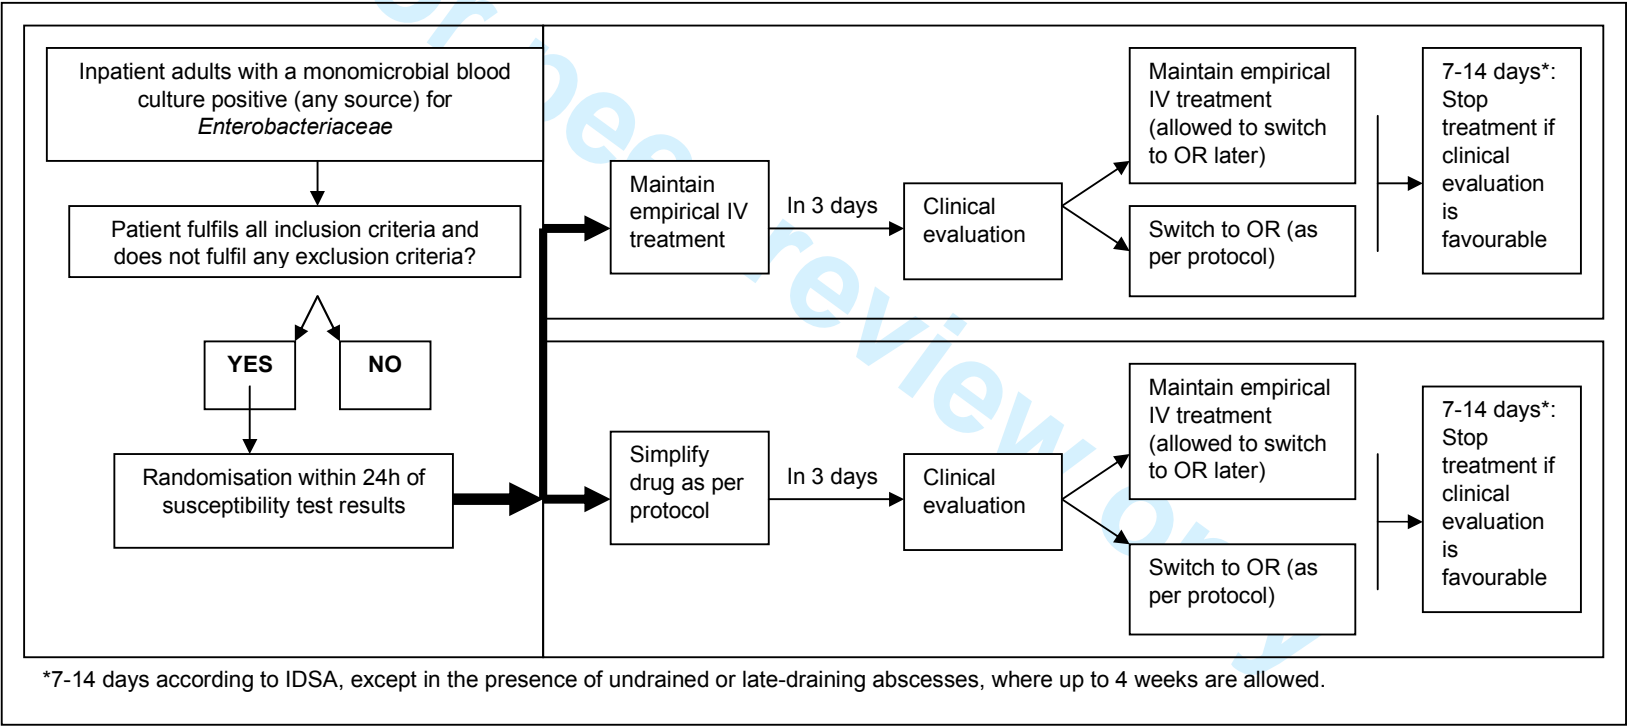



Figure 2.

| Procedures                        | Selecti on visit (Day 0) | Visit 1 (Day 1) | Visit 2 (Day 3-5) | End of treatment (Day 7-14) <sup>2,3</sup> | Test of cure (Day 12-21) <sup>1</sup> | Follow-up visit (Day 30±5) <sup>2</sup> | End of study (Day 60) <sup>2</sup> |
|-----------------------------------|--------------------------|-----------------|-------------------|--------------------------------------------|---------------------------------------|-----------------------------------------|------------------------------------|
| Randomization                     | X                        |                 |                   |                                            |                                       |                                         |                                    |
| Informed consent                  | X                        |                 |                   |                                            |                                       |                                         |                                    |
| Check in/exclusion criteria       | X                        |                 |                   |                                            |                                       |                                         |                                    |
| Pregnancy test                    | X                        |                 |                   |                                            |                                       |                                         |                                    |
| Demographic data/ medical history | X                        | X               | X                 | X                                          | X                                     | X                                       | X                                  |
| Physical examination              | X                        | X               | X                 | X <sup>2</sup>                             | X                                     | X <sup>2</sup>                          | X <sup>2</sup>                     |
| Laboratory data                   |                          | X               | X                 | X <sup>2</sup>                             | X                                     |                                         |                                    |
| Blood culture                     | X                        |                 | X                 | X <sup>3</sup>                             |                                       |                                         |                                    |
| Rectal swab <sup>4</sup>          | X                        |                 |                   | X                                          | X                                     | X                                       |                                    |
| Ancillary drugs                   | X                        | X               | X                 | X                                          |                                       | X                                       | X                                  |
| Drug dispensing control           | X                        | X               | X                 | X                                          |                                       |                                         |                                    |
| Adverse events                    |                          | X               | X                 | X                                          | X                                     | X                                       | X                                  |

(1) In the presence of an undrained abscess, TOC will be performed on day 28 or if drainage occurs after day 7 of treatment, TOC is to be done 7 days after that day; (2) This visit may be made by telephone if the patient has been discharged. In this scenario, no physical examination or lab tests are requested; (3) Only if previous blood cultures or symptoms remain positive; (4) Only in selected hospitals and face-to-face scheduled visits

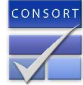

## CONSORT 2010 checklist of information to include when reporting a randomised trial\*

| Section/Topic                    | Item No | Checklist item                                                                                                                                                                              | Reported on page No |
|----------------------------------|---------|---------------------------------------------------------------------------------------------------------------------------------------------------------------------------------------------|---------------------|
| <b>Title and abstract</b>        |         |                                                                                                                                                                                             |                     |
|                                  | 1a      | Identification as a randomised trial in the title                                                                                                                                           | 1                   |
|                                  | 1b      | Structured summary of trial design, methods, results, and conclusions (for specific guidance see CONSORT for abstracts)                                                                     | 2                   |
| <b>Introduction</b>              |         |                                                                                                                                                                                             |                     |
| Background and objectives        | 2a      | Scientific background and explanation of rationale                                                                                                                                          | 4                   |
|                                  | 2b      | Specific objectives or hypotheses                                                                                                                                                           | 4                   |
| <b>Methods</b>                   |         |                                                                                                                                                                                             |                     |
| Trial design                     | 3a      | Description of trial design (such as parallel, factorial) including allocation ratio                                                                                                        | 5                   |
|                                  | 3b      | Important changes to methods after trial commencement (such as eligibility criteria), with reasons                                                                                          | 5                   |
| Participants                     | 4a      | Eligibility criteria for participants                                                                                                                                                       | 5                   |
|                                  | 4b      | Settings and locations where the data were collected                                                                                                                                        | 5-8, 9              |
| Interventions                    | 5       | The interventions for each group with sufficient details to allow replication, including how and when they were actually administered                                                       | 9                   |
| Outcomes                         | 6a      | Completely defined pre-specified primary and secondary outcome measures, including how and when they were assessed                                                                          | 9-10                |
|                                  | 6b      | Any changes to trial outcomes after the trial commenced, with reasons                                                                                                                       | 11                  |
| Sample size                      | 7a      | How sample size was determined                                                                                                                                                              | 11                  |
|                                  | 7b      | When applicable, explanation of any interim analyses and stopping guidelines                                                                                                                | 9-10                |
| <b>Randomisation:</b>            |         |                                                                                                                                                                                             |                     |
| Sequence generation              | 8a      | Method used to generate the random allocation sequence                                                                                                                                      | 5                   |
|                                  | 8b      | Type of randomisation; details of any restriction (such as blocking and block size)                                                                                                         | 5                   |
| Allocation concealment mechanism | 9       | Mechanism used to implement the random allocation sequence (such as sequentially numbered containers), describing any steps taken to conceal the sequence until interventions were assigned | 5                   |
| Implementation                   | 10      | Who generated the random allocation sequence, who enrolled participants, and who assigned participants to interventions                                                                     | 5                   |
| Blinding                         | 11a     | If done, who was blinded after assignment to interventions (for example, participants, care providers, those                                                                                | ---                 |

|    |                          |                                                                                                                     |       |
|----|--------------------------|---------------------------------------------------------------------------------------------------------------------|-------|
| 1  |                          |                                                                                                                     |       |
| 2  |                          | assessing outcomes) and how                                                                                         |       |
| 3  |                          |                                                                                                                     |       |
| 4  |                          | 11b If relevant, description of the similarity of interventions                                                     | ----  |
| 5  | Statistical methods      | 12a Statistical methods used to compare groups for primary and secondary outcomes                                   | 11    |
| 6  |                          | 12b Methods for additional analyses, such as subgroup analyses and adjusted analyses                                | 11    |
| 7  |                          |                                                                                                                     |       |
| 8  | <b>Results</b>           |                                                                                                                     |       |
| 9  | Participant flow (a      | 13a For each group, the numbers of participants who were randomly assigned, received intended treatment, and        | 10-11 |
| 10 | diagram is strongly      | were analysed for the primary outcome                                                                               |       |
| 11 | recommended)             | 13b For each group, losses and exclusions after randomisation, together with reasons                                |       |
| 12 | Recruitment              | 14a Dates defining the periods of recruitment and follow-up                                                         |       |
| 13 |                          | 14b Why the trial ended or was stopped                                                                              |       |
| 14 |                          |                                                                                                                     |       |
| 15 | Baseline data            | 15 A table showing baseline demographic and clinical characteristics for each group                                 |       |
| 16 | Numbers analysed         | 16 For each group, number of participants (denominator) included in each analysis and whether the analysis was      |       |
| 17 |                          | by original assigned groups                                                                                         |       |
| 18 |                          |                                                                                                                     |       |
| 19 | Outcomes and             | 17a For each primary and secondary outcome, results for each group, and the estimated effect size and its           |       |
| 20 | estimation               | precision (such as 95% confidence interval)                                                                         |       |
| 21 |                          | 17b For binary outcomes, presentation of both absolute and relative effect sizes is recommended                     |       |
| 22 | Ancillary analyses       | 18 Results of any other analyses performed, including subgroup analyses and adjusted analyses, distinguishing       |       |
| 23 |                          | pre-specified from exploratory                                                                                      |       |
| 24 |                          |                                                                                                                     |       |
| 25 | Harms                    | 19 All important harms or unintended effects in each group (for specific guidance see CONSORT for harms)            |       |
| 26 |                          |                                                                                                                     |       |
| 27 | <b>Discussion</b>        |                                                                                                                     |       |
| 28 | Limitations              | 20 Trial limitations, addressing sources of potential bias, imprecision, and, if relevant, multiplicity of analyses | 12-14 |
| 29 | Generalisability         | 21 Generalisability (external validity, applicability) of the trial findings                                        | 12-14 |
| 30 | Interpretation           | 22 Interpretation consistent with results, balancing benefits and harms, and considering other relevant evidence    | 12-14 |
| 31 |                          |                                                                                                                     |       |
| 32 | <b>Other information</b> |                                                                                                                     |       |
| 33 | Registration             | 23 Registration number and name of trial registry                                                                   | 15    |
| 34 | Protocol                 | 24 Where the full trial protocol can be accessed, if available                                                      | 15    |
| 35 | Funding                  | 25 Sources of funding and other support (such as supply of drugs), role of funders                                  | 15    |
| 36 |                          |                                                                                                                     |       |

37

38 \*We strongly recommend reading this statement in conjunction with the CONSORT 2010 Explanation and Elaboration for important clarifications on all the items. If relevant, we also

39 recommend reading CONSORT extensions for cluster randomised trials, non-inferiority and equivalence trials, non-pharmacological treatments, herbal interventions, and pragmatic trials.

40 Additional extensions are forthcoming: for those and for up to date references relevant to this checklist, see [www.consort-statement.org](http://www.consort-statement.org).

41

42

# BMJ Open

## Targeted simplification versus antipseudomonal broad-spectrum beta-lactams in patients with bloodstream infections due to Enterobacteriaceae (SIMPLIFY): a study protocol for a multicenter, open-label, phase III randomized, controlled, non-inferiority clinical trial

|                                 |                                                                                                                                                                                                                                                                                                                                                                                                                                                                                                                                                                                                                                                                                                                                                                                                                                                                                                                                                                                                                                                                                                                                                                                                                                                                                                                                                                   |
|---------------------------------|-------------------------------------------------------------------------------------------------------------------------------------------------------------------------------------------------------------------------------------------------------------------------------------------------------------------------------------------------------------------------------------------------------------------------------------------------------------------------------------------------------------------------------------------------------------------------------------------------------------------------------------------------------------------------------------------------------------------------------------------------------------------------------------------------------------------------------------------------------------------------------------------------------------------------------------------------------------------------------------------------------------------------------------------------------------------------------------------------------------------------------------------------------------------------------------------------------------------------------------------------------------------------------------------------------------------------------------------------------------------|
| Journal:                        | <i>BMJ Open</i>                                                                                                                                                                                                                                                                                                                                                                                                                                                                                                                                                                                                                                                                                                                                                                                                                                                                                                                                                                                                                                                                                                                                                                                                                                                                                                                                                   |
| Manuscript ID                   | bmjopen-2016-015439.R1                                                                                                                                                                                                                                                                                                                                                                                                                                                                                                                                                                                                                                                                                                                                                                                                                                                                                                                                                                                                                                                                                                                                                                                                                                                                                                                                            |
| Article Type:                   | Protocol                                                                                                                                                                                                                                                                                                                                                                                                                                                                                                                                                                                                                                                                                                                                                                                                                                                                                                                                                                                                                                                                                                                                                                                                                                                                                                                                                          |
| Date Submitted by the Author:   | 28-Feb-2017                                                                                                                                                                                                                                                                                                                                                                                                                                                                                                                                                                                                                                                                                                                                                                                                                                                                                                                                                                                                                                                                                                                                                                                                                                                                                                                                                       |
| Complete List of Authors:       | <p>López-Cortés, Luis Eduardo; Hospital Universitario Virgen Macarena, Enfermedades Infecciosas y Microbiología Clínica<br/>Rosso-Fernández, Clara; Hospital Universitario Virgen del Rocío, Unidad de Ensayos clínicos; Hospital Universitario Virgen del Rocío, Farmacología Clínica<br/>Núñez-Núñez, María; Instituto de Biomedicina de Sevilla (IBiS)/Hospital Universitario Virgen Macarena /CSIC/Universidad de Sevilla. Sevilla, Spain., Unidad Clínica de Enfermedades Infecciosas, Microbiología y Medicina Preventiva; Hospital Universitario Virgen Macarena, Unidad Clínica de Farmacia<br/>Lavín-Alconero, Lucía; Hospital Universitario Virgen del Rocío, Unidad de ensayos clínicos<br/>Bravo-Ferrer, José; Hospitales Universitarios Virgen Macarena y Virgen del Rocío, Unidad de Gestión Clínica de Enfermedades Infecciosas, Microbiología y Medicina Preventiva<br/>Barriga, Ángel; Hospital Universitario Virgen del Rocío, Unidad de ensayos clínicos<br/>Delgado, Mercedes; Hospital Universitario Virgen Macarena, Microbiología Clínica<br/>Lupión, Carmen; Hospital Universitario Virgen Macarena, Enfermedades Infecciosas y Microbiología Clínica<br/>Retamar, Pilar; Hospital Universitario Virgen Macarena, Enfermedades Infecciosas y Microbiología Clínica<br/>Rodríguez-Baño, Jesús; Hospital Universitario Virgen Macarena,</p> |
| <b>Primary Subject Heading</b>: | Infectious diseases                                                                                                                                                                                                                                                                                                                                                                                                                                                                                                                                                                                                                                                                                                                                                                                                                                                                                                                                                                                                                                                                                                                                                                                                                                                                                                                                               |
| Secondary Subject Heading:      | Medical management                                                                                                                                                                                                                                                                                                                                                                                                                                                                                                                                                                                                                                                                                                                                                                                                                                                                                                                                                                                                                                                                                                                                                                                                                                                                                                                                                |
| Keywords:                       | De-escalation, Enterobacteriaceae, bloodstream infection, broad-spectrum antibiotics, antimicrobial stewardship                                                                                                                                                                                                                                                                                                                                                                                                                                                                                                                                                                                                                                                                                                                                                                                                                                                                                                                                                                                                                                                                                                                                                                                                                                                   |
|                                 |                                                                                                                                                                                                                                                                                                                                                                                                                                                                                                                                                                                                                                                                                                                                                                                                                                                                                                                                                                                                                                                                                                                                                                                                                                                                                                                                                                   |

1  
2  
3  
4  
5  
6  
7  
8  
9  
10  
11  
12  
13  
14  
15  
16  
17  
18  
19  
20  
21  
22  
23  
24  
25  
26  
27  
28  
29  
30  
31  
32  
33  
34  
35  
36  
37  
38  
39  
40  
41  
42  
43  
44  
45  
46  
47  
48  
49  
50  
51  
52  
53  
54  
55  
56  
57  
58  
59  
60

SCHOLARONE™  
Manuscripts

For peer review only

1  
2  
3 1 Title: Targeted simplification versus antipseudomonal broad-spectrum beta-  
4  
5 2 lactams in patients with bloodstream infections due to *Enterobacteriaceae*  
6  
7 3 (SIMPLIFY): a study protocol for a multicenter, open-label, phase III  
8  
9 4 randomized, controlled, non-inferiority clinical trial  
10  
11  
12  
13  
14  
15  
16

## 17 **AUTHORS**

18 Luis Eduardo López-Cortés<sup>1</sup>, Clara Rosso-Fernández<sup>2,3</sup>, María Núñez-Núñez<sup>1,4</sup>,  
19  
20 Lucía Lavín-Alconero<sup>2</sup>, José Bravo-Ferrer<sup>1</sup>, Ángel Barriga<sup>2</sup>, Mercedes Delgado<sup>1</sup>,  
21  
22 Carmen Lupión<sup>1</sup>, Pilar Retamar<sup>1</sup>, Jesús Rodríguez-Baño<sup>1</sup>, and the SIMPLIFY  
23  
24 Study Group\*.  
25  
26  
27  
28  
29

## 30 **Affiliations**

- 31  
32 1. Unidad Clínica de Enfermedades Infecciosas, Microbiología y Medicina  
33  
34 Preventiva, Instituto de Biomedicina de Sevilla (IBiS)/Hospital  
35  
36 Universitario Virgen Macarena /CSIC/Universidad de Sevilla. Sevilla,  
37  
38 Spain.  
39
- 40  
41 2. Unidad de Investigación Clínica y Ensayos Clínicos (UICEC-HUVR),  
42  
43 Hospitales Universitario Virgen del Rocío y Virgen Macarena, Sevilla,  
44  
45 Spain.  
46
- 47  
48 3. Farmacología Clínica, Hospital Universitario Virgen del Rocío, Sevilla,  
49  
50 Spain.  
51
- 52  
53 4. Unidad Clínica de Farmacia. Hospitales Universitarios Virgen Macarena,  
54  
55 Sevilla, Spain.  
56  
57  
58  
59  
60

1  
2  
3 26 \* Members of the Simplify Study Group are listed in Acknowledgements.  
4  
5 27  
6  
7 28 **Author for correspondence:** Luis Eduardo López Cortés  
8  
9 29 **Email:** luiselopezcortes@gmail.com  
10  
11 30  
12  
13 31

14  
15  
16 32 **ABSTRACT**

17  
18 33 **Introduction:** Within the context of antimicrobial stewardship programs, de-  
19  
20 34 escalation of antimicrobial therapy is one of the proposed strategies for  
21  
22 35 reducing the unnecessary use of broad-spectrum antibiotics (BSA). The  
23  
24 36 empirical treatment of nosocomial and some health-care associated  
25  
26 37 bloodstream infections (BSI) frequently includes a beta-lactam with  
27  
28 38 antipseudomonal activity as monotherapy or in combination with other drugs, so  
29  
30 39 there is a great opportunity to optimize the empirical therapy based on  
31  
32 40 microbiological data. De-escalation is assumed as standard-of-care for experts  
33  
34 41 in infectious diseases; However, it is less frequent than it would be desirable.  
35  
36  
37

38 42 **Methods and analysis:** The SIMPLIFY trial is a multicenter, open-label, non-  
39  
40 43 inferiority phase III randomized controlled clinical trial, designed as a pragmatic  
41  
42 44 'real-practice' trial. The aim of this trial is to demonstrate the non-inferiority of  
43  
44 45 de-escalation from an empirical beta-lactam with antipseudomonal activity to a  
45  
46 46 targeted narrow-spectrum antimicrobial in patients with BSI due to  
47  
48 47 *Enterobacteriaceae*. The primary outcome is clinical cure, which will be  
49  
50 48 assessed at the test of cure visit. It will be conducted at 19 Spanish public and  
51  
52 49 university hospitals.  
53  
54  
55  
56  
57  
58  
59  
60

1  
2  
3 50 **Ethics and dissemination:** Each participating center has obtained the  
4  
5 51 approval of the Ethics Review Committee, the agreement of the Directors of the  
6  
7 52 Institutions, and authorization from the Spanish Regulatory Agency (AEMPS,  
8  
9 53 Agencia Española del Medicamento y Productos Sanitarios). Data will be  
10  
11 54 presented at international conferences and published in peer-reviewed journals.

12  
13  
14 55 **Discussion:** Strategies to reduce the use of BSA should be a priority. Most of  
15  
16 56 the studies that support de-escalation are observational, retrospective, and  
17  
18 57 heterogeneous. A recent Cochrane review stated that well-designed clinical  
19  
20 58 trials should be conducted to assess the safety and efficacy of de-escalation.

21  
22  
23 59

## 24 25 60 **REGISTRATION**

26  
27 61 Trial registration number: EudraCT number: 2015-004219-19, start date: 18  
28  
29 62 March 2016. Protocol V.2.0, dated 16 May 2016.

30  
31  
32 63

## 33 34 64 **STRENGTHS OF THIS STUDY**

- 35  
36 65 • It will be the first trial on de-escalation specifically in patients with  
37  
38 66 bacteremia due to *Enterobacteriaceae*.
- 39  
40 67 • It will include patients independently of the source of bacteraemia or  
41  
42 68 severity of clinical presentation.
- 43  
44 69 • A remote automatic randomisation system and external evaluation by  
45  
46 70 blinded investigators were used to avoid bias.
- 47  
48 71 • It has been designed with daily clinical practice in mind.

49  
50  
51 72

## 52 53 73 **LIMITATIONS OF THIS STUDY**

- 54  
55 74 • The open-label design is theoretically more prone to bias.

56  
57  
58 75



- 1  
2  
3 75 • Switching to oral therapy could potentially reduce the number of days in  
4  
5 76 which patients are assigned to one or other arm.  
6  
7 77

8  
9  
10 78 **KEYWORDS:**

11 79 De-escalation, *Enterobacteriaceae*, bloodstream infection, broad-spectrum  
12  
13 80 antibiotics, antimicrobial stewardship.  
14  
15  
16  
17  
18  
19  
20  
21  
22  
23  
24  
25  
26  
27  
28  
29  
30  
31  
32  
33  
34  
35  
36  
37  
38  
39  
40  
41  
42  
43  
44  
45  
46  
47  
48  
49  
50  
51  
52  
53  
54  
55  
56  
57  
58  
59  
60

For peer review only

## 82 BACKGROUND

83

84 The worldwide spread of antimicrobial resistance is recognised as a current  
85 global public health threat. The implementation of stewardship programs for  
86 optimizing antibiotic use has been shown both to improve antibiotic use and  
87 also to help combat antimicrobial resistance [1]. Streamlining or de-escalation of  
88 antimicrobial therapy is a strategy proposed to reduce the unnecessary use of  
89 broad-spectrum antimicrobials (BSA) [1,2]. This can be carried out by changing  
90 from combination therapy to monotherapy or by replacing the empirical  
91 antibiotic with one with a narrower spectrum of activity, irrespective of the  
92 microbiology results [1].

93 Bloodstream infections (BSI) are known to be major causes of morbidity and  
94 mortality. They represent suitable organisms for carrying out a de-escalation  
95 strategy because they are very frequent, a high proportion of patients are  
96 treated with BSA and the susceptibility of the causative organisms is known.

97 The *Enterobacteriaceae* as a group, is the most common cause of community-  
98 and nosocomial BSI, with a crude associated mortality of around 15% [3]. The  
99 empirical treatment for nosocomial and some healthcare-associated BSI  
100 frequently includes a beta-lactam antibiotic with antipseudomonal activity in  
101 monotherapy or in combination. This imposes strong selection pressure,  
102 particularly on *Pseudomonas aeruginosa* isolates, and maybe selecting  
103 multidrug resistant *Enterobacteriaceae* isolates. De-escalation according to  
104 microbiological results is assumed as standard-of-care by most infectologists;  
105 however, the reality is that de-escalation is much less frequent than is desirable  
106 [4,5]. Some of the possible reasons for this phenomenon [6-8] include the fact

1  
2  
3 107 that the safety and efficacy of this treatment strategy are based only on a few  
4  
5 108 observational studies [9,10] and expert recommendations [11,12]. This was  
6  
7 109 supported by a recent Cochrane review [13] conducted among adults with  
8  
9 110 sepsis, severe sepsis or septic shock, whose authors concluded that there is no  
10  
11 111 adequate direct evidence that de-escalation of antimicrobial agents is effective  
12  
13 112 and safe in this scenario. Randomized clinical trials of their safety and efficacy  
14  
15 113 are needed, in order to establish “proof of concept” and help make clinical  
16  
17 114 decisions.  
18  
19  
20  
21  
22  
23

## 24 25 117 **METHODS/DESIGN**

### 26 27 118 28 29 119 **Study hypothesis**

30  
31 120 The aim of the trial is to demonstrate that de-escalation from empirical therapy  
32  
33 121 with an antipseudomonal beta-lactam to a targeted therapy is as effective and  
34  
35 122 safe in patients with BSI due to *Enterobacteriaceae* as continuing with the  
36  
37 123 empirical regimen.  
38  
39  
40  
41

### 42 43 124 44 125 **Design**

45 126 The SIMPLIFY trial is a multicenter, open-label, phase III randomized controlled  
46  
47 127 clinical trial, powered to demonstrate the non-inferiority of de-escalation with  
48  
49 128 respect to continuing with the antipseudomonal agent and designed as a real-  
50  
51 129 world pragmatic trial. It was developed in accordance with an extension of the  
52  
53 130 SPIRIT statement for reporting non-inferiority, superiority and equivalence trials  
54  
55 131 [14,15].  
56  
57  
58  
59  
60

1  
2  
3 132  
4

5 133 **Participants and settings**

6  
7 134 The trial will be conducted at 19 public and tertiary hospitals with the support of  
8  
9 135 the Spanish Network for Research in Infectious Diseases (REIPI) and the  
10  
11 136 Spanish Clinical Research Network (SCReN). Thirteen of them are University  
12  
13 137 hospitals. Patients will be evaluated for eligibility once *Enterobacteriaceae* is  
14  
15 138 isolated from blood cultures and susceptibility data are available. Detection of  
16  
17 139 eligible patients will be by daily review of blood culture results by the bacteremia  
18  
19 140 team at each center. To be enrolled, participants will need to fulfill all inclusion  
20  
21 141 and exclusion criteria (Table 1) plus give written informed consent (the patient  
22  
23 142 or a legally authorized representative).  
24  
25  
26

27 143

28  
29 144 **Table 1. Inclusion and exclusion criteria**

30  
31  
32 **Inclusion criteria**

- 33  
34 1. Written informed consent has been obtained from the patient or the  
35  
36  
37  
38  
39 2. Age  $\geq$  18 years, not legally incapacitated.  
40  
41 3. Hospitalised patients with monomicrobial bacteremia due to  
42  
43  
44  
45  
46  
47  
48  
49  
50  
51  
52  
53  
54  
55  
56  
57  
58  
59  
60
- Written informed consent has been obtained from the patient or the legally authorised representative.
  - Age  $\geq$  18 years, not legally incapacitated.
  - Hospitalised patients with monomicrobial bacteremia due to *Enterobacteriaceae* from any source.
  - The patient has received active empiric antibiotic therapy with an antipseudomonal beta-lactam (imipenem, meropenem, piperacillin-tazobactam, cefepime, ceftazidime, aztreonam), alone or in combination with another antimicrobial agent, which started in the first 24 hours after the first positive blood culture was taken.
  - The isolate is susceptible to at least one of antibiotics included in the

1  
2  
3  
4  
5  
6  
7  
8  
9  
10  
11  
12  
13  
14  
15  
16  
17  
18  
19  
20  
21  
22  
23  
24  
25  
26  
27  
28  
29  
30  
31  
32  
33  
34  
35  
36  
37  
38  
39  
40  
41  
42  
43  
44  
45  
46  
47  
48  
49  
50  
51  
52  
53  
54  
55  
56  
57  
58  
59  
60

experimental arm.

6. Intravenous antimicrobial treatment is planned for at least 5 days once *Enterobacteriaceae* is isolated from the blood culture.

#### Exclusion criteria

1. Life expectancy <30 days.
2. Pregnancy or nursing. For included women: failure to use a highly effective contraceptive method.
3. Isolation of carbapenemase-producing *Enterobacteriaceae* (because most hospitals do not use monotherapy in these cases).
4. Inclusion is delayed >48 h after susceptibility data of the isolate are available.
5. Severe neutropenia (<500 cells/mm<sup>3</sup>) on the day of randomization.
6. Planned duration of treatment >28 days (e.g. osteomyelitis, endocarditis).

145

146

#### 147 Randomization

148 Stratified randomization in a 1:1 ratio will be achieved using a centralized, web-  
149 based automated randomization system integrated with the eCRF (electronic  
150 Case Report Form) to manage assignment to the treatment arms. A copy of the  
151 randomization list will be kept in a safe place in case technical problems arise.  
152 The only criterion for stratification will be source of bloodstream infection  
153 (urinary tract vs any other) in order to ensure that the percentage of patients  
154 with urinary tract infections is similar in the two groups being compared. To  
155 guarantee an appropriate allocation concealment in an open trial, randomization

1  
2  
3 156 will not be stratified by site.  
4  
5

6 157

7 158 **Intervention**

8  
9 159 A decision tree of enrolment to the study is included in Figure 1. As stated  
10  
11 160 above, all included patients will already be receiving an antipseudomonal beta-  
12  
13 161 lactam (meropenem, imipenem, piperacillin-tazobactam, cefepime, ceftazidime  
14  
15 162 or aztreonam) before randomization occurs. Patients will be allocated to one of  
16  
17 163 the following treatment arms:  
18  
19

20 164

21 165 Experimental group:

22  
23 166 The patient will change to an intravenous therapy with an active narrow-  
24  
25 167 spectrum antibiotic according to the susceptibility results (EUCAST or CLSI  
26  
27 168 criteria); the antibiotic will be chosen in the following order (the first active drug  
28  
29 169 will be used): (1) ampicillin, 2 g q6h; (2) trimethoprim/sulfamethoxazole,  
30  
31 170 160/800 mg q8-12h; (3) cefuroxime, 750-1500 mg q8h; (4) cefotaxime 1-2g q8h  
32  
33 171 or ceftriaxone, 1 g q12-24h; (5) amoxicillin/clavulanate, 1g/125 mg q8h; (6)  
34  
35 172 ciprofloxacin, 400 mg q12h; and (7) ertapenem, 1g q24h.  
36  
37 173 Trimethoprim/sulfamethoxazole will only be used in urinary tract infections in the  
38  
39 174 absence of an undrained renal abscess. Ciprofloxacin is included because,  
40  
41 175 apart from being active against *P. aeruginosa*, it is not a beta-lactam.  
42  
43  
44  
45  
46

47 176

48  
49 177 Control group:

50  
51 178 Continuation of the antipseudomonal beta-lactam that was being administered  
52  
53 179 on an empirical basis: meropenem, 1-2 g q8h; imipenem, 0.5-1g q6h;  
54  
55 180 piperacillin-tazobactam, 4/0.5 g q6-8h; cefepime, 2 g q8-12h; ceftazidime, 1-2 g  
56  
57  
58  
59  
60

1  
2  
3 181 q8h; and aztreonam, 1-2 g q8h.

4  
5 182

6  
7 183 Exceptions to the above rule:

8  
9 184 Third-generation cephalosporins should be avoided where there are inducible

10  
11 185 AmpC  $\beta$ -lactamase-producing *Enterobacteriaceae* (*Enterobacter* spp.,

12  
13 186 *Providencia* spp., *Morganella morganii*, *Serratia marcescens*, and *Citrobacter*

14  
15 187 *freundii*); hence, even if the isolates are strictly susceptible, for patients in the

16  
17 188 control group, ceftazidime may be changed to any other antipseudomonal beta-

18  
19 189 lactam on the day of randomization. For patients allocated to the experimental

20  
21 190 arm, the options will be limited to trimethoprim/sulfamethoxazole, ciprofloxacin

22  
23 191 or ertapenem.

24  
25 192 ESBL producers could be included in the study based on attending physician's

26  
27 193 criteria; in this cases, maximum doses of susceptible antibiotics are

28  
29 194 recommended.

30  
31 195

32  
33 196 Dose adjustment

34  
35 197 Due to the nature of the study design as a real-world clinical practice trial,

36  
37 198 antimicrobial dosage will be as deemed by the treating clinician, dependent on

38  
39 199 pharmacokinetic and pharmacodynamic (PK/PD) characteristics (such as higher

40  
41 200 doses for septic shock or high body mass). Dose adjustment will be made for all

42  
43 201 drugs as necessary in the case of renal or hepatic dysfunction, following

44  
45 202 Summary of Product Characteristics (SmPC) recommendations.

46  
47 203

48  
49 204 Concomitant therapy

50  
51 205 Even if the BSI is monomicrobial, the attending physician may consider the

1  
2  
3 206 infection to be polymicrobial at source. If additional anaerobic or gram-positive  
4  
5 207 coverage is needed, concomitant use of oral metronidazole, clindamycin,  
6  
7 208 vancomycin, teicoplanin, daptomycin or linezolid is allowed in both arms.  
8  
9 209 Concomitant treatment with any other systemic antibiotic with intrinsic activity  
10  
11 210 against gram-negative bacilli is not allowed. The administration of any of these  
12  
13 211 drugs while the patient is receiving the study drug will be deemed a criterion for  
14  
15 212 withdrawal. There are no absolute contraindications for the use of any other  
16  
17 213 drug during the study. However, contraindications, warnings and precautions for  
18  
19 214 use and possible interactions with study drugs are to be taken into account.  
20  
21  
22

23 215

24  
25 216 Duration of therapy

26  
27 217 The appropriate duration of therapy is considered to be between 7 and 14 days,  
28  
29 218 according to the attending physician's criteria. Treatments lasting longer than  
30  
31 219 14 days will be allowed only when there is an undrained abscess present, in  
32  
33 220 which case, a 4-week treatment is permitted.  
34  
35

36 221

37  
38 222 Route of administration

39  
40 223 Switching to oral therapy is allowed after the third day of therapy after  
41  
42 224 randomisation if all the following conditions are fulfilled: clinical improvement  
43  
44 225 has been achieved, absence of fever ( $>38^{\circ}\text{C}$ ), hemodynamic stability, adequate  
45  
46 226 control of the source of BSI and absence of secondary foci, adequate oral  
47  
48 227 intake, and no gastrointestinal conditions that might compromise drug  
49  
50 228 absorption.  
51

52  
53 229 For patients in the experimental group, switching to oral therapy is allowed with  
54  
55 230 the same intravenous drugs as follows: trimethoprim/sulfamethoxazole 160/800  
56  
57  
58  
59  
60



1  
2  
3 231 mg q8 -12h, cefuroxime axetil 500 mg q8-12h, amoxicillin/clavulanate 875/125  
4  
5 232 mg q8h, or ciprofloxacin 500 mg q12h. If the intravenous drug is ampicillin,  
6  
7 233 amoxicillin 1 g q8h will be used; if cefotaxime or ceftriaxone, then ceftibuten 400  
8  
9 234 mg q12-24h or cefixime 400 mg q12-24h will be used; if ertapenem, this drug  
10  
11 235 may be switched to the intramuscular route.

12  
13  
14 236 For patients in the control group, the preferred oral option is ciprofloxacin 500  
15  
16 237 mg q12h for all patients. The protocol allows treatment with cefuroxime-axetil  
17  
18 238 500 mg q8-12h or cefixime 400 mg q12-24h only in cases of resistance to  
19  
20 239 ciprofloxacin; finally, parenteral ertapenem 1g q24h may be used for  
21  
22 240 convenience if the isolate is resistant to all other oral options.

23  
24  
25 241

26  
27 242 Rescue medication

28  
29 243 No rescue medication is planned on behalf of the study if a patient has to  
30  
31 244 withdraw from the trial for any reason; the attending physician will follow clinical  
32  
33 245 guidelines for routine clinical practice and GCP (Good clinical practice) rules.

34  
35  
36 246

37  
38 247 Medication

39  
40 248 As all the study drugs are recommended for BSI caused by *Enterobacteriaceae*,  
41  
42 249 the sponsor will not provide the study drugs [16]. Every site participating in the  
43  
44 250 study is authorised to use the drugs through the normal provision of its hospital  
45  
46 251 pharmacy.

47  
48  
49 252

50  
51 253 Schedule of visits

52  
53 254 Patients included in the study will be followed for 60 days ( $\pm$  5 days) after  
54  
55 255 diagnosis of the BSI (Figure 2). Follow-up will be organised in seven planned

1  
2  
3 256 visits at day 0 (baseline), day 1; day 3-5; day 7-14 (end of treatment); day 3-5  
4  
5 257 from end of treatment (test of cure, TOC); day 30 ± 5; and day 60 ± 5. Visits at  
6  
7 258 days 30 and 60 may be made by telephone.  
8

9  
10 259 The visit schedule is planned so as to obtain data on clinical status, sample  
11  
12 260 collection, efficacy and safety variables, and adverse events. At the final  
13  
14 261 evaluation at 60 days, data on all outcome variables will be gathered.  
15  
16 262 Additionally, data will be collected at unplanned visits, with special  
17  
18 263 consideration given to the occurrence of any adverse event or recurrence.  
19

20  
21 264

## 22 23 265 **Outcomes**

24  
25 266 The primary outcome is clinical cure, which will be assessed at the TOC visit (3-  
26  
27 267 5 days after the end of antibiotic treatment). Death during treatment, change of  
28  
29 268 antibiotic therapy due to clinical failure, or need to prolong the treatment will be  
30  
31 269 considered as failures. Secondary outcomes include early (5 days after end of  
32  
33 270 treatment) and late (60-day) clinical and microbiological response, all-cause  
34  
35 271 mortality (days 7, 14, and 30), length of hospital stay, recurrence rates (relapse  
36  
37 272 or reinfection) (day 60), safety of antibiotic treatment, including *Clostridium*  
38  
39 273 *difficile* infections and number of antibiotic treatments with an antipseudomonal  
40  
41 274 beta-lactam; in a subgroup of patients, the rate of intestinal colonization by *P.*  
42  
43 275 *aeruginosa* resistant to carbapenemase or piperacillin / tazobactam,  
44  
45 276 *Stenotrophomonas* spp., multiresistant *A. baumannii* and enterobacteria  
46  
47 277 producing ESBL, carbapenemase and chromosomal AmpC (hyperproduction)  
48  
49 278 or plasmid will be sought. Some of these secondary outcomes will be analyzed  
50  
51 279 as composite variables, following the DOOR/RADAR methodology. Outcome  
52  
53 280 definitions, assessment, and time frames for measurement are described in  
54  
55  
56  
57  
58  
59  
60

1  
2  
3 281 Table 2.

4  
5 282 **Table 2. Outcome definitions and time frames**  
6  
7  
8  
9

| Primary End Point and Time Frame                                                                                              | Definition and Assessment                                                                                                                                                                                                                                                                                                                                                           |
|-------------------------------------------------------------------------------------------------------------------------------|-------------------------------------------------------------------------------------------------------------------------------------------------------------------------------------------------------------------------------------------------------------------------------------------------------------------------------------------------------------------------------------|
| CLINICAL CURE<br>Day 3-5 after treatment*                                                                                     | TOC, the situation where all the following conditions are met: survival at the time of the evaluation; complete resolution of all symptoms and signs of infection (or return to the situation prior to current infection); no need for prolonged antibiotic treatment beyond the recommended duration* and no need for treatment modification due to unfavorable clinical response. |
| *7-14 days according to IDSA, except in the presence of undrained or late-draining abscesses, when up to 4 weeks are allowed. |                                                                                                                                                                                                                                                                                                                                                                                     |
| Secondary End Point and Time Frame                                                                                            | Definition and Assessment                                                                                                                                                                                                                                                                                                                                                           |
| CLINICAL RESPONSE<br>After 5 days of treatment (early response)<br>Until Day 60 of follow-up (late response)                  | Same as clinical cure                                                                                                                                                                                                                                                                                                                                                               |
| MICROBIOLOGICAL CURE<br>After 5 days of treatment (early response)                                                            | Negative blood cultures and where applicable, negative                                                                                                                                                                                                                                                                                                                              |

|                                                                                             |                                                                                                                                                                                                                          |
|---------------------------------------------------------------------------------------------|--------------------------------------------------------------------------------------------------------------------------------------------------------------------------------------------------------------------------|
| <p>Until Day 60 of follow-up (late response)</p>                                            | <p>cultures from samples taken from initial infection focus.</p> <p>'PRESUMPTIVE MICROBIOLOGIC CURE' is accepted in those cases where it is not possible to prove the negativization of isolates from initial focus.</p> |
| <p>ALL-CAUSE MORTALITY</p> <p>7, 14 and 60-day of follow-up</p>                             | <p>Death for any reason</p>                                                                                                                                                                                              |
| <p>LENGTH OF HOSPITAL STAY</p>                                                              | <p>Time from randomisation to hospital discharge</p>                                                                                                                                                                     |
| <p>CLINICAL RECURRENCE (RELAPSE OR REINFECTION) RATES</p> <p>60-day of follow-up</p>        | <p>Recurrence of at least one clinical and one analytical sepsis criterion, with presence or absence of bacteraemia</p>                                                                                                  |
| <p>MICROBIOLOGICAL RECURRENCE (RELAPSE OR REINFECTION) RATES</p> <p>60-day of follow-up</p> | <p>New BSI episode with the same isolate as initial cultures with previously clinical and microbiological cure</p>                                                                                                       |
| <p>NUMBER OF DAYS OF APBL AVOIDED</p> <p>Until end of treatment</p>                         | <p>Number of days of antibiotic treatment with an antipseudomonal beta-lactam (APBL) avoided</p>                                                                                                                         |

|                                                                          |                                                                                                                                                                                                                                     |
|--------------------------------------------------------------------------|-------------------------------------------------------------------------------------------------------------------------------------------------------------------------------------------------------------------------------------|
| <p>ECOLOGICAL IMPACT</p> <p>7-14, 12-21, 30 days</p>                     | <p>Intestinal colonization by multidrug-resistant Gram-negative bacilli</p>                                                                                                                                                         |
| <p>SAFETY OF DRUGS - adverse events</p> <p>Until Day 60 of follow-up</p> | <p>Any untoward medical occurrence associated with the use of a drug in humans, whether or not considered drug-related.</p>                                                                                                         |
| <p>COMPOSITE SECONDARY VARIABLES</p> <p>7-14, 60-day follow up</p>       | <p>Survival on day 14, number of days with an antipseudomonal beta-lactam avoided, presence or absence of side effects, including <i>C. difficile</i> infections, secondary MDRO infections and all drug-related adverse events</p> |

283

284

### 285 **Data collection, management and monitoring**

286 The coordinating center for this study is the Hospital Universitario Virgen  
 287 Macarena, Seville, Spain, and the Clinical Trials Unit (CTU-Hospital  
 288 Universitario Virgen del Rocío) has delegated sponsor functions on behalf of  
 289 the Fundación Pública Andaluza para la Gestión de la Investigación en Salud  
 290 de Sevilla (FISEVI - <http://www.fisevi.com>). Clinical research associates (CRAs)  
 291 connected to the Spanish Clinical Research Network (SCReN) in public  
 292 hospitals will carry out monitoring activities. Data collection will be conducted by  
 293 trained staff at each participating center and entered into a restricted access

1  
2  
3 294 electronic case report form (eCRF). Outstanding queries regarding the  
4  
5 295 completion of the CRF will be sent to all participating centers as necessary to  
6  
7 296 ensure accuracy of data.  
8

9  
10 297 In order to avoid any association with personal data, all study samples will be  
11  
12 298 anonymous and identifiable only by the patient's alphanumeric study code. The  
13  
14 299 objective and management of these samples are included in the patient's  
15  
16 300 information sheet and informed consent form.  
17

18  
19 301 The quality of all data collected will be carefully supervised by the CTU and  
20  
21 302 specific visits for source data verification are organized according to the  
22  
23 303 monitoring plan. Furthermore, in order to minimize bias, at the interim analysis  
24  
25 304 (when 50% of the sample has been included), an independent committee (3  
26  
27 305 independent investigators from the REIPI) blinded to treatment assignment will  
28  
29 306 review all accumulated data. This committee will advise the sponsor on the  
30  
31 307 appropriateness of continuing the clinical trial as designed.  
32  
33

34 308

### 35 36 309 **Isolates**

37  
38 310 All isolates will be sent to the central laboratory in the Hospital Universitario  
39  
40 311 Virgen Macarena in Seville for susceptibility testing using reference methods  
41  
42 312 and PCR characterisation and sequencing if necessary.  
43  
44

45 313 Eight selected hospitals will participate in the study of rectal carriage of ESBL-  
46  
47 314 AmpC- and carbapenemase-producing *Enterobacteriaceae*, by taking rectal  
48  
49 315 swabs from participants at different times (as set out in the schedule of visits).

50  
51 316 To do this, samples will be taken by rectal swab from the patients of both  
52  
53 317 treatment arms on the day of randomization, the day when treatment finish, the  
54  
55 318 day of test of cure, and visit of day 30. The presence of *P. aeruginosa* resistant  
56  
57  
58  
59  
60

1  
2  
3 319 to carbapenemase or piperacillin / tazobactam, *Stenotrophomonas* spp.,  
4  
5 320 multiresistant *A. baumannii* and enterobacteria producing ESBL,  
6  
7 321 carbapenemase and chromosomal AmpC (hyperproduction) or plasmid will be  
8  
9 322 sought. A written consent form for samples, approved by the ECs (Ethics  
10  
11 323 Committees), is also provided for the study.

12  
13  
14 324

#### 15 325 **Definition of analysis population and outcome measures**

16  
17 326 The following populations will be considered: the intention-to-treat population  
18  
19 327 (ITTP) includes all randomized patients; the modified ITTP (mITTP) includes  
20  
21 328 randomized patients who have received at least one dose of intravenous  
22  
23 329 antibiotics; the clinically evaluable population (CEP) includes patients who have  
24  
25 330 completed 5 days of the intravenous study drug, or who die but have received  
26  
27 331 at least one dose of intravenous antibiotics. The clinically and microbiologically  
28  
29 332 evaluable population (CMEP) includes those in the CEP who have had  
30  
31 333 microbiological tests (at least one blood culture 48 hours after randomization).

32  
33  
34 334 The local principal investigator in the centre where the patient was included will  
35  
36 335 assess the primary outcome (clinical cure) in the clinically evaluable population  
37  
38 336 (CEP) at TOC. Due to the intrinsic characteristics of the primary outcome (soft  
39  
40 337 outcome) and the study methodology (non-blinded), this evaluation done will be  
41  
42 338 reviewed later on the basis of clinical data recovered on two occasions by an  
43  
44 339 external blinded investigator: firstly, during the interim analysis to monitor  
45  
46 340 safety; secondly before the complete cleaning and closure of the eCRF. For  
47  
48 341 secondary end points, the CMEP will be eligible for early (day 5) and late (day  
49  
50 342 60) microbiological responses, the m-ITTP for all-cause mortality and length of  
51  
52 343 hospital stay, and the CEP for the evaluation of recurrence rates and drug  
53  
54  
55  
56  
57  
58  
59  
60

1  
2  
3 344 safety.  
4  
5 345  
6  
7 346 **Sample size**  
8  
9  
10 347 The sample size was calculated using Epidat 4.0. Some of the data used to  
11  
12 348 calculate it was derived from the study published by Retamar *et al* [17].  
13  
14 349 Assuming estimated clinical cure rates of 85% in both groups, a non-inferiority  
15  
16 350 margin of 10% difference between the 2 groups, and treatment assignment in a  
17  
18 351 1:1 ratio, 344 patients in total (172 per study arm) are needed to achieve 80%  
19  
20 352 power with a significance level of 5%. This allows for a 5% dropout rate. The  
21  
22 353 10% non-inferiority margin was chosen as in recent trials of complicated urinary  
23  
24 354 tract and intraabdominal infections [18,19].  
25  
26 355  
27  
28  
29 356 **Statistical analysis**  
30  
31  
32 357 Absolute differences will be calculated with 95% confidence intervals for the  
33  
34 358 clinical cure rate between the two arms of the study at TOC. Multivariate  
35  
36 359 analysis using logistic regression for the main outcome will be performed in  
37  
38 360 order to ensure the independence of the treatment effect. Special consideration  
39  
40 361 will be given in the multivariate analysis to the center of origin of the study  
41  
42 362 sample. A Cox regression analysis of mortality until 60 days will be performed  
43  
44 363 on the mITTP. For the superiority analysis, logistic regression will be used  
45  
46 364 sequentially, using the methodology recently published by Evans et al [20] for  
47  
48 365 the composite variable (DOOR and RADAR analysis using survival at day 14,  
49  
50 366 number of days of antipseudomonal beta-lactam treatment avoided, presence  
51  
52 367 or absence of side effects, including *C. difficile* infections, secondary MDRO  
53  
54  
55  
56  
57  
58  
59  
60



1  
2  
3 368 infections, and all drug-related adverse events). Antimicrobial doses are not  
4  
5 369 fixed and sensitivity analyses will therefore be applied to control potential bias.  
6

7 370

8  
9  
10 371 **Protocol violations**

11 372 All protocol violations occurring after randomization will be listed in the Clinical  
12  
13 373 Study Report, tabulated by subject and by recruitment center.  
14

15 374

16  
17 375

18  
19  
20 376 **ETHICAL ISSUES**

21  
22 377 Each of the participating centers has obtained the approval of an Ethics Review  
23  
24 378 Committee, the agreement of the Directors of the Institutions (who signed the  
25  
26 379 contract of agreement with the sponsor of the study) and authorisation from the  
27  
28 380 Spanish Regulatory Agency (AEMPS, Agencia Española del Medicamento y  
29  
30 381 Productos Sanitarios). Patients may withdraw from the study at any time without  
31  
32 382 prejudice, as is documented and explained at the time of providing consent.  
33

34  
35 383 The study will be carried out according to the principles of the Declaration of  
36  
37 384 Helsinki, and Directive 2001/20/EC of the European Parliament and of the  
38  
39 385 Council of 4 April 2001 on the harmonization of the laws, regulations and  
40  
41 386 administrative provisions of the Member States relating to the implementation of  
42  
43 387 Good Clinical Practice in the conduct of clinical trials on medicinal products for  
44  
45 388 human use until the new Clinical Trials Regulation (CTR) EU No 536/2014  
46  
47 389 becomes applicable, which will be no earlier than 28 May 2016. The  
48  
49 390 confidentiality of records that might identify subjects in this study will be  
50  
51 391 protected in accordance with EU Directive 2001/20/EC. All laws for the control  
52  
53 392 and protection of personal information will be carefully followed. The identities of  
54  
55  
56  
57  
58  
59  
60

1  
2  
3 393 patients will not be disclosed in the e-CRF; names will be replaced by an  
4  
5 394 alphanumeric code and any material related to the trial, such as samples, will  
6  
7 395 be identified in the same way, so that no personal information will be revealed.  
8  
9  
10 396

## 11 397 **DISCUSSION**

12  
13  
14 398 The extensive use of BSA and the dramatic increase in infections due to  
15  
16 399 multidrug-resistant organisms are forcing the scientific community to look for  
17  
18 400 strategies to combat this situation. In the real world, the application of de-  
19  
20 401 escalation to serious infections is less frequent than is desirable. The  
21  
22 402 arguments against de-escalation include: (1) the MIC of some narrow-spectrum  
23  
24 403 drugs are closer to susceptibility breakpoints than carbapenems, for example,  
25  
26 404 and some physicians may therefore feel safer using the latter; (2)  
27  
28 405 subpopulations resistant to narrow-spectrum drugs may be selected and appear  
29  
30 406 after some days of empirical treatment, leading to treatment failure in case of  
31  
32 407 de-escalation; (3) in the case of polymicrobial infections, it is not uncommon for  
33  
34 408 only one of the pathogens to be isolated in blood cultures, so that simplification  
35  
36 409 of treatment may be less safe and effective than a broad-spectrum treatment;  
37  
38 410 (4) there is some doubt about the real effectiveness of certain drugs against  
39  
40 411 isolates producing specific mechanisms of resistance. Furthermore, although it  
41  
42 412 is assumed that BSA has a greater impact on the selection of multidrug-  
43  
44 413 resistant strains, some studies suggest that it may depend more on the duration  
45  
46 414 of the treatment than the spectrum [16]. While none of these arguments have  
47  
48 415 been proven, it is also true that there is no strong evidence for the safety of de-  
49  
50 416 escalation strategies in these scenarios.  
51  
52  
53  
54  
55  
56  
57  
58  
59  
60

1  
2  
3 417 To the best of our knowledge, three randomized trials on de-escalation  
4  
5 418 strategies, none of them specifically focused on bacteremia, have been  
6  
7 419 published, which show significant differences from this study [21-23]. The one  
8  
9 420 published by Falguera *et al* [22] compared the efficacy of empirical versus  
10  
11 421 targeted treatment on the basis of urine antigen results in hospitalized patients  
12  
13 422 with community-acquired pneumonia. The article published by Kim *et al* [23]  
14  
15 423 evaluated the efficacy of early use of imipenem/cilastatin and vancomycin  
16  
17 424 followed by de-escalation versus conventional antimicrobials without de-  
18  
19 425 escalation for patients with hospital-acquired pneumonia in ICUs. The last one,  
20  
21 426 published recently by Leone *et al* [24], included a limited number (n=116) of  
22  
23 427 ICU-admitted patients with severe sepsis; Its primary outcome was duration of  
24  
25 428 ICU stay, and not effectiveness of both treatment strategies. In that study, de-  
26  
27 429 escalation followed the recommendations of guidelines, not a pre-specified  
28  
29 430 protocol based on the clinical impact of the antibiotics. There was no significant  
30  
31 431 difference in mortality, although unexpectedly, patients in the experimental arm  
32  
33 432 had a higher rate of superinfections (27% vs 11%,  $P = 0.03$ ). These results  
34  
35 433 contrast with a recent systematic review and meta-analysis that included 25  
36  
37 434 studies with data on de-escalation based on culture results, which showed a  
38  
39 435 significant reduction in the relative risk of death (RR 0.44, 95% CI: 0.30–0.66;  
40  
41 436  $p < 0.0001$ ). It is important to note that many of the included studies in the meta-  
42  
43 437 analysis were observational, retrospective and had a high degree of  
44  
45 438 heterogeneity [25].

46  
47 439 Several authors have warned about the considerable inconsistencies in  
48  
49 440 definitions of de-escalation. In 2015, Weiss *et al* [26] elaborated a consensual  
50  
51 441 definition of de-escalation that allowed beta-lactams to be ranked according to  
52  
53  
54  
55  
56  
57  
58  
59  
60

1  
2  
3 442 both their spectra and their ecological impact. The authors underlined  
4  
5 443 the difficulty of reaching consensus on the relative ecological impact of each  
6  
7 444 individual drug. In 2014, Madaras-Kelly *et al.* [27] used the Delphi approach to  
8  
9 445 develop an antibiotic spectrum score to measure de-escalation. We shall  
10  
11 446 therefore include both concepts in our analysis, using Outcome Ranking  
12  
13 447 (DOOR) and Response Adjusted for Duration of Antibiotic Risk (RADAR)  
14  
15 448 analyses [20].

16  
17  
18 449 Switching from intravenous to oral therapy as soon as the patient is clinically  
19  
20 450 stable can reduce the risk of adverse events related to intravenous therapy,  
21  
22 451 length of hospitalization, and cost. It can be applied regardless of the source of  
23  
24 452 infection and underlying conditions whenever a good option that achieves the  
25  
26 453 PK/PD targets is available [28]. In our study, switching to oral therapy is allowed  
27  
28 454 in both arms to avoid exposing patients in the control arm to unnecessary risks.  
29  
30 455 The SIMPLIFY trial has several strengths. In the first place, it will be the first trial  
31  
32 456 on de-escalation specifically in patients with bacteremia due to  
33  
34 457 *Enterobacteriaceae*. Second, it will include patients independently of the source  
35  
36 458 of bacteraemia or severity of clinical presentation. Third, it was designed with  
37  
38 459 daily clinical practice in mind. We hope that, if there is reasonable evidence to  
39  
40 460 reject the null hypothesis, it will encourage implementation of this type of  
41  
42 461 strategy in daily practice.  
43  
44  
45  
46

47  
48  
49

#### 50 TRIAL STATUS

- 51  
52 464 • Funding for the study was approved on 15/08/2015 and available for  
53  
54 465 study expenses in 01/01/2016.  
55  
56 466 • EC approval for the 19 sites included was obtained on 15th March 2016.  
57  
58  
59  
60

1  
2  
3 467 • Authorization from the Spanish Regulatory Authority was obtained on  
4  
5 468 18th March 2016.

6  
7 469 • The study has been approved for a recruitment period of 2 years.

8  
9 470 • Dissemination of results directed to patients will be channeled through  
10  
11 471 the Spanish Clinical Studies Registry (Agencia Española del  
12  
13 472 Medicamento y Productos Sanitarios), whose content is adapted to  
14  
15 473 patients.  
16  
17  
18  
19

20 474

21 475

## 22 476 **FUNDING**

23  
24  
25 477 This project is a non-commercial, investigator-driven clinical trial, funded  
26  
27 478 through public competitive call by the Instituto de Salud Carlos III (ISCIII),  
28  
29 479 document number: PI15/00439. The ISCIII is the main public research entity in  
30  
31 480 Spain and reports directly to the Ministry of Economy and Competitiveness and  
32  
33 481 in operational terms to both this Ministry and to the Ministry of Health, Social  
34  
35 482 Services and Equality. The Spanish Network for Research in Infectious  
36  
37 483 Diseases (REIPI) is funded by the Ministerio de Economía y Competitividad, the  
38  
39 484 Instituto de Salud Carlos III, integrated in the national I+D+i 2013-2016 and co-  
40  
41 485 funded by European Union (ERDF/ESF, "Investing in your future"). This study is  
42  
43 486 supported by the Spanish Clinical Research Network and funded by ISCII: study  
44  
45 487 number 16.001.

## 46 488 **Role of the funding source**

47  
48  
49 489 The funders of the study had no role in the study design or in manuscript  
50  
51 490 development.  
52  
53  
54

55 491  
56  
57  
58  
59  
60

1  
2  
3 492 **COMPETING INTERESTS ESTATEMENT**

4  
5 493 The authors have no competing interests to declare.  
6  
7 494

8  
9 495 **CONTRIBUTORSHIP STATEMENT**

10  
11 496 JR-B and LEL-C were responsible for formulating the overall research questions  
12  
13 497 and for the methodological design of the study. CR-F, BA and LL-A collaborated  
14  
15 498 in the submission of the project for the Spanish funding, and collaborated in the  
16  
17 499 methodological aspects of the study. JR-B is the coordinating investigator and  
18  
19 500 leader of the Coordination Team. CR-F is responsible for the CTU. MN-N  
20  
21 501 collaborated with writing of the manuscript and with the pharmacovigilance  
22  
23 502 design, and JB-F, PR-G, and CL collaborated in the organisation of the study.  
24  
25 503 MD contributed in all the microbiological details of the study. JR-B and LEL-C  
26  
27 504 participated in its design and supervised the project. All authors read and  
28  
29 505 approved the final manuscript.  
30  
31  
32  
33

34 506

35  
36 507 **DATA SHARING STATEMENT**

37  
38 508 No additional unpublished data from the study are available  
39  
40 509

41  
42 510 **ACKNOWLEDGEMENTS:** P. Aguilar, I.J. de la Calle, and A. Romero (Hospital  
43  
44 511 Universitario Puerto Real, Cádiz); E. Merino, V. Boix, L.Giner, J.C. Rodríguez  
45  
46 512 and A. Gimeno (Hospital Universitario de Alicante); F. Guerrero-Sánchez, A.  
47  
48 513 Martín-Aspas and F. Galán-Sánchez (Hospital Universitario Puerta del Mar,  
49  
50 514 Cádiz); D. Diez, V. Pérez-Carral and M.I. Paz (Complejo Hospitalario  
51  
52 515 Universitario de Ourense); C. Fariñas, C. Armiñanzas, C. González and C.  
53  
54 516 Ruiz de Alegría-Puig (Hospital Universitario Marqués de Valdecilla, Santander);  
55  
56  
57  
58  
59  
60

1  
2  
3 517 L. Gómez, E. Calbo and M. Xercavins-Valls (Hospital Universitario Mutua  
4  
5 518 Terrassa, Terrassa); F. García-Colchero and M. Chávez (Hospital San Juan de  
6  
7 519 Dios, Sevilla); J. Goikoetxea-Agirre, M. Montejo and L. López (Hospital  
8  
9 520 Universitario de Cruces, Barakaldo); ; G. Bou and I. Torres (Hospital  
10  
11 521 Universitario A Coruña); S. Pérez-Cortés and M.D. López-Prieto (Hospital  
12  
13 522 Universitario de Jerez); B. Loeches and M. Romero (Hospital Universitario La  
14  
15 523 Paz, Madrid); M. Ibarguren, M. A. Goenaga-Sánchez and J. M. García-  
16  
17 524 Arenzana (Hospital Universitario Donostia); J. R. Yuste and J. Leiva-León  
18  
19 525 (Clínica Universitaria de Navarra); A. Salas-Aparicio and C. de las Cuevas  
20  
21 526 (Hospital Universitario La Princesa, Madrid); J.M. Guerra-Laso and I.  
22  
23 527 Fernández-Natal (Complejo Asistencial Universitario de León); M. T. Pérez and  
24  
25 528 F. Vasallo (Xerencia de Xestión Integrada de Vigo); G. Cuervo and C. Ardanuy  
26  
27 529 (Hospital Universitario de Bellvitge); J.R. Paño and S. Salvo (Hospital Clínico  
28  
29 530 Universitario Lozano Blesa, Zaragoza); M. L. Martín-Pena and E. Ruiz de  
30  
31 531 Gospegui (Hospital Universitario Son Espases); M. del Barrio, S. Sadyrbaeva,  
32  
33 532 M. Coronel-Janeiro, M.P. Alarcón-González, and A. González-Herrero (Hospital  
34  
35 533 Universitario Virgen Macarena).  
36  
37  
38  
39  
40 534  
41  
42  
43  
44  
45  
46  
47  
48  
49  
50  
51  
52  
53  
54  
55  
56  
57  
58  
59  
60

535 **REFERENCES**

536

537 1 Rodríguez-Baño J, Paño-Pardo JR, Álvarez-Rocha L, *et al*. Programs for  
538 optimizing the use of antibiotics (PROA) in Spanish hospitals: GEIH-SEIMC,  
539 SEFH and SEMPSPH consensus document. *Enferm Infecc Microbiol Clin* 2012;  
540 30:22.e1-22.e23.

541 2 Dellit TH, Owens RC, McGowan JE Jr, *et al*; Infectious Diseases Society of  
542 America; Society for Healthcare Epidemiology of America. Infectious Diseases  
543 Society of America and the Society for Healthcare Epidemiology of America  
544 guidelines for developing an institutional program to enhance antimicrobial  
545 stewardship. *Clin Infect Dis* 2007; 44(2):159-77.

546 3 Rodríguez-Baño J, López-Prieto MD, Portillo MM, *et al*; SAEI/SAMPAC  
547 Bacteraemia Group. Epidemiology and clinical features of community-acquired,  
548 healthcare-associated and nosocomial bloodstream infections in tertiary-care  
549 and community hospitals. *Clin Microbiol Infect* 2010; 16(9):1408-13.

550 4 Paterson DL, Rice LB. Empirical antibiotic choice for the seriously ill patient:  
551 are minimization of selection of resistant organisms and maximization of  
552 individual outcome mutually exclusive? *Clin Infect Dis* 2003; 36(8):1006-12

553 5 Livermore DM. Has the era of untreatable infections arrived? *J Antimicrob*  
554 *Chemother* 2009; 64 Suppl 1:i29-36.

555 6 Khasawneh FA, Karim A, Mahmood T, *et al*. Antibiotic de-escalation in  
556 bacteremic urinary tract infections: potential opportunities and effect on  
557 outcome. *Infection*. 2014; 42(5):829-34.

558 7 Heenen S, Jacobs F, Vincent JL. Antibiotic strategies in severe nosocomial  
559 sepsis: why do we not de-escalate more often?. *Crit Care Med* 2012; 40:1404-



- 1  
2  
3 560 9.  
4  
5 561 8 Bal AM, Gould IM. Antibiotic stewardship: overcoming implementation  
6  
7 562 barriers. *Curr Opin Infect Dis* 2011; 24:357-62.  
8  
9 563 9 De Bus L, Denys W, Catteeuw J, *et al*. Impact of de-escalation of beta-lactam  
10  
11 564 antibiotics on the emergence of antibiotic resistance in ICU patients: a  
12  
13 565 retrospective observational study. *Intensive Care Med* 2016; 42(6):1029-39.  
14  
15 566 10 Mokart D, Slehofer G, Lambert J, *et al*. De-escalation of antimicrobial  
16  
17 567 treatment in neutropenic patients with severe sepsis: results from an  
18  
19 568 observational study. *Intensive Care Med* 2014; 40(1):41-9.  
20  
21 569 11 Kaye KS. Antimicrobial de-escalation strategies in hospitalized patients with  
22  
23 570 pneumonia, intra-abdominal infections, and bacteremia. *J Hosp Med* 2012;7  
24  
25 571 Suppl 1:S13-21.  
26  
27 572 12 Montravers P, Piednoir P, Allou N. De-escalation: in drug we trust. *Crit Care*  
28  
29 573 *Med* 2012 ; 40(5):1645-6.  
30  
31 574 13 Silva BN, Andriolo RB, Atallah AN, *et al*. De-escalation of antimicrobial  
32  
33 575 treatment for adults with sepsis, severe sepsis or septic shock. *Cochrane*  
34  
35 576 *Database Syst Rev* 2013; (3):CD007934.  
36  
37 577 14 Chan A-W, Tetzlaff JM, Altman DG, *et al* D. SPIRIT 2013 Statement:  
38  
39 578 Defining standard protocol items for clinical trials. *Ann Intern Med*  
40  
41 579 2013;158:200-207.  
42  
43 580 15 Chan A-W, Tetzlaff JM, Gøtzsche PC, *et al*. SPIRIT 2013 Explanation and  
44  
45 581 Elaboration: Guidance for protocols of clinical trials. *BMJ* 2013;346:e7586.16  
46  
47 582 Cisneros-Herreros JM, Cobo-Reinoso J, Pujol-Rojo M, *et al*. Guidelines for the  
48  
49 583 diagnosis and treatment of patients with bacteriemia. Guidelines of the  
50  
51 584 Sociedad Española de Enfermedades Infecciosas y Microbiología Clínica].  
52  
53  
54  
55  
56  
57  
58  
59  
60

- 1  
2  
3 585 *Enferm Infecc Microbiol Clin* 2007; 25(2):111-30.
- 4  
5 586 17 Retamar P, Portillo MM, López-Prieto MD, *et al*; SAEI/SAMPAC. Impact of  
6  
7 587 inadequate empirical therapy on the mortality of patients with bloodstream  
8  
9 588 infections: a propensity score-based analysis. *Antimicrob Agents Chemother*  
10  
11 589 2012; 56:472.
- 12  
13 590 18 Solomkin J, Hershberger E, Miller B, *et al*. Ceftolozane/tazobactam plus  
14  
15 591 metronidazole for complicated intra-abdominal infections in an era of multidrug  
16  
17 592 resistance: Results from a randomized, double-blind, phase 3 trial (ASPECT-  
18  
19 593 clAI). *Clin Infect Dis* 2015; 60(10):1462-71.
- 20  
21 594 19 Wagenlehner FM, Sobel JD, Newell P, *et al*. Ceftazidime-avibactam versus  
22  
23 595 doripenem for the treatment of complicated urinary tract infections, including  
24  
25 596 acute pyelonephritis: RECAPTURE, a phase 3 randomized trial program. *Clin*  
26  
27 597 *Infect Dis* 2016; 63(6):754-62.
- 28  
29 598 20 Evans SR, Rubin D, Follmann D, *et al*. Desirability of Outcome Ranking  
30  
31 599 (DOOR) and Response Adjusted for Duration of Antibiotic Risk (RADAR). *Clin*  
32  
33 600 *Infect Dis* 2015; 61(5):800-6.
- 34  
35 601 21 DiNubile MJ, Chow JW, Satishchandran V, *et al*. Acquisition of resistant  
36  
37 602 bowel flora during a double-blind randomized clinical trial of ertapenem versus  
38  
39 603 piperacillin-tazobactam therapy for intraabdominal infections. *Antimicrob Agents*  
40  
41 604 *Chemother* 2005; 49:3217-21.
- 42  
43 605 22 Falguera M, Ruiz-Gonzalez A, Schoenenberger JA, *et al*. Prospective,  
44  
45 606 randomised study to compare empirical treatment versus targeted treatment on  
46  
47 607 the basis of the urine antigen results in hospitalised patients with community-  
48  
49 608 acquired pneumonia. *Thorax* 2010; 65(2):101-106.
- 50  
51 609 23 Kim JW, Chung J, Choi SH, *et al*. Early use of imipenem/cilastatin and  
52  
53  
54  
55  
56  
57  
58  
59  
60

1  
2  
3 610 vancomycin followed by de-escalation versus conventional antimicrobials  
4  
5 611 without de-escalation for patients with hospital-acquired pneumonia in a  
6  
7 612 medical ICU: a randomized clinical trial. *Crit Care* 2012; 16(1):R28.

8  
9  
10 613 24 Leone M, Bechis C, Baumstarck K, *et al*; AZUREA Network Investigators.  
11  
12 614 De-escalation versus continuation of empirical antimicrobial treatment in severe  
13  
14 615 sepsis: a multicenter non-blinded randomized noninferiority trial. *Intensive Care*  
15  
16 616 *Med* 2014; 40(10):1399-408.

17  
18 617 25 Paul M, Dickstein Y, Raz-Pasteur A. Antibiotic de-escalation for bloodstream  
19  
20 618 infections and pneumonia: systematic review and meta-analysis. *Clin Microbiol*  
21  
22 619 *Infect* 2016. Ahead of print.

23  
24  
25 620 26 Weiss E, Zahar JR, Lesprit P, *et al*; De-escalation Study Group. Elaboration  
26  
27 621 of a consensual definition of de-escalation allowing a ranking of  $\beta$ -lactams. *Clin*  
28  
29 622 *Microbiol Infect* 2015; 21(7):649.e1-10.

30  
31  
32 623 27 Madaras-Kelly K, Jones M, Remington R, *et al*. Development of an antibiotic  
33  
34 624 spectrum score based on veterans affairs culture and susceptibility data for the  
35  
36 625 purpose of measuring antibiotic de-escalation: a modified Delphi approach.  
37  
38 626 *Infect Control Hosp Epidemiol* 2014; 35(9):1103-13.

39  
40 627 28 Mertz D, Koller M, Haller P, *et al*. Outcomes of early switching from  
41  
42 628 intravenous to oral antibiotics on medical wards. *J Antimicrob Chemother* 2009;  
43  
44 629 64(1):188-99.

45  
46  
47 630

48  
49 631

50  
51 632

52  
53 633

54  
55 634

1  
2  
3 635 Figure 1. SIMPLIFY – Decision tree of patient enrolment  
4

5 636 Figure 2. Schedule of visits and assessments. Except where otherwise  
6

7 637 specified, these refer to days from randomization.  
8

9  
10 638  
11  
12  
13  
14  
15  
16  
17  
18  
19  
20  
21  
22  
23  
24  
25  
26  
27  
28  
29  
30  
31  
32  
33  
34  
35  
36  
37  
38  
39  
40  
41  
42  
43  
44  
45  
46  
47  
48  
49  
50  
51  
52  
53  
54  
55  
56  
57  
58  
59  
60

For peer review only

1  
2  
3  
4  
5  
6  
7  
8  
9  
10  
11  
12  
13  
14  
15  
16  
17  
18  
19  
20  
21  
22  
23  
24  
25  
26  
27  
28  
29  
30  
31  
32  
33  
34  
35  
36  
37  
38  
39  
40  
41  
42  
43  
44  
45  
46  
47  
48  
49  
50  
51  
52  
53  
54  
55  
56  
57  
58  
59  
60

Figure 1.

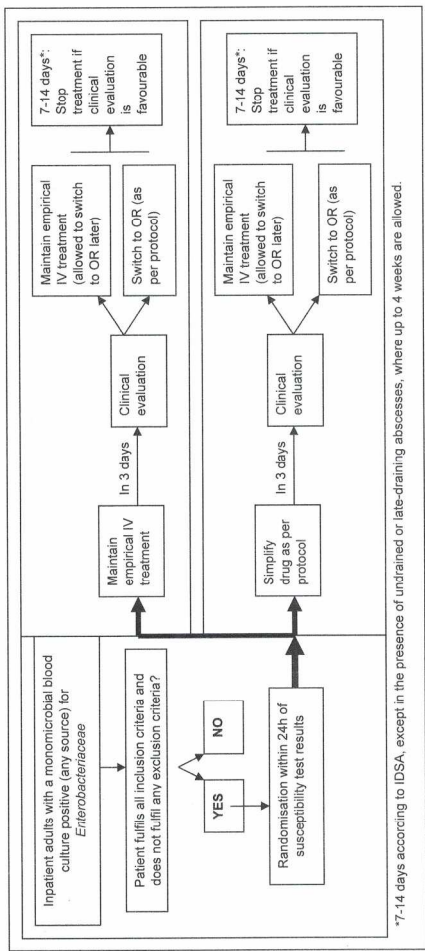

203x290mm (300 x 300 DPI)

1  
2  
3  
4  
5  
6  
7  
8  
9  
10  
11  
12  
13  
14  
15  
16  
17  
18  
19  
20  
21  
22  
23  
24  
25  
26  
27  
28  
29  
30  
31  
32  
33  
34  
35  
36  
37  
38  
39  
40  
41  
42  
43  
44  
45  
46  
47  
48  
49  
50  
51  
52  
53  
54  
55  
56  
57  
58  
59  
60

Figure 2.

| Procedures                        | Selecti on visit (Day 0) | Visit 1 (Day 1) | Visit 2 (Day 3-5) | End of treatment (Day 7-14) <sup>2,3</sup> | Test of cure (Day 12-21) <sup>1</sup> | Follow-up visit (Day 30±5) <sup>2</sup> | End of study (Day 60) <sup>2</sup> |
|-----------------------------------|--------------------------|-----------------|-------------------|--------------------------------------------|---------------------------------------|-----------------------------------------|------------------------------------|
| Randomization                     | X                        |                 |                   |                                            |                                       |                                         |                                    |
| Informed consent                  | X                        |                 |                   |                                            |                                       |                                         |                                    |
| Check in/exclusion criteria       | X                        |                 |                   |                                            |                                       |                                         |                                    |
| Pregnancy test                    | X                        |                 |                   |                                            |                                       |                                         |                                    |
| Demographic data/ medical history | X                        | X               | X                 | X                                          | X                                     | X                                       | X                                  |
| Physical examination              | X                        | X               | X                 | X <sup>2</sup>                             | X                                     | X <sup>2</sup>                          | X <sup>2</sup>                     |
| Laboratory data                   |                          | X               | X                 | X <sup>2</sup>                             | X                                     |                                         |                                    |
| Blood culture                     | X                        |                 | X                 | X <sup>3</sup>                             |                                       |                                         |                                    |
| Rectal swab <sup>4</sup>          | X                        |                 |                   | X                                          | X                                     | X                                       |                                    |
| Ancillary drugs                   | X                        | X               | X                 | X                                          |                                       | X                                       | X                                  |
| Drug dispensing control           | X                        | X               | X                 | X                                          |                                       |                                         |                                    |
| Adverse events                    |                          | X               | X                 | X                                          | X                                     | X                                       | X                                  |

(1) In the presence of an undrained abscess, TOC will be performed on day 28 or if drainage occurs after day 7 of treatment, TOC is to be done 7 days after that day; (2) This visit may be made by telephone if the patient has been discharged. In this scenario, no physical examination or lab tests are requested; (3) Only if previous blood cultures or symptoms remain positive; (4) Only in selected hospitals and face-to-face scheduled visits

203x290mm (300 x 300 DPI)

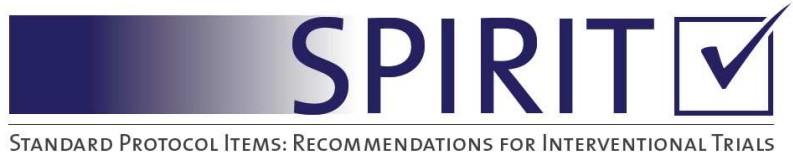

1  
2  
3  
4  
5  
6  
7  
8  
9  
10  
11  
12  
13  
14  
15  
16  
17  
18  
19  
20  
21  
22  
23  
24  
25  
26  
27  
28  
29  
30  
31  
32  
33  
34  
35  
36  
37  
38  
39  
40  
41  
42  
43  
44  
45  
46  
47  
48  
49

SPIRIT 2013 Checklist: Recommended items to address in a clinical trial protocol and related documents\*

| Section/item                      | Item No | Description                                                                                                                                                                                                                                                                              | Addressed on page number |
|-----------------------------------|---------|------------------------------------------------------------------------------------------------------------------------------------------------------------------------------------------------------------------------------------------------------------------------------------------|--------------------------|
| <b>Administrative information</b> |         |                                                                                                                                                                                                                                                                                          |                          |
| Title                             | 1       | Descriptive title identifying the study design, population, interventions, and, if applicable, trial acronym                                                                                                                                                                             | __Page 1__               |
| Trial registration                | 2a      | Trial identifier and registry name. If not yet registered, name of intended registry                                                                                                                                                                                                     | __Page 3__               |
|                                   | 2b      | All items from the World Health Organization Trial Registration Data Set                                                                                                                                                                                                                 | __Page 3__               |
| Protocol version                  | 3       | Date and version identifier                                                                                                                                                                                                                                                              | __Page 3__               |
| Funding                           | 4       | Sources and types of financial, material, and other support                                                                                                                                                                                                                              | __Page 24__              |
| Roles and responsibilities        | 5a      | Names, affiliations, and roles of protocol contributors                                                                                                                                                                                                                                  | __Page 1/25__            |
|                                   | 5b      | Name and contact information for the trial sponsor                                                                                                                                                                                                                                       | __Page 16__              |
|                                   | 5c      | Role of study sponsor and funders, if any, in study design; collection, management, analysis, and interpretation of data; writing of the report; and the decision to submit the report for publication, including whether they will have ultimate authority over any of these activities | __Page 24__              |
|                                   | 5d      | Composition, roles, and responsibilities of the coordinating centre, steering committee, endpoint adjudication committee, data management team, and other individuals or groups overseeing the trial, if applicable (see Item 21a for data monitoring committee)                         | __Page 25__              |

1  
2  
3 **Introduction**  
4

|                                                              |     |                                                                                                               |              |
|--------------------------------------------------------------|-----|---------------------------------------------------------------------------------------------------------------|--------------|
| 5 Background and                                             | 6a  | Description of research question and justification for undertaking the trial, including summary of relevant   | __Page 5 __  |
| 6 rationale                                                  |     | studies (published and unpublished) examining benefits and harms for each intervention                        |              |
| 7                                                            |     |                                                                                                               |              |
| 8                                                            | 6b  | Explanation for choice of comparators                                                                         | __Page 5 __  |
| 9                                                            |     |                                                                                                               |              |
| 10 Objectives                                                | 7   | Specific objectives or hypotheses                                                                             | __Page 6 __  |
| 11                                                           |     |                                                                                                               |              |
| 12 Trial design                                              | 8   | Description of trial design including type of trial (eg, parallel group, crossover, factorial, single group), | __Page 6 __  |
| 13                                                           |     | allocation ratio, and framework (eg, superiority, equivalence, noninferiority, exploratory)                   |              |
| 14                                                           |     |                                                                                                               |              |
| 15                                                           |     |                                                                                                               |              |
| 16 <b>Methods: Participants, interventions, and outcomes</b> |     |                                                                                                               |              |
| 17                                                           |     |                                                                                                               |              |
| 18 Study setting                                             | 9   | Description of study settings (eg, community clinic, academic hospital) and list of countries where data will | __Page 7 __  |
| 19                                                           |     | be collected. Reference to where list of study sites can be obtained                                          |              |
| 20                                                           |     |                                                                                                               |              |
| 21 Eligibility criteria                                      | 10  | Inclusion and exclusion criteria for participants. If applicable, eligibility criteria for study centres and  | __Page 7 __  |
| 22                                                           |     | individuals who will perform the interventions (eg, surgeons, psychotherapists)                               |              |
| 23                                                           |     |                                                                                                               |              |
| 24 Interventions                                             | 11a | Interventions for each group with sufficient detail to allow replication, including how and when they will be | __Page 9 __  |
| 25                                                           |     | administered                                                                                                  |              |
| 26                                                           |     |                                                                                                               |              |
| 27                                                           | 11b | Criteria for discontinuing or modifying allocated interventions for a given trial participant (eg, drug dose  | __Page 12 __ |
| 28                                                           |     | change in response to harms, participant request, or improving/worsening disease)                             |              |
| 29                                                           |     |                                                                                                               |              |
| 30                                                           | 11c | Strategies to improve adherence to intervention protocols, and any procedures for monitoring adherence        | __Page 9 __  |
| 31                                                           |     | (eg, drug tablet return, laboratory tests)                                                                    |              |
| 32                                                           |     |                                                                                                               |              |
| 33                                                           | 11d | Relevant concomitant care and interventions that are permitted or prohibited during the trial                 | __Page 10 __ |
| 34                                                           |     |                                                                                                               |              |
| 35 Outcomes                                                  | 12  | Primary, secondary, and other outcomes, including the specific measurement variable (eg, systolic blood       | __Page 13 __ |
| 36                                                           |     | pressure), analysis metric (eg, change from baseline, final value, time to event), method of aggregation (eg, |              |
| 37                                                           |     | median, proportion), and time point for each outcome. Explanation of the clinical relevance of chosen         |              |
| 38                                                           |     | efficacy and harm outcomes is strongly recommended                                                            |              |
| 39                                                           |     |                                                                                                               |              |
| 40                                                           |     |                                                                                                               |              |
| 41 Participant timeline                                      | 13  | Time schedule of enrolment, interventions (including any run-ins and washouts), assessments, and visits for   | __Page 14 __ |
| 42                                                           |     | participants. A schematic diagram is highly recommended (see Figure)                                          |              |
| 43                                                           |     |                                                                                                               |              |
| 44                                                           |     |                                                                                                               |              |
| 45                                                           |     |                                                                                                               |              |
| 46                                                           |     |                                                                                                               |              |
| 47                                                           |     |                                                                                                               |              |
| 48                                                           |     |                                                                                                               |              |
| 49                                                           |     |                                                                                                               |              |



1  
2  
3 Sample size 14 Estimated number of participants needed to achieve study objectives and how it was determined, including \_\_Page 19 \_\_  
4 clinical and statistical assumptions supporting any sample size calculations

5  
6 Recruitment 15 Strategies for achieving adequate participant enrolment to reach target sample size \_\_ N/A \_\_  
7

8 **Methods: Assignment of interventions (for controlled trials)**  
9

10 Allocation: \_\_Page 8 \_\_  
11

12 Sequence generation 16a Method of generating the allocation sequence (eg, computer-generated random numbers), and list of any \_\_Page 8 \_\_  
13 factors for stratification. To reduce predictability of a random sequence, details of any planned restriction  
14 (eg, blocking) should be provided in a separate document that is unavailable to those who enrol participants  
15 or assign interventions  
16

17 Allocation concealment mechanism 16b Mechanism of implementing the allocation sequence (eg, central telephone; sequentially numbered, \_\_Page 8 \_\_  
18 opaque, sealed envelopes), describing any steps to conceal the sequence until interventions are assigned  
19  
20

21 Implementation 16c Who will generate the allocation sequence, who will enrol participants, and who will assign participants to \_\_Page 8 \_\_  
22 interventions  
23

24 Blinding (masking) 17a Who will be blinded after assignment to interventions (eg, trial participants, care providers, outcome \_\_Page 8 \_\_  
25 assessors, data analysts), and how  
26

27  
28 17b If blinded, circumstances under which unblinding is permissible, and procedure for revealing a participant's \_\_Page 8 \_\_  
29 allocated intervention during the trial  
30  
31

32 **Methods: Data collection, management, and analysis**  
33

34 Data collection methods 18a Plans for assessment and collection of outcome, baseline, and other trial data, including any related \_\_Page 16 \_\_  
35 processes to promote data quality (eg, duplicate measurements, training of assessors) and a description of  
36 study instruments (eg, questionnaires, laboratory tests) along with their reliability and validity, if known.  
37 Reference to where data collection forms can be found, if not in the protocol  
38

39 18b Plans to promote participant retention and complete follow-up, including list of any outcome data to be \_\_Page 16 \_\_  
40 collected for participants who discontinue or deviate from intervention protocols  
41  
42  
43  
44  
45

|    |                     |     |                                                                                                                                                                                                                                                                   |                 |
|----|---------------------|-----|-------------------------------------------------------------------------------------------------------------------------------------------------------------------------------------------------------------------------------------------------------------------|-----------------|
| 1  |                     |     |                                                                                                                                                                                                                                                                   |                 |
| 2  |                     |     |                                                                                                                                                                                                                                                                   |                 |
| 3  | Data management     | 19  | Plans for data entry, coding, security, and storage, including any related processes to promote data quality (eg, double data entry; range checks for data values). Reference to where details of data management procedures can be found, if not in the protocol | __Page 16 __    |
| 4  |                     |     |                                                                                                                                                                                                                                                                   |                 |
| 5  |                     |     |                                                                                                                                                                                                                                                                   |                 |
| 6  |                     |     |                                                                                                                                                                                                                                                                   |                 |
| 7  | Statistical methods | 20a | Statistical methods for analysing primary and secondary outcomes. Reference to where other details of the statistical analysis plan can be found, if not in the protocol                                                                                          | __Page 14/19 __ |
| 8  |                     |     |                                                                                                                                                                                                                                                                   |                 |
| 9  |                     |     |                                                                                                                                                                                                                                                                   |                 |
| 10 |                     | 20b | Methods for any additional analyses (eg, subgroup and adjusted analyses)                                                                                                                                                                                          | __Page 14/19 __ |
| 11 |                     |     |                                                                                                                                                                                                                                                                   |                 |
| 12 |                     | 20c | Definition of analysis population relating to protocol non-adherence (eg, as randomised analysis), and any statistical methods to handle missing data (eg, multiple imputation)                                                                                   | __Page 14/19 __ |
| 13 |                     |     |                                                                                                                                                                                                                                                                   |                 |
| 14 |                     |     |                                                                                                                                                                                                                                                                   |                 |
| 15 |                     |     |                                                                                                                                                                                                                                                                   |                 |

### 16 **Methods: Monitoring**

|    |                 |     |                                                                                                                                                                                                                                                                                                                                       |              |
|----|-----------------|-----|---------------------------------------------------------------------------------------------------------------------------------------------------------------------------------------------------------------------------------------------------------------------------------------------------------------------------------------|--------------|
| 17 |                 |     |                                                                                                                                                                                                                                                                                                                                       |              |
| 18 | Data monitoring | 21a | Composition of data monitoring committee (DMC); summary of its role and reporting structure; statement of whether it is independent from the sponsor and competing interests; and reference to where further details about its charter can be found, if not in the protocol. Alternatively, an explanation of why a DMC is not needed | __Page 16 __ |
| 19 |                 |     |                                                                                                                                                                                                                                                                                                                                       |              |
| 20 |                 |     |                                                                                                                                                                                                                                                                                                                                       |              |
| 21 |                 |     |                                                                                                                                                                                                                                                                                                                                       |              |
| 22 |                 |     |                                                                                                                                                                                                                                                                                                                                       |              |
| 23 |                 | 21b | Description of any interim analyses and stopping guidelines, including who will have access to these interim results and make the final decision to terminate the trial                                                                                                                                                               | __Page 17 __ |
| 24 |                 |     |                                                                                                                                                                                                                                                                                                                                       |              |
| 25 |                 |     |                                                                                                                                                                                                                                                                                                                                       |              |
| 26 | Harms           | 22  | Plans for collecting, assessing, reporting, and managing solicited and spontaneously reported adverse events and other unintended effects of trial interventions or trial conduct                                                                                                                                                     | __Page 19 __ |
| 27 |                 |     |                                                                                                                                                                                                                                                                                                                                       |              |
| 28 |                 |     |                                                                                                                                                                                                                                                                                                                                       |              |
| 29 | Auditing        | 23  | Frequency and procedures for auditing trial conduct, if any, and whether the process will be independent from investigators and the sponsor                                                                                                                                                                                           | __Page 17 __ |
| 30 |                 |     |                                                                                                                                                                                                                                                                                                                                       |              |
| 31 |                 |     |                                                                                                                                                                                                                                                                                                                                       |              |
| 32 |                 |     |                                                                                                                                                                                                                                                                                                                                       |              |

### 33 **Ethics and dissemination**

|    |                          |    |                                                                                                                                                                                                                                  |              |
|----|--------------------------|----|----------------------------------------------------------------------------------------------------------------------------------------------------------------------------------------------------------------------------------|--------------|
| 34 |                          |    |                                                                                                                                                                                                                                  |              |
| 35 | Research ethics approval | 24 | Plans for seeking research ethics committee/institutional review board (REC/IRB) approval                                                                                                                                        | __Page 20 __ |
| 36 |                          |    |                                                                                                                                                                                                                                  |              |
| 37 |                          |    |                                                                                                                                                                                                                                  |              |
| 38 | Protocol amendments      | 25 | Plans for communicating important protocol modifications (eg, changes to eligibility criteria, outcomes, analyses) to relevant parties (eg, investigators, REC/IRBs, trial participants, trial registries, journals, regulators) | __Page 16 __ |
| 39 |                          |    |                                                                                                                                                                                                                                  |              |
| 40 |                          |    |                                                                                                                                                                                                                                  |              |
| 41 |                          |    |                                                                                                                                                                                                                                  |              |
| 42 |                          |    |                                                                                                                                                                                                                                  |              |
| 43 |                          |    |                                                                                                                                                                                                                                  |              |
| 44 |                          |    |                                                                                                                                                                                                                                  |              |
| 45 |                          |    |                                                                                                                                                                                                                                  |              |

|    |                               |     |                                                                                                                                                                                                                                                                                     |             |
|----|-------------------------------|-----|-------------------------------------------------------------------------------------------------------------------------------------------------------------------------------------------------------------------------------------------------------------------------------------|-------------|
| 1  |                               |     |                                                                                                                                                                                                                                                                                     |             |
| 2  |                               |     |                                                                                                                                                                                                                                                                                     |             |
| 3  | Consent or assent             | 26a | Who will obtain informed consent or assent from potential trial participants or authorised surrogates, and how (see Item 32)                                                                                                                                                        | __Page 20__ |
| 4  |                               |     |                                                                                                                                                                                                                                                                                     |             |
| 5  |                               |     |                                                                                                                                                                                                                                                                                     |             |
| 6  |                               | 26b | Additional consent provisions for collection and use of participant data and biological specimens in ancillary studies, if applicable                                                                                                                                               | __Page 20__ |
| 7  |                               |     |                                                                                                                                                                                                                                                                                     |             |
| 8  |                               |     |                                                                                                                                                                                                                                                                                     |             |
| 9  | Confidentiality               | 27  | How personal information about potential and enrolled participants will be collected, shared, and maintained in order to protect confidentiality before, during, and after the trial                                                                                                | __Page 20__ |
| 10 |                               |     |                                                                                                                                                                                                                                                                                     |             |
| 11 |                               |     |                                                                                                                                                                                                                                                                                     |             |
| 12 | Declaration of interests      | 28  | Financial and other competing interests for principal investigators for the overall trial and each study site                                                                                                                                                                       | __Page 25__ |
| 13 |                               |     |                                                                                                                                                                                                                                                                                     |             |
| 14 |                               |     |                                                                                                                                                                                                                                                                                     |             |
| 15 | Access to data                | 29  | Statement of who will have access to the final trial dataset, and disclosure of contractual agreements that limit such access for investigators                                                                                                                                     | __Page 25__ |
| 16 |                               |     |                                                                                                                                                                                                                                                                                     |             |
| 17 |                               |     |                                                                                                                                                                                                                                                                                     |             |
| 18 | Ancillary and post-trial care | 30  | Provisions, if any, for ancillary and post-trial care, and for compensation to those who suffer harm from trial participation                                                                                                                                                       | __Page 19__ |
| 19 |                               |     |                                                                                                                                                                                                                                                                                     |             |
| 20 |                               |     |                                                                                                                                                                                                                                                                                     |             |
| 21 | Dissemination policy          | 31a | Plans for investigators and sponsor to communicate trial results to participants, healthcare professionals, the public, and other relevant groups (eg, via publication, reporting in results databases, or other data sharing arrangements), including any publication restrictions | __Page 3__  |
| 22 |                               |     |                                                                                                                                                                                                                                                                                     |             |
| 23 |                               |     |                                                                                                                                                                                                                                                                                     |             |
| 24 |                               |     |                                                                                                                                                                                                                                                                                     |             |
| 25 |                               |     |                                                                                                                                                                                                                                                                                     |             |
| 26 |                               | 31b | Authorship eligibility guidelines and any intended use of professional writers                                                                                                                                                                                                      | __N/A__     |
| 27 |                               |     |                                                                                                                                                                                                                                                                                     |             |
| 28 |                               | 31c | Plans, if any, for granting public access to the full protocol, participant-level dataset, and statistical code                                                                                                                                                                     | __Page 20__ |
| 29 |                               |     |                                                                                                                                                                                                                                                                                     |             |
| 30 | <b>Appendices</b>             |     |                                                                                                                                                                                                                                                                                     |             |
| 31 |                               |     |                                                                                                                                                                                                                                                                                     |             |
| 32 | Informed consent materials    | 32  | Model consent form and other related documentation given to participants and authorised surrogates                                                                                                                                                                                  | __N/A__     |
| 33 |                               |     |                                                                                                                                                                                                                                                                                     |             |
| 34 |                               |     |                                                                                                                                                                                                                                                                                     |             |
| 35 | Biological specimens          | 33  | Plans for collection, laboratory evaluation, and storage of biological specimens for genetic or molecular analysis in the current trial and for future use in ancillary studies, if applicable                                                                                      | __N/A__     |
| 36 |                               |     |                                                                                                                                                                                                                                                                                     |             |
| 37 |                               |     |                                                                                                                                                                                                                                                                                     |             |

38 \*It is strongly recommended that this checklist be read in conjunction with the SPIRIT 2013 Explanation & Elaboration for important clarification on the items.  
 39 Amendments to the protocol should be tracked and dated. The SPIRIT checklist is copyrighted by the SPIRIT Group under the Creative Commons  
 40 "[Attribution-NonCommercial-NoDerivs 3.0 Unported](https://creativecommons.org/licenses/by-nc-nd/3.0/)" license.  
 41

# BMJ Open

## Targeted simplification versus antipseudomonal broad-spectrum beta-lactams in patients with bloodstream infections due to Enterobacteriaceae (SIMPLIFY): a study protocol for a multicenter, open-label, phase III randomized, controlled, non-inferiority clinical trial

|                                 |                                                                                                                                                                                                                                                                                                                                                                                                                                                                                                                                                                                                                                                                                                                                                                                                                                                                                                                                                                                                                                                                                                                                                                                                                                                                                                                                                   |
|---------------------------------|---------------------------------------------------------------------------------------------------------------------------------------------------------------------------------------------------------------------------------------------------------------------------------------------------------------------------------------------------------------------------------------------------------------------------------------------------------------------------------------------------------------------------------------------------------------------------------------------------------------------------------------------------------------------------------------------------------------------------------------------------------------------------------------------------------------------------------------------------------------------------------------------------------------------------------------------------------------------------------------------------------------------------------------------------------------------------------------------------------------------------------------------------------------------------------------------------------------------------------------------------------------------------------------------------------------------------------------------------|
| Journal:                        | <i>BMJ Open</i>                                                                                                                                                                                                                                                                                                                                                                                                                                                                                                                                                                                                                                                                                                                                                                                                                                                                                                                                                                                                                                                                                                                                                                                                                                                                                                                                   |
| Manuscript ID                   | bmjopen-2016-015439.R2                                                                                                                                                                                                                                                                                                                                                                                                                                                                                                                                                                                                                                                                                                                                                                                                                                                                                                                                                                                                                                                                                                                                                                                                                                                                                                                            |
| Article Type:                   | Protocol                                                                                                                                                                                                                                                                                                                                                                                                                                                                                                                                                                                                                                                                                                                                                                                                                                                                                                                                                                                                                                                                                                                                                                                                                                                                                                                                          |
| Date Submitted by the Author:   | 04-Apr-2017                                                                                                                                                                                                                                                                                                                                                                                                                                                                                                                                                                                                                                                                                                                                                                                                                                                                                                                                                                                                                                                                                                                                                                                                                                                                                                                                       |
| Complete List of Authors:       | López-Cortés, Luis Eduardo; Hospital Universitario Virgen Macarena, Enfermedades Infecciosas y Microbiología Clínica<br>Rosso-Fernández, Clara; Hospital Universitario Virgen del Rocío, Unidad de Ensayos clínicos; Hospital Universitario Virgen del Rocío, Farmacología Clínica<br>Núñez-Núñez, María; Instituto de Biomedicina de Sevilla (IBiS)/Hospital Universitario Virgen Macarena /CSIC/Universidad de Sevilla. Sevilla, Spain., Unidad Clínica de Enfermedades Infecciosas, Microbiología y Medicina Preventiva; Hospital Universitario Virgen Macarena, Unidad Clínica de Farmacia<br>Lavín-Alconero, Lucía; Hospital Universitario Virgen del Rocío, Unidad de ensayos clínicos<br>Bravo-Ferrer, José; Hospitales Universitarios Virgen Macarena y Virgen del Rocío, Unidad de Gestión Clínica de Enfermedades Infecciosas, Microbiología y Medicina Preventiva<br>Barriga, Ángel; Hospital Universitario Virgen del Rocío, Unidad de ensayos clínicos<br>Delgado, Mercedes; Hospital Universitario Virgen Macarena, Microbiología Clínica<br>Lupián, Carmen; Hospital Universitario Virgen Macarena, Enfermedades Infecciosas y Microbiología Clínica<br>Retamar, Pilar; Hospital Universitario Virgen Macarena, Enfermedades Infecciosas y Microbiología Clínica<br>Rodríguez-Baño, Jesús; Hospital Universitario Virgen Macarena, |
| <b>Primary Subject Heading</b>: | Infectious diseases                                                                                                                                                                                                                                                                                                                                                                                                                                                                                                                                                                                                                                                                                                                                                                                                                                                                                                                                                                                                                                                                                                                                                                                                                                                                                                                               |
| Secondary Subject Heading:      | Medical management                                                                                                                                                                                                                                                                                                                                                                                                                                                                                                                                                                                                                                                                                                                                                                                                                                                                                                                                                                                                                                                                                                                                                                                                                                                                                                                                |
| Keywords:                       | De-escalation, Enterobacteriaceae, bloodstream infection, broad-spectrum antibiotics, antimicrobial stewardship                                                                                                                                                                                                                                                                                                                                                                                                                                                                                                                                                                                                                                                                                                                                                                                                                                                                                                                                                                                                                                                                                                                                                                                                                                   |
|                                 |                                                                                                                                                                                                                                                                                                                                                                                                                                                                                                                                                                                                                                                                                                                                                                                                                                                                                                                                                                                                                                                                                                                                                                                                                                                                                                                                                   |

1  
2  
3  
4  
5  
6  
7  
8  
9  
10  
11  
12  
13  
14  
15  
16  
17  
18  
19  
20  
21  
22  
23  
24  
25  
26  
27  
28  
29  
30  
31  
32  
33  
34  
35  
36  
37  
38  
39  
40  
41  
42  
43  
44  
45  
46  
47  
48  
49  
50  
51  
52  
53  
54  
55  
56  
57  
58  
59  
60

SCHOLARONE™  
Manuscripts

For peer review only

1  
2  
3 1 Title: Targeted simplification versus antipseudomonal broad-spectrum beta-  
4 lactams in patients with bloodstream infections due to *Enterobacteriaceae*  
5  
6 2 lactams in patients with bloodstream infections due to *Enterobacteriaceae*  
7  
8 3 (SIMPLIFY): a study protocol for a multicenter, open-label, phase III  
9  
10 4 randomized, controlled, non-inferiority clinical trial  
11  
12 5

## 6 **AUTHORS**

7 Luis Eduardo López-Cortés<sup>1</sup>, Clara Rosso-Fernández<sup>2,3</sup>, María Núñez-Núñez<sup>1,4</sup>,  
8 Lucía Lavín-Alconero<sup>2</sup>, José Bravo-Ferrer<sup>1</sup>, Ángel Barriga<sup>2</sup>, Mercedes Delgado<sup>1</sup>,  
9 Carmen Lupión<sup>1</sup>, Pilar Retamar<sup>1</sup>, Jesús Rodríguez-Baño<sup>1</sup>, and the SIMPLIFY  
10 Study Group\*.  
11

## 12 **Affiliations**

- 13 1. Unidad Clínica de Enfermedades Infecciosas y Microbiología Clínica ,  
14 Instituto de Biomedicina de Sevilla (IBiS)/Hospital Universitario Virgen  
15 Macarena /CSIC/Universidad de Sevilla. Sevilla, Spain.
- 16 2. Unidad de Investigación Clínica y Ensayos Clínicos (UICEC-HUVR),  
17 Hospitales Universitario Virgen del Rocío y Virgen Macarena, Sevilla,  
18 Spain.
- 19 3. Farmacología Clínica, Hospital Universitario Virgen del Rocío, Sevilla,  
20 Spain.
- 21 4. Unidad Clínica de Farmacia. Hospitales Universitarios Virgen Macarena,  
22 Sevilla, Spain.

23  
24 \* Members of the Simplify Study Group are listed in Acknowledgements.  
25

1  
2  
3 26 **Author for correspondence:** Luis Eduardo López Cortés  
4

5 27 **Email:** luiselopezcortes@gmail.com  
6  
7 28  
8  
9 29  
10

11 30 **ABSTRACT**

12 31 **Introduction:** Within the context of antimicrobial stewardship programs, de-  
13  
14 32 escalation of antimicrobial therapy is one of the proposed strategies for  
15  
16 33 reducing the unnecessary use of broad-spectrum antibiotics (BSA). The  
17  
18 34 empirical treatment of nosocomial and some health-care associated  
19  
20 35 bloodstream infections (BSI) frequently includes a beta-lactam with  
21  
22 36 antipseudomonal activity as monotherapy or in combination with other drugs, so  
23  
24 37 there is a great opportunity to optimize the empirical therapy based on  
25  
26 38 microbiological data. De-escalation is assumed as standard-of-care for experts  
27  
28 39 in infectious diseases; However, it is less frequent than it would be desirable.  
29  
30  
31

32 40 **Methods and analysis:** The SIMPLIFY trial is a multicenter, open-label, non-  
33  
34 41 inferiority phase III randomized controlled clinical trial, designed as a pragmatic  
35  
36 42 'real-practice' trial. The aim of this trial is to demonstrate the non-inferiority of  
37  
38 43 de-escalation from an empirical beta-lactam with antipseudomonal activity to a  
39  
40 44 targeted narrow-spectrum antimicrobial in patients with BSI due to  
41  
42 45 *Enterobacteriaceae*. The primary outcome is clinical cure, which will be  
43  
44 46 assessed at the test of cure visit. It will be conducted at 19 Spanish public and  
45  
46 47 university hospitals.  
47  
48

49 48 **Ethics and dissemination:** Each participating center has obtained the  
50  
51 49 approval of the Ethics Review Committee, the agreement of the Directors of the  
52  
53 50 Institutions, and authorization from the Spanish Regulatory Agency (AEMPS,  
54  
55  
56  
57  
58  
59  
60

1  
2  
3 51 Agencia Española del Medicamento y Productos Sanitarios). Data will be  
4  
5 52 presented at international conferences and published in peer-reviewed journals.  
6

7 53 **Discussion:** Strategies to reduce the use of BSA should be a priority. Most of  
8  
9 54 the studies that support de-escalation are observational, retrospective, and  
10  
11 55 heterogeneous. A recent Cochrane review stated that well-designed clinical  
12  
13 56 trials should be conducted to assess the safety and efficacy of de-escalation.  
14  
15

16  
17 57

## 18 58 **REGISTRATION**

19  
20 59 The European Union Clinical Trials Register: EudraCT number 2015-004219-  
21  
22 60 19.

23  
24 61 Clinical Trials.gov: NCT02795949

25  
26 62 Protocol version: V.2.0, dated 16 May 2016.  
27  
28  
29

30  
31 63

32 64 All items from the World Health Organization Trial Registration Data Set are  
33  
34 65 included in the registry.  
35  
36

37 66

## 38 67 **STRENGTHS OF THIS STUDY**

39  
40 68 • It will be the first trial on de-escalation specifically in patients with  
41  
42 69 bacteremia due to *Enterobacteriaceae*.

43  
44 70 • It will include patients independently of the source of bacteraemia or  
45  
46 71 severity of clinical presentation.  
47  
48

49 72 • A remote automatic randomisation system and external evaluation by  
50  
51 73 blinded investigators were used to avoid bias.  
52  
53

54 74 • It has been designed with daily clinical practice in mind.  
55  
56

57 75  
58  
59  
60



1  
2  
3 76 **LIMITATIONS OF THIS STUDY**  
4

- 5 77 • The open-label design is theoretically more prone to bias.  
6  
7 78 • Switching to oral therapy could potentially reduce the number of days in  
8  
9  
10 79 which patients are assigned to one or other arm.  
11  
12 80

13  
14 81 **KEYWORDS:**

15  
16 82 De-escalation, *Enterobacteriaceae*, bloodstream infection, broad-spectrum  
17  
18 83 antibiotics, antimicrobial stewardship.  
19

20  
21 84  
22  
23  
24  
25  
26  
27  
28  
29  
30  
31  
32  
33  
34  
35  
36  
37  
38  
39  
40  
41  
42  
43  
44  
45  
46  
47  
48  
49  
50  
51  
52  
53  
54  
55  
56  
57  
58  
59  
60

1  
2  
3 85 **BACKGROUND**  
4  
5 86

6  
7 87 The worldwide spread of antimicrobial resistance is recognised as a current  
8  
9 88 global public health threat. The implementation of stewardship programs for  
10  
11 89 optimizing antibiotic use has been shown both to improve antibiotic use and  
12  
13 90 also to help combat antimicrobial resistance [1]. Streamlining or de-escalation of  
14  
15 91 antimicrobial therapy is a strategy proposed to reduce the unnecessary use of  
16  
17 92 broad-spectrum antimicrobials (BSA) [1,2]. This can be carried out by changing  
18  
19 93 from combination therapy to monotherapy or by replacing the empirical  
20  
21 94 antibiotic with one with a narrower spectrum of activity, irrespective of the  
22  
23 95 microbiology results [1].  
24  
25  
26

27 96 Bloodstream infections (BSI) are known to be major causes of morbidity and  
28  
29 97 mortality. They represent suitable organisms for carrying out a de-escalation  
30  
31 98 strategy because they are very frequent, a high proportion of patients are  
32  
33 99 treated with BSA and the susceptibility of the causative organisms is known.  
34  
35

36 100 The *Enterobacteriaceae* as a group, is the most common cause of community-  
37  
38 101 and nosocomial BSI, with a crude associated mortality of around 15% [3]. The  
39  
40 102 empirical treatment for nosocomial and some healthcare-associated BSI  
41  
42 103 frequently includes a beta-lactam antibiotic with antipseudomonal activity in  
43  
44 104 monotherapy or in combination. This imposes strong selection pressure,  
45  
46 105 particularly on *Pseudomonas aeruginosa* isolates, and maybe selecting  
47  
48 106 multidrug resistant *Enterobacteriaceae* isolates. De-escalation according to  
49  
50 107 microbiological results is assumed as standard-of-care by most infectologists;  
51  
52 108 however, the reality is that de-escalation is much less frequent than is desirable  
53  
54 109 [4,5]. Some of the possible reasons for this phenomenon [6-8] include the fact  
55  
56  
57  
58  
59  
60

1  
2  
3 110 that the safety and efficacy of this treatment strategy are based only on a few  
4  
5 111 observational studies [9,10] and expert recommendations [11,12]. This was  
6  
7 112 supported by a recent Cochrane review [13] conducted among adults with  
8  
9 113 sepsis, severe sepsis or septic shock, whose authors concluded that there is no  
10  
11 114 adequate direct evidence that de-escalation of antimicrobial agents is effective  
12  
13 115 and safe in this scenario. Randomized clinical trials of their safety and efficacy  
14  
15 116 are needed, in order to establish “proof of concept” and help make clinical  
16  
17 117 decisions.  
18  
19  
20

21 118

## 22 119 **METHODS/DESIGN**

23 120

### 24 121 **Study hypothesis**

25 122 The aim of the trial is to demonstrate that de-escalation from empirical therapy  
26  
27 123 with an antipseudomonal beta-lactam to a targeted therapy is as effective and  
28  
29 124 safe in patients with BSI due to *Enterobacteriaceae* as continuing with the  
30  
31 125 empirical regimen.  
32  
33  
34  
35  
36  
37

38 126

### 39 127 **Design**

40  
41 128 The SIMPLIFY trial is a multicenter, open-label, phase III randomized  
42  
43 129 controlled clinical trial, powered to demonstrate the non-inferiority of de-  
44  
45 130 escalation with respect to continuing with the antipseudomonal agent and  
46  
47 131 designed as a real-world pragmatic trial. It was developed in accordance with  
48  
49 132 an extension of the SPIRIT statement for reporting non-inferiority, superiority  
50  
51 133 and equivalence trials [14,15].  
52  
53  
54  
55

56 134  
57  
58  
59  
60

1  
2  
3 135 **Participants and settings**  
4

5 136 The trial will be conducted at 19 public and tertiary Spanish hospitals with the  
6  
7 137 support of the Spanish Network for Research in Infectious Diseases  
8  
9 138 (REIPI) and the Spanish Clinical Research Network (SCReN). Thirteen of  
10  
11 139 them are University hospitals. Patients will be evaluated for eligibility  
12  
13 140 once *Enterobacteriaceae* is isolated from blood cultures and  
14  
15 141 susceptibility data are available. Detection of eligible patients will be by  
16  
17 142 daily review of blood culture results by Infectious Disease specialists  
18  
19 143 from the bacteremia team at each center. To be enrolled, participants will  
20  
21 144 need to fulfill all inclusion and exclusion criteria (Table 1) plus give  
22  
23 145 written informed consent (the patient or a legally authorized  
24  
25 146 representative).  
26  
27  
28  
29  
30  
31

32 148 **Table 1. Inclusion and exclusion criteria**  
33

34 **Inclusion criteria**

- 35  
36 1. Written informed consent has been obtained from the patient or the  
37  
38 legally authorised representative.  
39  
40 2. Age  $\geq$  18 years, not legally incapacitated.  
41  
42 3. Hospitalised patients with monomicrobial bacteremia due to  
43  
44 *Enterobacteriaceae* from any source.  
45  
46 4. The patient has received active empiric antibiotic therapy with an  
47  
48 antipseudomonal beta-lactam (imipenem, meropenem, piperacillin-  
49  
50 tazobactam, cefepime, ceftazidime, aztreonam), alone or in combination  
51  
52 with another antimicrobial agent, which started in the first 24 hours after  
53  
54 the first positive blood culture was taken.  
55  
56  
57  
58  
59  
60

5. The isolate is susceptible to at least one of antibiotics included in the experimental arm.
6. Intravenous antimicrobial treatment is planned for at least 5 days once *Enterobacteriaceae* is isolated from the blood culture.

**Exclusion criteria**

1. Life expectancy <30 days.
2. Pregnancy or nursing. For included women: failure to use a highly effective contraceptive method.
3. Isolation of carbapenemase-producing *Enterobacteriaceae* (because most hospitals do not use monotherapy in these cases).
4. Inclusion is delayed >48 h after susceptibility data of the isolate are available.
5. Severe neutropenia (<500 cells/mm<sup>3</sup>) on the day of randomization.
6. Planned duration of treatment >28 days (e.g. osteomyelitis, endocarditis).

149

150

**151 Randomization**

152 Stratified randomization in a 1:1 ratio will be achieved using a centralized, web-  
153 based automated randomization system integrated with the eCRF (electronic  
154 Case Report Form) to manage assignment to the treatment arms. A copy of the  
155 randomization list will be kept in a safe place in case technical problems arise.  
156 The only criterion for stratification will be source of bloodstream infection  
157 (urinary tract vs any other) in order to ensure that the percentage of patients  
158 with urinary tract infections is similar in the two groups being compared. To

1  
2  
3 159 guarantee an appropriate allocation concealment in an open trial, randomization  
4  
5 160 will not be stratified by site.  
6

7 161

8  
9 162 **Intervention**

10  
11 163 A decision tree of enrolment to the study is included in Figure 1. As stated  
12  
13 164 above, all included patients will already be receiving an antipseudomonal beta-  
14  
15 165 lactam (meropenem, imipenem, piperacillin-tazobactam, cefepime, ceftazidime  
16  
17 166 or aztreonam) before randomization occurs. Patients will be allocated to one of  
18  
19 167 the following treatment arms:  
20  
21

22 168

23  
24  
25 169 Experimental group:

26  
27 170 The patient will change to an intravenous therapy with an active narrow-  
28  
29 171 spectrum antibiotic according to the susceptibility results (EUCAST or CLSI  
30  
31 172 criteria); the antibiotic will be chosen in the following order (the first active drug  
32  
33 173 will be used): (1) ampicillin, 2 g q6h; (2) trimethoprim/sulfamethoxazole,  
34  
35 174 160/800 mg q8-12h; (3) cefuroxime, 750-1500 mg q8h; (4) cefotaxime 1-2g q8h  
36  
37 175 or ceftriaxone, 1 g q12-24h; (5) amoxicillin/clavulanate, 1g/125 mg q8h; (6)  
38  
39 176 ciprofloxacin, 400 mg q12h; and (7) ertapenem, 1g q24h.  
40  
41 177 Trimethoprim/sulfamethoxazole will only be used in urinary tract infections in the  
42  
43 178 absence of an undrained renal abscess. Ciprofloxacin is included because,  
44  
45 179 apart from being active against *P. aeruginosa*, it is not a beta-lactam.  
46  
47

48 180

49  
50  
51 181 Control group:

52  
53 182 Continuation of the antipseudomonal beta-lactam that was being administered  
54  
55 183 on an empirical basis: meropenem, 1-2 g q8h; imipenem, 0.5-1g q6h;  
56  
57  
58  
59  
60

1  
2  
3 184 piperacillin-tazobactam, 4/0.5 g q6-8h; cefepime, 2 g q8-12h; ceftazidime, 1-2 g  
4  
5 185 q8h; and aztreonam, 1-2 g q8h.

6  
7 186

8  
9 187 Exceptions to the above rule:

10 188 Third-generation cephalosporins should be avoided where there are inducible

11 189 AmpC  $\beta$ -lactamase-producing *Enterobacteriaceae* (*Enterobacter* spp.,

12 190 *Providencia* spp., *Morganella morganii*, *Serratia marcescens*, and *Citrobacter*

13 191 *freundii*); hence, even if the isolates are strictly susceptible, for patients in the

14 192 control group, ceftazidime may be changed to any other antipseudomonal beta-

15 193 lactam on the day of randomization. For patients allocated to the experimental

16 194 arm, the options will be limited to trimethoprim/sulfamethoxazole, ciprofloxacin

17 195 or ertapenem.

18 196 ESBL producers could be included in the study based on attending physician's

19 197 criteria; in this cases, maximum doses of susceptible antibiotics are

20 198 recommended.

21 199

22 200 Dose adjustment

23 201 Due to the nature of the study design as a real-world clinical practice trial,

24 202 antimicrobial dosage will be as deemed by the treating clinician, dependent on

25 203 pharmacokinetic and pharmacodynamic (PK/PD) characteristics (such as higher

26 204 doses for septic shock or high body mass). Dose adjustment will be made for all

27 205 drugs as necessary in the case of renal or hepatic dysfunction, following

28 206 Summary of Product Characteristics (SmPC) recommendations.

29 207

30 208 Concomitant therapy

1  
2  
3 209 Even if the BSI is monomicrobial, the attending physician may consider the  
4  
5 210 infection to be polymicrobial at source. If additional anaerobic or gram-positive  
6  
7 211 coverage is needed, concomitant use of oral metronidazole, clindamycin,  
8  
9 212 vancomycin, teicoplanin, daptomycin or linezolid is allowed in both arms.  
10  
11 213 Concomitant treatment with any other systemic antibiotic with intrinsic activity  
12  
13 214 against gram-negative bacilli is not allowed. The administration of any of these  
14  
15 215 drugs while the patient is receiving the study drug will be deemed a criterion for  
16  
17 216 withdrawal. There are no absolute contraindications for the use of any other  
18  
19 217 drug during the study. However, contraindications, warnings and precautions for  
20  
21 218 use and possible interactions with study drugs are to be taken into account.  
22  
23  
24  
25

26 219

#### 27 220 Duration of therapy

28  
29 221 The appropriate duration of therapy is considered to be between 7 and 14 days,  
30  
31 222 according to the attending physician's criteria. Treatments lasting longer than  
32  
33 223 14 days will be allowed only when there is an undrained abscess present, in  
34  
35 224 which case, a 4-week treatment is permitted.  
36  
37  
38

39 225

#### 40 226 Route of administration

41  
42 227 Switching to oral therapy is allowed after the third day of therapy after  
43  
44 228 randomisation if all the following conditions are fulfilled: clinical improvement  
45  
46 229 has been achieved, absence of fever ( $>38^{\circ}\text{C}$ ), hemodynamic stability, adequate  
47  
48 230 control of the source of BSI and absence of secondary foci, adequate oral  
49  
50 231 intake, and no gastrointestinal conditions that might compromise drug  
51  
52 232 absorption.  
53  
54

55  
56 233 For patients in the experimental group, switching to oral therapy is allowed with  
57  
58  
59  
60



1  
2  
3 234 the same intravenous drugs as follows: trimethoprim/sulfamethoxazole 160/800  
4  
5 235 mg q8 -12h, cefuroxime axetil 500 mg q8-12h, amoxicillin/clavulanate 875/125  
6  
7 236 mg q8h, or ciprofloxacin 500 mg q12h. If the intravenous drug is ampicillin,  
8  
9 237 amoxicillin 1 g q8h will be used; if cefotaxime or ceftriaxone, then ceftibuten 400  
10  
11 238 mg q12-24h or cefixime 400 mg q12-24h will be used; if ertapenem, this drug  
12  
13 239 may be switched to the intramuscular route.

14  
15  
16 240 For patients in the control group, the preferred oral option is ciprofloxacin 500  
17  
18 241 mg q12h for all patients. The protocol allows treatment with cefuroxime-axetil  
19  
20 242 500 mg q8-12h or cefixime 400 mg q12-24h only in cases of resistance to  
21  
22 243 ciprofloxacin; finally, parenteral ertapenem 1g q24h may be used for  
23  
24 244 convenience if the isolate is resistant to all other oral options.

25  
26  
27 245

28  
29 246 Rescue medication

30  
31 247 No rescue medication is planned on behalf of the study if a patient has to  
32  
33 248 withdraw from the trial for any reason; the attending physician will follow clinical  
34  
35 249 guidelines for routine clinical practice and GCP (Good clinical practice) rules.

36  
37  
38 250

39  
40 251 Medication

41  
42 252 As all the study drugs are recommended for BSI caused by *Enterobacteriaceae*,  
43  
44 253 the sponsor will not provide the study drugs [16]. Every site participating in the  
45  
46 254 study is authorised to use the drugs through the normal provision of its hospital  
47  
48 255 pharmacy.

49  
50  
51 256

52  
53 257 **Schedule of visits**

54  
55  
56 258 Patients included in the study will be followed for 60 days ( $\pm$  5 days) after  
57  
58  
59  
60

1  
2  
3 259 diagnosis of the BSI (Figure 2). Follow-up will be organised in seven planned  
4  
5 260 visits at day 0 (baseline), day 1; day 3-5; day 7-14 (end of treatment); day 3-5  
6  
7 261 from end of treatment (test of cure, TOC); day 30 ± 5; and day 60 ± 5. Visits at  
8  
9 262 days 30 and 60 may be made by telephone.

10  
11 263 The visit schedule is planned so as to obtain data on clinical status, sample  
12  
13 264 collection, efficacy and safety variables, and adverse events. At the final  
14  
15 265 evaluation at 60 days, data on all outcome variables will be gathered.  
16  
17 266 Additionally, data will be collected at unplanned visits, with special  
18  
19 267 consideration given to the occurrence of any adverse event or recurrence.  
20  
21  
22

23 268

## 24 269 **Outcomes**

25  
26  
27 270 The primary outcome is clinical cure, which will be assessed at the TOC visit (3-  
28  
29 271 5 days after the end of antibiotic treatment). Death during treatment, change of  
30  
31 272 antibiotic therapy due to clinical failure, or need to prolong the treatment will be  
32  
33 273 considered as failures (Table 2). Secondary outcomes include early (5 days  
34  
35 274 after end of treatment) and late (60-day) clinical and microbiological response,  
36  
37 275 all-cause mortality (days 7, 14, and 30), length of hospital stay, recurrence rates  
38  
39 276 (relapse or reinfection) (day 60), safety of antibiotic treatment, including  
40  
41 277 *Clostridium difficile* infections and number of antibiotic treatments with an  
42  
43 278 antipseudomonal beta-lactam; in a subgroup of patients, the rate of intestinal  
44  
45 279 colonization by *P. aeruginosa* resistant to carbapenemase or piperacillin /  
46  
47 280 tazobactam, *Stenotrophomonas* spp., multiresistant *A. baumannii* and  
48  
49 281 enterobacteria producing ESBL, carbapenemase and chromosomal AmpC  
50  
51 282 (hyperproduction) or plasmid will be sought. Some of these secondary  
52  
53 283 outcomes will be analyzed as composite variables, following the DOOR/RADAR  
54  
55  
56  
57  
58  
59  
60

284 methodology. Outcome definitions, assessment, and time frames for  
 285 measurement are described in

286 **Table 2. Outcome definitions and time frames**

| Primary End Point and Time Frame                                                                                              | Definition and Assessment                                                                                                                                                                                                                                                                                                                                                                  |
|-------------------------------------------------------------------------------------------------------------------------------|--------------------------------------------------------------------------------------------------------------------------------------------------------------------------------------------------------------------------------------------------------------------------------------------------------------------------------------------------------------------------------------------|
| CLINICAL CURE<br><br>Day 3-5 after treatment*                                                                                 | TOC, the situation where all the following conditions are met:<br><br>survival at the time of the evaluation; complete resolution of all symptoms and signs of infection (or return to the situation prior to current infection); no need for prolonged antibiotic treatment beyond the recommended duration* and no need for treatment modification due to unfavorable clinical response. |
| *7-14 days according to IDSA, except in the presence of undrained or late-draining abscesses, when up to 4 weeks are allowed. |                                                                                                                                                                                                                                                                                                                                                                                            |
| Secondary End Point and Time Frame                                                                                            | Definition and Assessment                                                                                                                                                                                                                                                                                                                                                                  |
| CLINICAL RESPONSE<br><br>After 5 days of treatment (early response)                                                           | Same as clinical cure                                                                                                                                                                                                                                                                                                                                                                      |

|                                                                                                                 |                                                                                                                                                                                                                                                                      |
|-----------------------------------------------------------------------------------------------------------------|----------------------------------------------------------------------------------------------------------------------------------------------------------------------------------------------------------------------------------------------------------------------|
| Until Day 60 of follow-up (late response)                                                                       |                                                                                                                                                                                                                                                                      |
| MICROBIOLOGICAL CURE<br>After 5 days of treatment (early response)<br>Until Day 60 of follow-up (late response) | Negative blood cultures and where applicable, negative cultures from samples taken from initial infection focus.<br>'PRESUMPTIVE MICROBIOLOGIC CURE' is accepted in those cases where it is not possible to prove the negativization of isolates from initial focus. |
| ALL-CAUSE MORTALITY<br>7, 14 and 60-day of follow-up                                                            | Death for any reason                                                                                                                                                                                                                                                 |
| LENGTH OF HOSPITAL STAY                                                                                         | Time from randomisation to hospital discharge                                                                                                                                                                                                                        |
| CLINICAL RECURRENCE (RELAPSE OR REINFECTION) RATES<br>60-day of follow-up                                       | Recurrence of at least one clinical and one analytical sepsis criterion, with presence or absence of bacteraemia                                                                                                                                                     |
| MICROBIOLOGICAL RECURRENCE (RELAPSE OR REINFECTION) RATES<br>60-day of follow-up                                | New BSI episode with the same isolate as initial cultures with previously clinical and microbiological cure                                                                                                                                                          |

|                                                                          |                                                                                                                                                                                                                                     |
|--------------------------------------------------------------------------|-------------------------------------------------------------------------------------------------------------------------------------------------------------------------------------------------------------------------------------|
| <p>NUMBER OF DAYS OF APBL AVOIDED</p> <p>Until end of treatment</p>      | <p>Number of days of antibiotic treatment with an antipseudomonal beta-lactam (APBL) avoided</p>                                                                                                                                    |
| <p>ECOLOGICAL IMPACT</p> <p>7-14,12-21,30 days</p>                       | <p>Intestinal colonization by multidrug-resistant Gram-negative bacilli</p>                                                                                                                                                         |
| <p>SAFETY OF DRUGS - adverse events</p> <p>Until Day 60 of follow-up</p> | <p>Any untoward medical occurrence associated with the use of a drug in humans, whether or not considered drug-related.</p>                                                                                                         |
| <p>COMPOSITE SECONDARY VARIABLES</p> <p>7-14, 60-day follow up</p>       | <p>Survival on day 14, number of days with an antipseudomonal beta-lactam avoided, presence or absence of side effects, including <i>C. difficile</i> infections, secondary MDRO infections and all drug-related adverse events</p> |

287

288

### 289 **Data collection, management and monitoring**

290 The coordinating center for this study is the Hospital Universitario Virgen

291 Macarena, Seville, Spain, and the Clinical Trials Unit (CTU-Hospital

292 Universitario Virgen del Rocío) has delegated sponsor functions on behalf of

1  
2  
3 293 the Fundación Pública Andaluza para la Gestión de la Investigación en Salud  
4  
5 294 de Sevilla (FISEVI - <http://www.fisevi.com>). Clinical research associates (CRAs)  
6  
7 295 connected to the Spanish Clinical Research Network (SCReN) in public  
8  
9 296 hospitals will carry out monitoring activities. Data collection will be conducted by  
10  
11 297 trained staff at each participating center and entered into a restricted access  
12  
13 298 electronic case report form (eCRF). These forms will be available at the eCRF  
14  
15 299 web platform. Outstanding queries regarding the completion of the CRF will be  
16  
17  
18 300 sent to all participating centers as necessary to ensure accuracy of data.  
19

20  
21 301 In order to avoid any association with personal data, all study samples will be  
22  
23 302 anonymous and identifiable only by the patient's alphanumeric study code. The  
24  
25 303 objective and management of these samples are included in the patient's  
26  
27 304 information sheet and informed consent form.

28  
29 305 The quality of all data collected will be carefully supervised by the CTU and  
30  
31 306 specific visits for source data verification are organized according to the  
32  
33 307 monitoring plan. Furthermore, in order to minimize bias, at the interim analysis  
34  
35 308 (when 50% of the sample has been included), an independent committee (3  
36  
37 309 independent investigators from the REIPI) blinded to treatment assignment will  
38  
39 310 review all accumulated data. This committee will advise the sponsor on the  
40  
41 311 appropriateness of continuing the clinical trial as designed.  
42  
43  
44

45 312

### 46 313 **Isolates**

47  
48 314 All isolates will be sent to the central laboratory in the Hospital Universitario  
49  
50 315 Virgen Macarena in Seville for susceptibility testing using reference methods  
51  
52 316 and PCR characterisation and sequencing if necessary.  
53  
54

55 317 Eight selected hospitals will participate in the study of rectal carriage of ESBL-

1  
2  
3 318 AmpC- and carbapenemase-producing *Enterobacteriaceae*, by taking rectal  
4  
5 319 swabs from participants at different times (as set out in the schedule of visits).  
6  
7 320 To do this, samples will be taken by rectal swab from the patients of both  
8  
9 321 treatment arms on the day of randomization, the day when treatment finish, the  
10  
11 322 day of test of cure, and visit of day 30. The presence of *P. aeruginosa* resistant  
12  
13 323 to carbapenemase or piperacillin / tazobactam, *Stenotrophomonas* spp.,  
14  
15 324 multiresistant *A. baumannii* and enterobacteria producing ESBL,  
16  
17 325 carbapenemase and chromosomal AmpC (hyperproduction) or plasmid will be  
18  
19 326 sought. A written consent form for samples, approved by the ECs (Ethics  
20  
21 327 Committees), is also provided for the study.  
22  
23  
24  
25

328

### 329 **Definition of analysis population and outcome measures**

330 The following populations will be considered: the intention-to-treat population  
31  
32 331 (ITTP) includes all randomized patients; the modified ITTP (mITTP) includes  
33  
34 332 randomized patients who have received at least one dose of intravenous  
35  
36 333 antibiotics; the clinically evaluable population (CEP) includes patients who have  
37  
38 334 completed 5 days of the intravenous study drug, or who die but have received  
39  
40 335 at least one dose of intravenous antibiotics. The clinically and microbiologically  
41  
42 336 evaluable population (CMEP) includes those in the CEP who have had  
43  
44 337 microbiological tests (at least one blood culture 48 hours after randomization).  
45

46  
47 338 The local principal investigator in the centre where the patient was included will  
48  
49 339 assess the primary outcome (clinical cure) in the clinically evaluable population  
50  
51 340 (CEP) at TOC. Due to the intrinsic characteristics of the primary outcome (soft  
52  
53 341 outcome) and the study methodology (non-blinded), this evaluation done will be  
54  
55 342 reviewed later on the basis of clinical data recovered on two occasions by an  
56  
57  
58  
59  
60

1  
2  
3 343 external blinded investigator: firstly, during the interim analysis to monitor  
4  
5 344 safety; secondly before the complete cleaning and closure of the eCRF. For  
6  
7 345 secondary end points, the CMEP will be eligible for early (day 5) and late (day  
8  
9 346 60) microbiological responses, the m-ITTP for all-cause mortality and length of  
10  
11 347 hospital stay, and the CEP for the evaluation of recurrence rates and drug  
12  
13 348 safety.  
14

15  
16 349

### 17 18 350 **Sample size**

19  
20 351 The sample size was calculated using Epidat 4.0. Some of the data used to  
21  
22 352 calculate it was derived from the study published by Retamar *et al* [17].  
23  
24 353 Assuming estimated clinical cure rates of 85% in both groups, a non-inferiority  
25  
26 354 margin of 10% difference between the 2 groups, and treatment assignment in a  
27  
28 355 1:1 ratio, 344 patients in total (172 per study arm) are needed to achieve 80%  
29  
30 356 power with a significance level of 5%. This allows for a 5% dropout rate. The  
31  
32 357 10% non-inferiority margin was chosen as in recent trials of complicated urinary  
33  
34 358 tract and intraabdominal infections [18,19].  
35  
36 359

37  
38  
39 360

### 40 360 **Statistical analysis**

41  
42 361 Absolute differences will be calculated with 95% confidence intervals for the  
43  
44 362 clinical cure rate between the two arms of the study at TOC. Multivariate  
45  
46 363 analysis using logistic regression for the main outcome will be performed in  
47  
48 364 order to ensure the independence of the treatment effect. Special consideration  
49  
50 365 will be given in the multivariate analysis to the center of origin of the study  
51  
52 366 sample. A Cox regression analysis of mortality until 60 days will be performed  
53  
54 367 on the mITTP. For the superiority analysis, logistic regression will be used  
55  
56  
57  
58  
59  
60



1  
2  
3 368 sequentially, using the methodology recently published by Evans et al [20] for  
4  
5 369 the composite variable (DOOR and RADAR analysis using survival at day 14,  
6  
7 370 number of days of antipseudomonal beta-lactam treatment avoided, presence  
8  
9 371 or absence of side effects, including *C. difficile* infections, secondary MDRO  
10  
11 372 infections, and all drug-related adverse events). Antimicrobial doses are not  
12  
13 373 fixed and sensitivity analyses will therefore be applied to control potential bias.  
14  
15

16 374

### 17 18 375 **Protocol violations**

19  
20  
21 376 All protocol violations occurring after randomization will be listed in the Clinical  
22  
23 377 Study Report, tabulated by subject and by recruitment center.  
24

25 378

### 26 27 379 **ETHICS AND DISSEMINATION**

28  
29 380 Each of the participating centers has obtained the approval of an Ethics  
30  
31 381 Review Committee, the agreement of the Directors of the Institutions (who  
32  
33 382 signed the contract of agreement with the sponsor of the study) and  
34  
35 383 authorisation from the Spanish Regulatory Agency (AEMPS, Agencia Española  
36  
37 384 del Medicamento y Productos Sanitarios). All the patients have to sign the  
38  
39 385 informed consent previous to the randomization (Supplementary data). Patients  
40  
41 386 may withdraw from the study at any time without prejudice, as is documented  
42  
43 387 and explained at the time of providing consent. The study will be carried out  
44  
45 388 according to the principles of the Declaration of Helsinki, and Directive  
46  
47 389 2001/20/EC of the European Parliament and of the Council of 4 April 2001 on  
48  
49 390 the harmonization of the laws, regulations and administrative provisions of the  
50  
51 391 Member States relating to the implementation of Good Clinical Practice in the  
52  
53 392 conduct of clinical trials on medicinal products for human use until the  
54  
55  
56  
57  
58  
59  
60

1  
2  
3 393 new Clinical Trials Regulation (CTR) EU No 536/2014 becomes applicable,  
4  
5 394 which will be no earlier than 28 May 2016. The confidentiality of records that  
6  
7 395 might identify subjects in this study will be protected in accordance with EU  
8  
9 396 Directive 2001/20/EC. All laws for the control and protection of personal  
10  
11 397 information will be carefully followed. The identities of patients will not be  
12  
13 398 disclosed in the e-CRF; names will be replaced by an alphanumeric code and  
14  
15 399 any material related to the trial, such as samples, will be identified in the same  
16  
17 400 way, so that no personal information will be revealed.  
18  
19

20  
21 401 Regarding to the dissemination plan, three communications with preliminary  
22  
23 402 clinical data to national and international conferences (ASM/IDSA or ECCMID)  
24  
25 403 are proposed during the second year of the study. For the third year, a further  
26  
27 404 presentation will be given at a national conference, and two other presentations  
28  
29 405 at international conferences with final or advanced data. Once we obtain the  
30  
31 406 final results of the study, at least three publications are expected: one in a D1  
32  
33 407 journal and two in Q1 journals.  
34  
35

36 408

## 37 38 409 **DISCUSSION**

39  
40 410 The extensive use of BSA and the dramatic increase in infections due to  
41  
42 411 multidrug-resistant organisms are forcing the scientific community to look for  
43  
44 412 strategies to combat this situation. In the real world, the application of de-  
45  
46 413 escalation to serious infections is less frequent than is desirable. The  
47  
48 414 arguments against de-escalation include: (1) the MIC of some narrow-spectrum  
49  
50 415 drugs are closer to susceptibility breakpoints than carbapenems, for example,  
51  
52 416 and some physicians may therefore feel safer using the latter; (2)  
53  
54 417 subpopulations resistant to narrow-spectrum drugs may be selected and appear  
55  
56  
57  
58  
59  
60

1  
2  
3 418 after some days of empirical treatment, leading to treatment failure in case of  
4  
5 419 de-escalation; (3) in the case of polymicrobial infections, it is not uncommon for  
6  
7 420 only one of the pathogens to be isolated in blood cultures, so that simplification  
8  
9 421 of treatment may be less safe and effective than a broad-spectrum treatment;  
10  
11 422 (4) there is some doubt about the real effectiveness of certain drugs against  
12  
13 423 isolates producing specific mechanisms of resistance. Furthermore, although it  
14  
15 424 is assumed that BSA has a greater impact on the selection of multidrug-  
16  
17 425 resistant strains, some studies suggest that it may depend more on the duration  
18  
19 426 of the treatment than the spectrum [16]. While none of these arguments have  
20  
21 427 been proven, it is also true that there is no strong evidence for the safety of de-  
22  
23 428 escalation strategies in these scenarios.

24  
25  
26  
27 429 To the best of our knowledge, three randomized trials on de-escalation  
28  
29 430 strategies, none of them specifically focused on bacteremia, have been  
30  
31 431 published, which show significant differences from this study [21-23]. The one  
32  
33 432 published by Falguera *et al* [22] compared the efficacy of empirical versus  
34  
35 433 targeted treatment on the basis of urine antigen results in hospitalized patients  
36  
37 434 with community-acquired pneumonia. The article published by Kim *et al* [23]  
38  
39 435 evaluated the efficacy of early use of imipenem/cilastatin and vancomycin  
40  
41 436 followed by de-escalation versus conventional antimicrobials without de-  
42  
43 437 escalation for patients with hospital-acquired pneumonia in ICUs. The last one,  
44  
45 438 published recently by Leone *et al* [24], included a limited number (n=116) of  
46  
47 439 ICU-admitted patients with severe sepsis; Its primary outcome was duration of  
48  
49 440 ICU stay, and not effectiveness of both treatment strategies. In that study, de-  
50  
51 441 escalation followed the recommendations of guidelines, not a pre-specified  
52  
53 442 protocol based on the clinical impact of the antibiotics. There was no significant  
54  
55  
56  
57  
58  
59  
60

1  
2  
3 443 difference in mortality, although unexpectedly, patients in the experimental arm  
4  
5 444 had a higher rate of superinfections (27% vs 11%,  $P = 0.03$ ). These results  
6  
7 445 contrast with a recent systematic review and meta-analysis that included 25  
8  
9 446 studies with data on de-escalation based on culture results, which showed a  
10  
11 447 significant reduction in the relative risk of death (RR 0.44, 95% CI: 0.30–0.66;  
12  
13 448  $p < 0.0001$ ). It is important to note that many of the included studies in the meta-  
14  
15 449 analysis were observational, retrospective and had a high degree of  
16  
17 450 heterogeneity [25].

18  
19  
20 451 Several authors have warned about the considerable inconsistencies in  
21  
22 452 definitions of de-escalation. In 2015, Weiss *et al* [26] elaborated a consensual  
23  
24 453 definition of de-escalation that allowed beta-lactams to be ranked according to  
25  
26 454 both their spectra and their ecological impact. The authors underlined  
27  
28 455 the difficulty of reaching consensus on the relative ecological impact of each  
29  
30 456 individual drug. In 2014, Madaras-Kelly *et al.* [27] used the Delphi approach to  
31  
32 457 develop an antibiotic spectrum score to measure de-escalation. We shall  
33  
34 458 therefore include both concepts in our analysis, using Outcome Ranking  
35  
36 459 (DOOR) and Response Adjusted for Duration of Antibiotic Risk (RADAR)  
37  
38 460 analyses [20].

39  
40 461 Switching from intravenous to oral therapy as soon as the patient is clinically  
41  
42 462 stable can reduce the risk of adverse events related to intravenous therapy,  
43  
44 463 length of hospitalization, and cost. It can be applied regardless of the source of  
45  
46 464 infection and underlying conditions whenever a good option that achieves the  
47  
48 465 PK/PD targets is available [28]. In our study, switching to oral therapy is allowed  
49  
50 466 in both arms to avoid exposing patients in the control arm to unnecessary risks.  
51  
52  
53  
54  
55  
56  
57  
58  
59  
60

1  
2  
3 467 The SIMPLIFY trial has several strengths. In the first place, it will be the first trial  
4  
5 468 on de-escalation specifically in patients with bacteremia due to  
6  
7 469 *Enterobacteriaceae*. Second, it will include patients independently of the source  
8  
9 470 of bacteraemia or severity of clinical presentation. Third, it was designed with  
10  
11 471 daily clinical practice in mind. We hope that, if there is reasonable evidence to  
12  
13 472 reject the null hypothesis, it will encourage implementation of this type of  
14  
15 473 strategy in daily practice.  
16  
17  
18  
19

474

#### 475 **TRIAL STATUS**

- 476 • Funding for the study was approved on 15/08/2015 and available for  
477 study expenses in 01/01/2016.
- 478 • EC approval for the 19 sites included was obtained on 15th March 2016.
- 479 • Authorization from the Spanish Regulatory Authority was obtained on  
480 18th March 2016.
- 481 • The study has been approved for a recruitment period of 2 years.
- 482 • Dissemination of results directed to patients will be channeled through  
483 the Spanish Clinical Studies Registry (Agencia Española del  
484 Medicamento y Productos Sanitarios), whose content is adapted to  
485 patients.

486

#### 487 **SPONSOR INFORMATION**

488 Name: Fundación Pública Andaluza para la Gestión de la Investigación en  
489 Salud de Sevilla (FISEVI).

490 Contact: [claram.rosso.sspa@juntadeandalucia.es](mailto:claram.rosso.sspa@juntadeandalucia.es)

491

1  
2  
3 492 **FUNDING**

4  
5 493 This project is a non-commercial, investigator-driven clinical trial, funded  
6  
7 494 through public competitive call by the Instituto de Salud Carlos III (ISCIII),  
8  
9 495 document number: PI15/00439, funded by Instituto de Salud Carlos III,  
10  
11 496 integrated in the national I+D+i 2013-2016 and co-funded by European Union  
12  
13 497 (ERDF/ESF, "Investing in your future"). This study is supported by the Spanish  
14  
15 498 Clinical Research Network and funded by ISCII: study number 16.001.  
16  
17  
18  
19

20  
21 499

22 500 **ROLE OF THE STUDY SPONSOR/ FUNDING SOURCE**

23 501 The sponsor and funders of the study had no role in the study design or in  
24  
25 502 manuscript development.  
26

27 503

28  
29 504 **COMPETING INTERESTS ESTATEMENT**

30  
31 505 The authors have no competing interests to declare.  
32  
33

34 506

35  
36 507 **CONTRIBUTORSHIP STATEMENT**

37  
38 508 JR-B and LEL-C were responsible for formulating the overall research questions  
39  
40 509 and for the methodological design of the study. CR-F, BA and LL-A collaborated  
41  
42 510 in the submission of the project for the Spanish funding, and collaborated in the  
43  
44 511 methodological aspects of the study. JR-B is the coordinating investigator and  
45  
46 512 leader of the Coordination Team. CR-F is responsible for the CTU. MN-N  
47  
48 513 collaborated with writing of the manuscript and with the pharmacovigilance  
49  
50 514 design, and JB-F, PR-G, and CL collaborated in the organisation of the study.  
51  
52 515 MD contributed in all the microbiological details of the study. JR-B and LEL-C  
53  
54 516 participated in its design and supervised the project. All authors read and  
55  
56  
57  
58  
59  
60

1  
2  
3 517 approved the final manuscript.  
4

5 518  
6

7 519 **DATA SHARING STATEMENT**  
8

9 520 No additional unpublished data from the study are available  
10

11 521  
12

13  
14 522 **ACKNOWLEDGEMENTS:** P. Aguilar, I.J. de la Calle, and A. Romero (Hospital  
15

16 523 Universitario Puerto Real, Cádiz); E. Merino, V. Boix, L.Giner, J.C. Rodríguez  
17

18 524 and A. Gimeno (Hospital Universitario de Alicante); F. Guerrero-Sánchez, A.  
19

20 525 Martin-Aspas and F. Galán-Sánchez (Hospital Universitario Puerta del Mar,  
21

22 526 Cádiz); D. Diez, V. Pérez-Carral and M.I. Paz (Complejo Hospitalario  
23

24 527 Universitario de Ourense); C. Fariñas, C. Armiñanzas, C. González and C.  
25

26 528 Ruiz de Alegría-Puig (Hospital Universitario Marqués de Valdecilla, Santander);  
27

28 529 L. Gómez, E. Calbo and M. Xercavins-Valls (Hospital Universitario Mutua  
29

30 530 Terrassa, Terrassa); F. García-Colchero and M. Chávez (Hospital San Juan de  
31

32 531 Dios, Sevilla); J. Goikoetxea-Agirre, M. Montejo and L. López (Hospital  
33

34 532 Universitario de Cruces, Barakaldo); ; G. Bou and I. Torres (Hospital  
35

36 533 Universitario A Coruña); S. Pérez-Cortés and M.D. López-Prieto (Hospital  
37

38 534 Universitario de Jerez); B. Loeches and M. Romero (Hospital Universitario La  
39

40 535 Paz, Madrid); M. Ibarguren, M. A. Goenaga-Sánchez and J. M. García-  
41

42 536 Arenzana (Hospital Universitario Donostia); J. R. Yuste and J. Leiva-León  
43

44 537 (Clínica Universitaria de Navarra); A. Salas-Aparicio and C. de las Cuevas  
45

46 538 (Hospital Universitario La Princesa, Madrid); J.M. Guerra-Laso and I.  
47

48 539 Fernández-Natal (Complejo Asistencial Universitario de León); M. T. Pérez and  
49

50 540 F. Vasallo (Xerencia de Xestión Integrada de Vigo); G. Cuervo and C. Ardanuy  
51

52 541 (Hospital Universitario de Bellvitge); J.R. Paño and S. Salvo (Hospital Clínico  
53  
54  
55  
56  
57  
58  
59  
60

1  
2  
3 542 Universitario Lozano Blesa, Zaragoza); M. L. Martin-Pena and E. Ruiz de  
4  
5 543 Gospegui (Hospital Universitario Son Espases); M. del Barrio, S. Sadyrbaeva,  
6  
7 544 M. Coronel-Janeiro, M.P. Alarcón-González, and A. González-Herrero (Hospital  
8  
9 545 Universitario Virgen Macarena).  
10  
11  
12 546  
13  
14  
15  
16  
17  
18  
19  
20  
21  
22  
23  
24  
25  
26  
27  
28  
29  
30  
31  
32  
33  
34  
35  
36  
37  
38  
39  
40  
41  
42  
43  
44  
45  
46  
47  
48  
49  
50  
51  
52  
53  
54  
55  
56  
57  
58  
59  
60

For peer review only



547 **REFERENCES**

548

549 1 Rodríguez-Baño J, Paño-Pardo JR, Álvarez-Rocha L, *et al*. Programs for  
550 optimizing the use of antibiotics (PROA) in Spanish hospitals: GEIH-SEIMC,  
551 SEFH and SEMPSPH consensus document. *Enferm Infecc Microbiol Clin* 2012;  
552 30:22.e1-22.e23.

553 2 Dellit TH, Owens RC, McGowan JE Jr, *et al*; Infectious Diseases Society of  
554 America; Society for Healthcare Epidemiology of America. Infectious Diseases  
555 Society of America and the Society for Healthcare Epidemiology of America  
556 guidelines for developing an institutional program to enhance antimicrobial  
557 stewardship. *Clin Infect Dis* 2007; 44(2):159-77.

558 3 Rodríguez-Baño J, López-Prieto MD, Portillo MM, *et al*; SAEI/SAMPAC  
559 Bacteraemia Group. Epidemiology and clinical features of community-acquired,  
560 healthcare-associated and nosocomial bloodstream infections in tertiary-care  
561 and community hospitals. *Clin Microbiol Infect* 2010; 16(9):1408-13.

562 4 Paterson DL, Rice LB. Empirical antibiotic choice for the seriously ill patient:  
563 are minimization of selection of resistant organisms and maximization of  
564 individual outcome mutually exclusive? *Clin Infect Dis* 2003; 36(8):1006-12

565 5 Livermore DM. Has the era of untreatable infections arrived? *J Antimicrob*  
566 *Chemother* 2009; 64 Suppl 1:i29-36.

567 6 Khasawneh FA, Karim A, Mahmood T, *et al*. Antibiotic de-escalation in  
568 bacteremic urinary tract infections: potential opportunities and effect on  
569 outcome. *Infection*. 2014; 42(5):829-34.

570 7 Heenen S, Jacobs F, Vincent JL. Antibiotic strategies in severe nosocomial  
571 sepsis: why do we not de-escalate more often?. *Crit Care Med* 2012; 40:1404-

- 1  
2  
3 572 9.  
4  
5 573 8 Bal AM, Gould IM. Antibiotic stewardship: overcoming implementation  
6  
7 574 barriers. *Curr Opin Infect Dis* 2011; 24:357-62.  
8  
9 575 9 De Bus L, Denys W, Catteeuw J, *et al*. Impact of de-escalation of beta-lactam  
10  
11 576 antibiotics on the emergence of antibiotic resistance in ICU patients: a  
12  
13 577 retrospective observational study. *Intensive Care Med* 2016; 42(6):1029-39.  
14  
15  
16 578 10 Mokart D, Slehofer G, Lambert J, *et al*. De-escalation of antimicrobial  
17  
18 579 treatment in neutropenic patients with severe sepsis: results from an  
19  
20 580 observational study. *Intensive Care Med* 2014; 40(1):41-9.  
21  
22  
23 581 11 Kaye KS. Antimicrobial de-escalation strategies in hospitalized patients with  
24  
25 582 pneumonia, intra-abdominal infections, and bacteremia. *J Hosp Med* 2012;7  
26  
27 583 Suppl 1:S13-21.  
28  
29 584 12 Montravers P, Piednoir P, Allou N. De-escalation: in drug we trust. *Crit Care*  
30  
31 585 *Med* 2012 ; 40(5):1645-6.  
32  
33 586 13 Silva BN, Andriolo RB, Atallah AN, *et al*. De-escalation of antimicrobial  
34  
35 587 treatment for adults with sepsis, severe sepsis or septic shock. *Cochrane*  
36  
37 588 *Database Syst Rev* 2013; (3):CD007934.  
38  
39 589 14 Chan A-W, Tetzlaff JM, Altman DG, *et al* D. SPIRIT 2013 Statement:  
40  
41 590 Defining standard protocol items for clinical trials. *Ann Intern Med*  
42  
43 591 2013;158:200-207.  
44  
45 592 15 Chan A-W, Tetzlaff JM, Gøtzsche PC, *et al*. SPIRIT 2013 Explanation and  
46  
47 593 Elaboration: Guidance for protocols of clinical trials. *BMJ* 2013;346:e7586.16  
48  
49 594 Cisneros-Herreros JM, Cobo-Reinoso J, Pujol-Rojo M, *et al*. Guidelines for the  
50  
51 595 diagnosis and treatment of patients with bacteriemia. Guidelines of the  
52  
53 596 Sociedad Española de Enfermedades Infecciosas y Microbiología Clínica].  
54  
55  
56  
57  
58  
59  
60

- 1  
2  
3 597 *Enferm Infecc Microbiol Clin* 2007; 25(2):111-30.
- 4  
5 598 17 Retamar P, Portillo MM, López-Prieto MD, *et al*; SAEI/SAMPAC. Impact of  
6  
7 599 inadequate empirical therapy on the mortality of patients with bloodstream  
8  
9 600 infections: a propensity score-based analysis. *Antimicrob Agents Chemother*  
10  
11 601 2012; 56:472.
- 12  
13 602 18 Solomkin J, Hershberger E, Miller B, *et al*. Ceftolozane/tazobactam plus  
14  
15 603 metronidazole for complicated intra-abdominal infections in an era of multidrug  
16  
17 604 resistance: Results from a randomized, double-blind, phase 3 trial (ASPECT-  
18  
19 605 cIAI). *Clin Infect Dis* 2015; 60(10):1462-71.
- 20  
21 606 19 Wagenlehner FM, Sobel JD, Newell P, *et al*. Ceftazidime-avibactam versus  
22  
23 607 doripenem for the treatment of complicated urinary tract infections, including  
24  
25 608 acute pyelonephritis: RECAPTURE, a phase 3 randomized trial program. *Clin*  
26  
27 609 *Infect Dis* 2016; 63(6):754-62.
- 28  
29 610 20 Evans SR, Rubin D, Follmann D, *et al*. Desirability of Outcome Ranking  
30  
31 611 (DOOR) and Response Adjusted for Duration of Antibiotic Risk (RADAR). *Clin*  
32  
33 612 *Infect Dis* 2015; 61(5):800-6.
- 34  
35 613 21 DiNubile MJ, Chow JW, Satishchandran V, *et al*. Acquisition of resistant  
36  
37 614 bowel flora during a double-blind randomized clinical trial of ertapenem versus  
38  
39 615 piperacillin-tazobactam therapy for intraabdominal infections. *Antimicrob Agents*  
40  
41 616 *Chemother* 2005; 49:3217-21.
- 42  
43 617 22 Falguera M, Ruiz-Gonzalez A, Schoenenberger JA, *et al*. Prospective,  
44  
45 618 randomised study to compare empirical treatment versus targeted treatment on  
46  
47 619 the basis of the urine antigen results in hospitalised patients with community-  
48  
49 620 acquired pneumonia. *Thorax* 2010; 65(2):101-106.
- 50  
51 621 23 Kim JW, Chung J, Choi SH, *et al*. Early use of imipenem/cilastatin and  
52  
53  
54  
55  
56  
57  
58  
59  
60

1  
2  
3 622 vancomycin followed by de-escalation versus conventional antimicrobials  
4  
5 623 without de-escalation for patients with hospital-acquired pneumonia in a  
6  
7 624 medical ICU: a randomized clinical trial. *Crit Care* 2012; 16(1):R28.

8  
9  
10 625 24 Leone M, Bechis C, Baumstarck K, *et al*; AZUREA Network Investigators.  
11  
12 626 De-escalation versus continuation of empirical antimicrobial treatment in severe  
13  
14 627 sepsis: a multicenter non-blinded randomized noninferiority trial. *Intensive Care*  
15  
16 628 *Med* 2014; 40(10):1399-408.

17  
18 629 25 Paul M, Dickstein Y, Raz-Pasteur A. Antibiotic de-escalation for bloodstream  
19  
20 630 infections and pneumonia: systematic review and meta-analysis. *Clin Microbiol*  
21  
22 631 *Infect* 2016. Ahead of print.

23  
24  
25 632 26 Weiss E, Zahar JR, Lesprit P, *et al*; De-escalation Study Group. Elaboration  
26  
27 633 of a consensual definition of de-escalation allowing a ranking of  $\beta$ -lactams. *Clin*  
28  
29 634 *Microbiol Infect* 2015; 21(7):649.e1-10.

30  
31  
32 635 27 Madaras-Kelly K, Jones M, Remington R, *et al*. Development of an antibiotic  
33  
34 636 spectrum score based on veterans affairs culture and susceptibility data for the  
35  
36 637 purpose of measuring antibiotic de-escalation: a modified Delphi approach.  
37  
38 638 *Infect Control Hosp Epidemiol* 2014; 35(9):1103-13.

39  
40 639 28 Mertz D, Koller M, Haller P, *et al*. Outcomes of early switching from  
41  
42 640 intravenous to oral antibiotics on medical wards. *J Antimicrob Chemother* 2009;  
43  
44 641 64(1):188-99.

45  
46  
47 642

48  
49 643

50  
51 644

1  
2  
3  
4  
5  
6  
7  
8  
9  
10  
11  
12  
13  
14  
15  
16  
17  
18  
19  
20  
21  
22  
23  
24  
25  
26  
27  
28  
29  
30  
31  
32  
33  
34  
35  
36  
37  
38  
39  
40  
41  
42  
43  
44  
45  
46  
47  
48  
49  
50  
51  
52  
53  
54  
55  
56  
57  
58  
59  
60

645 Figure 1. SIMPLIFY – Decision tree of patient enrolment  
646 Figure 2. Schedule of visits and assessments. Except where otherwise  
647 specified, these refer to days from randomization.  
648

For peer review only

1  
2  
3  
4  
5  
6  
7  
8  
9  
10  
11  
12  
13  
14  
15  
16  
17  
18  
19  
20  
21  
22  
23  
24  
25  
26  
27  
28  
29  
30  
31  
32  
33  
34  
35  
36  
37  
38  
39  
40  
41  
42  
43  
44  
45  
46  
47  
48  
49  
50  
51  
52  
53  
54  
55  
56  
57  
58  
59  
60

Figure 1.

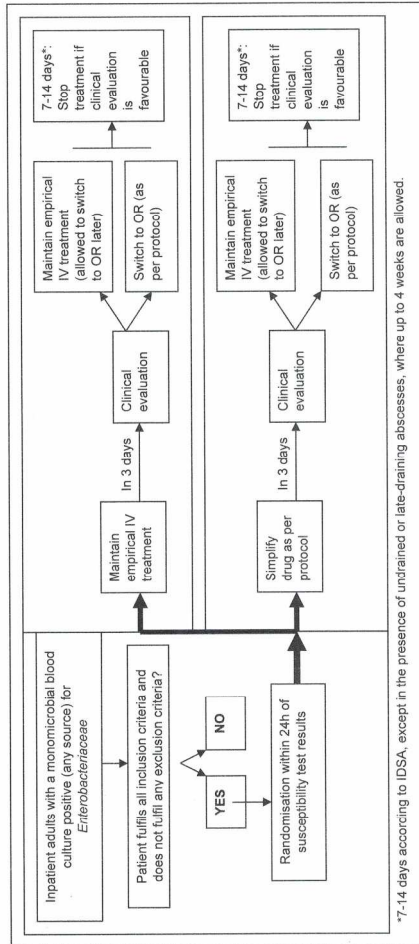

203x290mm (300 x 300 DPI)

Figure 2.

| Procedures                        | Selecti on visit (Day 0) | Visit 1 (Day 1) | Visit 2 (Day 3-5) | End of treatment (Day 7-14) <sup>2,3</sup> | Test of cure (Day 12-21) <sup>1</sup> | Follow-up visit (Day 30±5) <sup>2</sup> | End of study (Day 60) <sup>2</sup> |
|-----------------------------------|--------------------------|-----------------|-------------------|--------------------------------------------|---------------------------------------|-----------------------------------------|------------------------------------|
| Randomization                     | X                        |                 |                   |                                            |                                       |                                         |                                    |
| Informed consent                  | X                        |                 |                   |                                            |                                       |                                         |                                    |
| Check in/exclusion criteria       | X                        |                 |                   |                                            |                                       |                                         |                                    |
| Pregnancy test                    | X                        |                 |                   |                                            |                                       |                                         |                                    |
| Demographic data/ medical history | X                        | X               | X                 | X                                          | X                                     | X                                       | X                                  |
| Physical examination              | X                        | X               | X                 | X <sup>2</sup>                             | X                                     | X <sup>2</sup>                          | X <sup>2</sup>                     |
| Laboratory data                   |                          | X               | X                 | X <sup>2</sup>                             | X                                     |                                         |                                    |
| Blood culture                     | X                        |                 | X                 | X <sup>3</sup>                             |                                       |                                         |                                    |
| Rectal swab <sup>4</sup>          | X                        |                 |                   | X                                          | X                                     | X                                       |                                    |
| Ancillary drugs                   | X                        | X               | X                 | X                                          |                                       | X                                       | X                                  |
| Drug dispensing control           | X                        | X               | X                 | X                                          |                                       |                                         |                                    |
| Adverse events                    |                          | X               | X                 | X                                          | X                                     | X                                       | X                                  |

(1) In the presence of an undrained abscess, TOC will be performed on day 28 or if drainage occurs after day 7 of treatment, TOC is to be done 7 days after that day; (2) This visit may be made by telephone if the patient has been discharged. In this scenario, no physical examination or lab tests are requested; (3) Only if previous blood cultures or symptoms remain positive; (4) Only in selected hospitals and face-to-face scheduled visits

203x290mm (300 x 300 DPI)

**NAME OF THE STUDY:** Phase III randomized, multi-center, open-label, controlled clinical trial to demonstrate the non-inferiority of the narrow-spectrum directed antibiotic therapy versus a broad-spectrum antipseudomonal beta-lactam therapy in the treatment of patients with *Enterobacter* bacteremia.

**SPONSOR'S CODE:** SIMPLIFY

**SPONSOR:** Fundación Pública Andaluza para la Gestión de la Investigación en Salud de Sevilla (FISEVI), "*Andalusian Public Foundation for the Management of Clinical Research of Seville*".

## INTRODUCTION

Through this document we invite you to participate in a research study. The study has been approved by the Ethics Committee of Clinical Research of your hospital and the Spanish Agency of Pharmaceuticals and Health Products, according to the current legislation, Royal Decree 1090/2015, of December 4<sup>th</sup>, which regulates clinical trials with pharmaceuticals, the Ethics Committees of Research with Pharmaceuticals and the Spanish Registry of Clinical Trials.

## WHY DO WE ASK FOR YOUR PARTICIPATION?

You must know that your participation in this study is voluntary and that you can decide not to participate or change your decision and terminate your participation whenever you want to, with no questions asked, and without that altering the relationship between you and your GP or jeopardizing your treatment in any way.

## GENERAL DESCRIPTION OF THE STUDY

You have been diagnosed with bacteremia (an infection caused by a bacterium that reaches the bloodstream), which requires antibiotic treatment. The number of bacteria resistant to several antibiotics is increasing significantly. Thereby, there is a series of programs that aim to improve the way in which antibiotics are used, since that is directly related to the emergence of antibiotic resistances.

This study is absolutely not intended for testing the efficacy of new antibiotics.

## PURPOSE OF THE STUDY

The main goal of the study is to demonstrate that the use of an antibiotic treatment, selected according to microbiological data (of the bacterium), in patients with *Enterobacter* bacteremia, is safe and efficient enough to meet the first standard of broad-spectrum antibiotics (i.e., an antibiotic capable of curing infections by many types of bacteria). This would improve the use of antibiotics, since we would use specific antibiotics for the isolated bacterium.



1  
2  
3  
4 It is important to highlight that any of the treatment options you will receive if you  
5 participate in the study will be used in the standard-of-care, with a comparable efficacy  
6 in terms of experience gathered, although no other studies have done this before,  
7 which is why this trial was designed.  
8  
9

## 10 **WHAT DO WE OFFER YOU?**

11  
12  
13 This study is a clinical trial, which means that the treatment you will receive will be  
14 randomly selected by a computer; you will have the same probability to receive one of  
15 the two treatments (experimental or control) and we will compare the effects in both  
16 groups.  
17  
18

## 19 **WHAT DOES THE TREATMENT CONSIST OF?**

20  
21  
22 All the antibiotics included in the study are regularly used in patients with the same  
23 infection you suffer from. None of them is a new antibiotic and they will be used for the  
24 indications approved. You may receive one of the following treatment groups:  
25  
26

27 - **Experimental group:** following the criteria of your physician and according to the  
28 evolution of the disease, you may receive one of these antibiotics intravenously at the  
29 usual doses: ampicillin, trimethoprim/sulfamethoxazol, cefuroxime, cefotaxime,  
30 amoxicillin/clavulanic, ciprofloxacin, ertapenem.  
31  
32

33 It does not mean you will receive all of them, but you will be administered one of them  
34 in that order until your infection has been controlled.  
35  
36

37 - **Control group:** in this case you will continue to be administered the same antibiotic  
38 you are currently receiving (only one of them) at the usual dose:  
39 piperacillin/tazobactam, meropenem, imipenem, aztreonam, ceftazidime, cefepime.  
40  
41

42 In both cases, if your GP estimates that you suffer from a polymicrobial infection  
43 (caused by several bacteria), the previous antibiotic could be combined with one of the  
44 following: vancomycin, teicoplanin, daptomycin, linezolid, clindamycin or  
45 metronidazole.  
46  
47

48 The duration of the treatment will be the usual for the infection you suffer from  
49 (between 7 and 14 days).  
50  
51

52 After completing at least 5 days of intravenous treatment, your physician will decide  
53 whether it is possible to switch from intravenous (vein) to oral (mouth) medication.  
54  
55

56 During the study, the research staff will carry out a series of visits. The day the  
57 antibiotic treatment ends (if you are still in the hospital) and approximately one week  
58 after, a revision visit will be conducted. We will phone you to check how you feel,  
59 approximately 30 days after the antibiotic treatment started.  
60

Then, after 60 days from the beginning of the treatment, you will have a new and final follow-up to see how you are feeling.

The number and type of analytical samples that we are going to collect are very similar to those of any patient with the same infection you are suffering from. At the beginning of the study and in some of the subsequent visits, we will take blood samples from you to evaluate how your infection is evolving.

In some centers, in order to assess the impact that the antibiotics could have on your intestinal flora, a rectal smear will be collected from you (a cotton swab is introduced in the anus, gently rotated and removed) at the moment you are included in the study, at the end-of-the-treatment visit, at the recovery-check visit, and at the 30<sup>th</sup> day visit. Agreeing to have a rectal smear performed is not required to be able to participate in the rest of the study. Your GP will tell you if this part of the study is carried out in your hospital.

We only ask you to indicate here if you agree to have a rectal smear collected from you:

I ACCEPT

I DO NOT ACCEPT

### HOW CAN YOU BENEFIT FROM THIS?

If the hypothesis is proven correct, this trial will help improve the antibiotic treatment of patients who have the same type of infections that you have, which will prevent them from receiving antibiotic treatments with spectra broader than the essential range. You may not get any benefit for your health from participating in this study; however, the data obtained from it could be very helpful for future patients that may find themselves in your current condition.

### WHAT ARE THE RISKS INVOLVED IN YOUR PARTICIPATION?

The treatments and the tests conducted in this study are part of the standard-of-care.

In the case of **participating women of childbearing age**, these must have a negative pregnancy test as a previous requirement to be included in the trial.

All the pharmaceuticals that will be used in this study have been approved by the Spanish Agency of Pharmaceuticals and Health Products, duly commercialized, and they are among the antibiotics that are used in the regular clinical practice.

Most of these antibiotics may present side effects of different severity. The adverse effects that you could suffer as a consequence of the administration of these

1  
2  
3  
4 pharmaceuticals include the following: digestive discomfort, skin eruption, allergic  
5 reactions, muscular discomfort, blood and hepatobiliary alterations, kidney problems  
6 (including kidney failure), and neurological alterations. In any case, the risk of suffering  
7 from any of these adverse effects as a consequence of your participation in this study  
8 is not higher than the risk you would have if you received the regular treatment  
9 established for your disease. Moreover, all the side effects or undesired episodes that  
10 take place during the study will be monitored and followed up; therefore, we ask you to  
11 let the physicians of the study know if you find any discomfort or other new find.  
12  
13  
14

15  
16 In addition to these effects, blood draw and the intravenous administration of  
17 pharmaceuticals could cause pain or hematomas at the puncture site, among other  
18 things.  
19

## 20 **INSURANCE**

21  
22  
23 The sponsor of this study has an insurance policy with Zurich Insurance PLC  
24 (insurance number: 00000084548718), which complies with the current legislation and  
25 will provide you with a compensation in case your health is impaired or if you suffer  
26 from lesions that could result from your participation in the study.  
27  
28

## 29 **CONFIDENTIALITY**

30  
31  
32 The treatment, communication and transfer of the personal data of all the participating  
33 subjects will comply with the Organic Law 15/1999, of December 13<sup>th</sup>, on personal data  
34 protection, and the Royal Decree 1720/2007, of December 21<sup>st</sup>, by which the  
35 development Regulation of such law is approved. According to what is established by  
36 the mentioned legislation, you have the right to access, modify, oppose and cancel  
37 data, for which you will have to refer to your study physician.  
38  
39

40  
41 The data collected for the study will be identified through a code and only your study  
42 GP/collaborators will be able to relate such data with you and your medical history.  
43 Therefore, your identity will not be revealed to anybody, except in some cases, such as  
44 a medical emergency or legal requirement.  
45  
46

47  
48 Access to your personal information will be limited to the study physician/collaborators,  
49 health authorities (Spanish Agency of Pharmaceuticals and Health Products), the  
50 Ethics Committee of Clinical Research and the staff authorized by the sponsor, when  
51 they need it to check the data and the procedures of the study, but always  
52 confidentially, complying with the current legislation.  
53  
54

55  
56 The results of the study will be presented in scientific meetings, medical conferences  
57 and scientific publications; however, the identity of the participating patients will be kept  
58 strictly confidential.  
59  
60

## FINANCIAL COMPENSATION

The sponsor is in charge of managing the funding of the study. For the realization of the study, the sponsor has signed a contract with the center in which it will be carried out and with the study physician, who in this case will not receive any financial compensation.

Your participation in the study will not incur any extraordinary cost for you for the pharmaceuticals used in the study.

## OTHER RELEVANT INFORMATION

Any new information about the pharmaceuticals used in the study and other information that could affect your availability to participate in the study, which may be discovered during your participation, will be given to you by your GP as soon as possible.

If you decide to cancel your consent to participate in this study, no new data will be added to the database, and you can also request the destruction of all the identifiable samples, previously retained, to avoid the realization of new analyses.

You must also know that you may be excluded from the study if the sponsor and the researchers consider it appropriate to do so, either for safety reasons, any adverse event caused by the study medication or because they consider that you are not complying with the established procedures. In any of these cases, you will receive an appropriate explanation for the reason that caused your dismissal from the study.

By signing the attached consent form, you agree to comply with the study procedures that have been explained to you. When your participation in this study is over, you will receive the best treatment available, which will also be the one that your GP considers most appropriate for your disease.

## QUESTIONS

If you have any questions related to the study or the disease, do not hesitate to tell your physician or his/her team. You can contact Dr. \_\_\_\_\_ through the following phone number: \_\_\_\_\_.

They will be willing to answer all your questions before, during and after the study.

---

## INFORMED CONSENT OF THE PATIENT

**Name of the study:** Phase III randomized, multi-center, open-label, controlled clinical trial to demonstrate the non-inferiority of the narrow-spectrum directed antibiotic therapy versus a broad-spectrum antipseudomonal beta-lactam therapy in the treatment of patients with Enterobacter bacteremia.

I, \_\_\_\_\_  
(Full name of the patient, hand written by him/herself, in capital letters)

- I have read and understood the information sheet about the study
- I was able to ask questions about the study and these were answered
- I spoke with (Name of the researcher) .....
- I understand that my participation is voluntary
- I understand that I can leave the study:
  - at any time
  - with no questions asked
  - without my decision affecting my medical care

I authorize the use of my personal data for the realization of this study, according to the information sheet.

I freely agree to participate in the study.

\_\_\_\_\_  
Patient's signature

\_\_\_\_\_  
Date (dd/mm/yy)

\_\_\_\_\_  
Patient's name

\_\_\_\_\_  
Researcher's signature

\_\_\_\_\_  
Date (dd/mm/yy)

\_\_\_\_\_  
Researcher's name

---

## INFORMED CONSENT OF THE LEGAL REPRESENTATIVE OF THE CONSENTIMIENTO INFORMADO DEL REPRESENTANTE LEGAL

**Name of the study:** Phase III randomized, multi-center, open-label, controlled clinical trial to demonstrate the non-inferiority of the narrow-spectrum directed antibiotic therapy versus a broad-spectrum antipseudomonal beta-lactam therapy in the treatment of patients with Enterobacter bacteremia.

I (name and surname of the representative) \_\_\_\_\_,  
as \_\_\_\_\_ (specify the relation with the patient) of \_\_\_\_\_  
\_\_\_\_\_ (name of the patient).

### DECLARE THAT:

- I have read the informative document attached to this consent form (the information sheet is for the patient) (please, keep a copy for yourself)
- I was able to ask questions about the study
- I received enough information about the study. I spoke with the informing health professional: (name of the researcher) \_\_\_\_\_
- I understand that participation is voluntary and that the patient can leave the study
- at any time
  - with no questions asked
  - without that affecting his/her future medical care

IN MY PRESENCE, (name of the patient) \_\_\_\_\_  
was given all the pertinent information adapted to his/her level of understanding and he/she agrees to participate; thereby, I GIVE MY CONSENT for him/her to participate in the study.

---

Legal/family representative's signature

Date (dd/mm/yy)

---

Legal/family representative's name

---

Researcher's signature

Date (dd/mm/yy)

---

Researcher's name

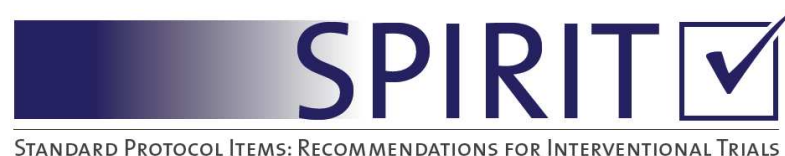

SPIRIT 2013 Checklist: Recommended items to address in a clinical trial protocol and related documents\*

| Section/item                      | Item No | Description                                                                                                                                                                                                                                                                              | Addressed on page number |
|-----------------------------------|---------|------------------------------------------------------------------------------------------------------------------------------------------------------------------------------------------------------------------------------------------------------------------------------------------|--------------------------|
| <b>Administrative information</b> |         |                                                                                                                                                                                                                                                                                          |                          |
| Title                             | 1       | Descriptive title identifying the study design, population, interventions, and, if applicable, trial acronym                                                                                                                                                                             | Page 1                   |
| Trial registration                | 2a      | Trial identifier and registry name. If not yet registered, name of intended registry                                                                                                                                                                                                     | Page 3                   |
|                                   | 2b      | All items from the World Health Organization Trial Registration Data Set                                                                                                                                                                                                                 | Page 3                   |
| Protocol version                  | 3       | Date and version identifier                                                                                                                                                                                                                                                              | Page 3                   |
| Funding                           | 4       | Sources and types of financial, material, and other support                                                                                                                                                                                                                              | Pages 24 and 25          |
| Roles and responsibilities        | 5a      | Names, affiliations, and roles of protocol contributors                                                                                                                                                                                                                                  | Pages 1 and 26           |
|                                   | 5b      | Name and contact information for the trial sponsor                                                                                                                                                                                                                                       | Page 25                  |
|                                   | 5c      | Role of study sponsor and funders, if any, in study design; collection, management, analysis, and interpretation of data; writing of the report; and the decision to submit the report for publication, including whether they will have ultimate authority over any of these activities | Page 25                  |
|                                   | 5d      | Composition, roles, and responsibilities of the coordinating centre, steering committee, endpoint adjudication committee, data management team, and other individuals or groups overseeing the trial, if applicable (see Item 21a for data monitoring committee)                         | Pages 16,17 and 26       |

## Introduction

|                          |    |                                                                                                                                                                                                            |               |
|--------------------------|----|------------------------------------------------------------------------------------------------------------------------------------------------------------------------------------------------------------|---------------|
| Background and rationale | 6a | Description of research question and justification for undertaking the trial, including summary of relevant studies (published and unpublished) examining benefits and harms for each intervention         | Pages 5 and 6 |
|                          | 6b | Explanation for choice of comparators                                                                                                                                                                      | Page 5        |
| Objectives               | 7  | Specific objectives or hypotheses                                                                                                                                                                          | Page 6        |
| Trial design             | 8  | Description of trial design including type of trial (eg, parallel group, crossover, factorial, single group), allocation ratio, and framework (eg, superiority, equivalence, non-inferiority, exploratory) | Page 6        |

## Methods: Participants, interventions, and outcomes

|                      |     |                                                                                                                                                                                                                                                                                                                                                                                |                      |
|----------------------|-----|--------------------------------------------------------------------------------------------------------------------------------------------------------------------------------------------------------------------------------------------------------------------------------------------------------------------------------------------------------------------------------|----------------------|
| Study setting        | 9   | Description of study settings (eg, community clinic, academic hospital) and list of countries where data will be collected. Reference to where list of study sites can be obtained                                                                                                                                                                                             | Page 7               |
| Eligibility criteria | 10  | Inclusion and exclusion criteria for participants. If applicable, eligibility criteria for study centres and individuals who will perform the interventions (eg, surgeons, psychotherapists)                                                                                                                                                                                   | Pages 7 and 8        |
| Interventions        | 11a | Interventions for each group with sufficient detail to allow replication, including how and when they will be administered                                                                                                                                                                                                                                                     | Pages 9 to 12        |
|                      | 11b | Criteria for discontinuing or modifying allocated interventions for a given trial participant (eg, drug dose change in response to harms, participant request, or improving/worsening disease)                                                                                                                                                                                 | Page 12              |
|                      | 11c | Strategies to improve adherence to intervention protocols, and any procedures for monitoring adherence (eg, drug tablet return, laboratory tests)                                                                                                                                                                                                                              | NA                   |
|                      | 11d | Relevant concomitant care and interventions that are permitted or prohibited during the trial                                                                                                                                                                                                                                                                                  | Pages 10 to 12       |
| Outcomes             | 12  | Primary, secondary, and other outcomes, including the specific measurement variable (eg, systolic blood pressure), analysis metric (eg, change from baseline, final value, time to event), method of aggregation (eg, median, proportion), and time point for each outcome. Explanation of the clinical relevance of chosen efficacy and harm outcomes is strongly recommended | Pages 13 to 17       |
| Participant timeline | 13  | Time schedule of enrolment, interventions (including any run-ins and washouts), assessments, and visits for participants. A schematic diagram is highly recommended (see Figure)                                                                                                                                                                                               | Page 13 and Figure 2 |



|   |             |    |                                                                                                                                                                                       |         |
|---|-------------|----|---------------------------------------------------------------------------------------------------------------------------------------------------------------------------------------|---------|
| 1 |             |    |                                                                                                                                                                                       |         |
| 2 |             |    |                                                                                                                                                                                       |         |
| 3 | Sample size | 14 | Estimated number of participants needed to achieve study objectives and how it was determined, including clinical and statistical assumptions supporting any sample size calculations | Page 19 |
| 4 |             |    |                                                                                                                                                                                       |         |
| 5 |             |    |                                                                                                                                                                                       |         |
| 6 | Recruitment | 15 | Strategies for achieving adequate participant enrolment to reach target sample size                                                                                                   | N/A     |
| 7 |             |    |                                                                                                                                                                                       |         |

### 8 **Methods: Assignment of interventions (for controlled trials)**

#### 9 Allocation:

|    |                                  |     |                                                                                                                                                                                                                                                                                                                                                          |               |
|----|----------------------------------|-----|----------------------------------------------------------------------------------------------------------------------------------------------------------------------------------------------------------------------------------------------------------------------------------------------------------------------------------------------------------|---------------|
| 10 |                                  |     |                                                                                                                                                                                                                                                                                                                                                          |               |
| 11 |                                  |     |                                                                                                                                                                                                                                                                                                                                                          |               |
| 12 | Sequence generation              | 16a | Method of generating the allocation sequence (eg, computer-generated random numbers), and list of any factors for stratification. To reduce predictability of a random sequence, details of any planned restriction (eg, blocking) should be provided in a separate document that is unavailable to those who enrol participants or assign interventions | Pages 8 and 9 |
| 13 |                                  |     |                                                                                                                                                                                                                                                                                                                                                          |               |
| 14 |                                  |     |                                                                                                                                                                                                                                                                                                                                                          |               |
| 15 |                                  |     |                                                                                                                                                                                                                                                                                                                                                          |               |
| 16 |                                  |     |                                                                                                                                                                                                                                                                                                                                                          |               |
| 17 |                                  |     |                                                                                                                                                                                                                                                                                                                                                          |               |
| 18 | Allocation concealment mechanism | 16b | Mechanism of implementing the allocation sequence (eg, central telephone; sequentially numbered, opaque, sealed envelopes), describing any steps to conceal the sequence until interventions are assigned                                                                                                                                                | Pages 8 and 9 |
| 19 |                                  |     |                                                                                                                                                                                                                                                                                                                                                          |               |
| 20 |                                  |     |                                                                                                                                                                                                                                                                                                                                                          |               |
| 21 |                                  |     |                                                                                                                                                                                                                                                                                                                                                          |               |
| 22 | Implementation                   | 16c | Who will generate the allocation sequence, who will enrol participants, and who will assign participants to interventions                                                                                                                                                                                                                                | Page 8        |
| 23 |                                  |     |                                                                                                                                                                                                                                                                                                                                                          |               |
| 24 |                                  |     |                                                                                                                                                                                                                                                                                                                                                          |               |
| 25 | Blinding (masking)               | 17a | Who will be blinded after assignment to interventions (eg, trial participants, care providers, outcome assessors, data analysts), and how                                                                                                                                                                                                                | N/A           |
| 26 |                                  |     |                                                                                                                                                                                                                                                                                                                                                          |               |
| 27 |                                  |     |                                                                                                                                                                                                                                                                                                                                                          |               |
| 28 |                                  | 17b | If blinded, circumstances under which unblinding is permissible, and procedure for revealing a participant's allocated intervention during the trial                                                                                                                                                                                                     | N/A           |
| 29 |                                  |     |                                                                                                                                                                                                                                                                                                                                                          |               |
| 30 |                                  |     |                                                                                                                                                                                                                                                                                                                                                          |               |
| 31 |                                  |     |                                                                                                                                                                                                                                                                                                                                                          |               |

### 32 **Methods: Data collection, management, and analysis**

|    |                         |     |                                                                                                                                                                                                                                                                                                                                                                                                              |                 |
|----|-------------------------|-----|--------------------------------------------------------------------------------------------------------------------------------------------------------------------------------------------------------------------------------------------------------------------------------------------------------------------------------------------------------------------------------------------------------------|-----------------|
| 33 |                         |     |                                                                                                                                                                                                                                                                                                                                                                                                              |                 |
| 34 | Data collection methods | 18a | Plans for assessment and collection of outcome, baseline, and other trial data, including any related processes to promote data quality (eg, duplicate measurements, training of assessors) and a description of study instruments (eg, questionnaires, laboratory tests) along with their reliability and validity, if known. Reference to where data collection forms can be found, if not in the protocol | Page 17         |
| 35 |                         |     |                                                                                                                                                                                                                                                                                                                                                                                                              |                 |
| 36 |                         |     |                                                                                                                                                                                                                                                                                                                                                                                                              |                 |
| 37 |                         |     |                                                                                                                                                                                                                                                                                                                                                                                                              |                 |
| 38 |                         |     |                                                                                                                                                                                                                                                                                                                                                                                                              |                 |
| 39 |                         | 18b | Plans to promote participant retention and complete follow-up, including list of any outcome data to be collected for participants who discontinue or deviate from intervention protocols                                                                                                                                                                                                                    | Pages 16 and 17 |
| 40 |                         |     |                                                                                                                                                                                                                                                                                                                                                                                                              |                 |
| 41 |                         |     |                                                                                                                                                                                                                                                                                                                                                                                                              |                 |
| 42 |                         |     |                                                                                                                                                                                                                                                                                                                                                                                                              |                 |
| 43 |                         |     |                                                                                                                                                                                                                                                                                                                                                                                                              |                 |
| 44 |                         |     |                                                                                                                                                                                                                                                                                                                                                                                                              |                 |
| 45 |                         |     |                                                                                                                                                                                                                                                                                                                                                                                                              |                 |

|    |                     |     |                                                                                                                                                                                                                                                                   |                              |
|----|---------------------|-----|-------------------------------------------------------------------------------------------------------------------------------------------------------------------------------------------------------------------------------------------------------------------|------------------------------|
| 1  |                     |     |                                                                                                                                                                                                                                                                   |                              |
| 2  |                     |     |                                                                                                                                                                                                                                                                   |                              |
| 3  | Data management     | 19  | Plans for data entry, coding, security, and storage, including any related processes to promote data quality (eg, double data entry; range checks for data values). Reference to where details of data management procedures can be found, if not in the protocol | <i>Pages 17 and 18</i>       |
| 4  |                     |     |                                                                                                                                                                                                                                                                   |                              |
| 5  |                     |     |                                                                                                                                                                                                                                                                   |                              |
| 6  |                     |     |                                                                                                                                                                                                                                                                   |                              |
| 7  | Statistical methods | 20a | Statistical methods for analysing primary and secondary outcomes. Reference to where other details of the statistical analysis plan can be found, if not in the protocol                                                                                          | <i>Pages 13,14,19 and 20</i> |
| 8  |                     |     |                                                                                                                                                                                                                                                                   |                              |
| 9  |                     |     |                                                                                                                                                                                                                                                                   |                              |
| 10 |                     | 20b | Methods for any additional analyses (eg, subgroup and adjusted analyses)                                                                                                                                                                                          | <i>Pages 13,14,19 and 20</i> |
| 11 |                     |     |                                                                                                                                                                                                                                                                   |                              |
| 12 |                     | 20c | Definition of analysis population relating to protocol non-adherence (eg, as randomised analysis), and any statistical methods to handle missing data (eg, multiple imputation)                                                                                   | <i>Pages 18 and 19</i>       |
| 13 |                     |     |                                                                                                                                                                                                                                                                   |                              |
| 14 |                     |     |                                                                                                                                                                                                                                                                   |                              |
| 15 |                     |     |                                                                                                                                                                                                                                                                   |                              |

### 16 **Methods: Monitoring**

|    |                 |     |                                                                                                                                                                                                                                                                                                                                       |                        |
|----|-----------------|-----|---------------------------------------------------------------------------------------------------------------------------------------------------------------------------------------------------------------------------------------------------------------------------------------------------------------------------------------|------------------------|
| 17 |                 |     |                                                                                                                                                                                                                                                                                                                                       |                        |
| 18 | Data monitoring | 21a | Composition of data monitoring committee (DMC); summary of its role and reporting structure; statement of whether it is independent from the sponsor and competing interests; and reference to where further details about its charter can be found, if not in the protocol. Alternatively, an explanation of why a DMC is not needed | <i>Pages 16 and 17</i> |
| 19 |                 |     |                                                                                                                                                                                                                                                                                                                                       |                        |
| 20 |                 |     |                                                                                                                                                                                                                                                                                                                                       |                        |
| 21 |                 |     |                                                                                                                                                                                                                                                                                                                                       |                        |
| 22 |                 |     |                                                                                                                                                                                                                                                                                                                                       |                        |
| 23 |                 | 21b | Description of any interim analyses and stopping guidelines, including who will have access to these interim results and make the final decision to terminate the trial                                                                                                                                                               | <i>Pages 17 to 19</i>  |
| 24 |                 |     |                                                                                                                                                                                                                                                                                                                                       |                        |
| 25 |                 |     |                                                                                                                                                                                                                                                                                                                                       |                        |
| 26 | Harms           | 22  | Plans for collecting, assessing, reporting, and managing solicited and spontaneously reported adverse events and other unintended effects of trial interventions or trial conduct                                                                                                                                                     | <i>Page 16 and 19</i>  |
| 27 |                 |     |                                                                                                                                                                                                                                                                                                                                       |                        |
| 28 |                 |     |                                                                                                                                                                                                                                                                                                                                       |                        |
| 29 | Auditing        | 23  | Frequency and procedures for auditing trial conduct, if any, and whether the process will be independent from investigators and the sponsor                                                                                                                                                                                           | <i>Page 17</i>         |
| 30 |                 |     |                                                                                                                                                                                                                                                                                                                                       |                        |
| 31 |                 |     |                                                                                                                                                                                                                                                                                                                                       |                        |
| 32 |                 |     |                                                                                                                                                                                                                                                                                                                                       |                        |

### 33 **Ethics and dissemination**

|    |                          |    |                                                                                                                                                                                                                                  |                        |
|----|--------------------------|----|----------------------------------------------------------------------------------------------------------------------------------------------------------------------------------------------------------------------------------|------------------------|
| 34 |                          |    |                                                                                                                                                                                                                                  |                        |
| 35 | Research ethics approval | 24 | Plans for seeking research ethics committee/institutional review board (REC/IRB) approval                                                                                                                                        | <i>Pages 20 and 21</i> |
| 36 |                          |    |                                                                                                                                                                                                                                  |                        |
| 37 |                          |    |                                                                                                                                                                                                                                  |                        |
| 38 | Protocol amendments      | 25 | Plans for communicating important protocol modifications (eg, changes to eligibility criteria, outcomes, analyses) to relevant parties (eg, investigators, REC/IRBs, trial participants, trial registries, journals, regulators) | <i>Page 17</i>         |
| 39 |                          |    |                                                                                                                                                                                                                                  |                        |
| 40 |                          |    |                                                                                                                                                                                                                                  |                        |
| 41 |                          |    |                                                                                                                                                                                                                                  |                        |
| 42 |                          |    |                                                                                                                                                                                                                                  |                        |
| 43 |                          |    |                                                                                                                                                                                                                                  |                        |
| 44 |                          |    |                                                                                                                                                                                                                                  |                        |
| 45 |                          |    |                                                                                                                                                                                                                                  |                        |

|    |                               |     |                                                                                                                                                                                                                                                                                     |                 |
|----|-------------------------------|-----|-------------------------------------------------------------------------------------------------------------------------------------------------------------------------------------------------------------------------------------------------------------------------------------|-----------------|
| 1  |                               |     |                                                                                                                                                                                                                                                                                     |                 |
| 2  |                               |     |                                                                                                                                                                                                                                                                                     |                 |
| 3  | Consent or assent             | 26a | Who will obtain informed consent or assent from potential trial participants or authorised surrogates, and how (see Item 32)                                                                                                                                                        | Page 20         |
| 4  |                               |     |                                                                                                                                                                                                                                                                                     |                 |
| 5  |                               |     |                                                                                                                                                                                                                                                                                     |                 |
| 6  |                               | 26b | Additional consent provisions for collection and use of participant data and biological specimens in ancillary studies, if applicable                                                                                                                                               | Pages 18 and 20 |
| 7  |                               |     |                                                                                                                                                                                                                                                                                     |                 |
| 8  |                               |     |                                                                                                                                                                                                                                                                                     |                 |
| 9  | Confidentiality               | 27  | How personal information about potential and enrolled participants will be collected, shared, and maintained in order to protect confidentiality before, during, and after the trial                                                                                                | Pages 20 and 21 |
| 10 |                               |     |                                                                                                                                                                                                                                                                                     |                 |
| 11 |                               |     |                                                                                                                                                                                                                                                                                     |                 |
| 12 | Declaration of interests      | 28  | Financial and other competing interests for principal investigators for the overall trial and each study site                                                                                                                                                                       | Page 25         |
| 13 |                               |     |                                                                                                                                                                                                                                                                                     |                 |
| 14 |                               |     |                                                                                                                                                                                                                                                                                     |                 |
| 15 | Access to data                | 29  | Statement of who will have access to the final trial dataset, and disclosure of contractual agreements that limit such access for investigators                                                                                                                                     | Page 25         |
| 16 |                               |     |                                                                                                                                                                                                                                                                                     |                 |
| 17 |                               |     |                                                                                                                                                                                                                                                                                     |                 |
| 18 | Ancillary and post-trial care | 30  | Provisions, if any, for ancillary and post-trial care, and for compensation to those who suffer harm from trial participation                                                                                                                                                       | Pages 20 and 21 |
| 19 |                               |     |                                                                                                                                                                                                                                                                                     |                 |
| 20 |                               |     |                                                                                                                                                                                                                                                                                     |                 |
| 21 | Dissemination policy          | 31a | Plans for investigators and sponsor to communicate trial results to participants, healthcare professionals, the public, and other relevant groups (eg, via publication, reporting in results databases, or other data sharing arrangements), including any publication restrictions | Page 3 and 21   |
| 22 |                               |     |                                                                                                                                                                                                                                                                                     |                 |
| 23 |                               |     |                                                                                                                                                                                                                                                                                     |                 |
| 24 |                               |     |                                                                                                                                                                                                                                                                                     |                 |
| 25 |                               |     |                                                                                                                                                                                                                                                                                     |                 |
| 26 |                               | 31b | Authorship eligibility guidelines and any intended use of professional writers                                                                                                                                                                                                      | N/A             |
| 27 |                               |     |                                                                                                                                                                                                                                                                                     |                 |
| 28 |                               | 31c | Plans, if any, for granting public access to the full protocol, participant-level dataset, and statistical code                                                                                                                                                                     | N/A             |
| 29 |                               |     |                                                                                                                                                                                                                                                                                     |                 |
| 30 | <b>Appendices</b>             |     |                                                                                                                                                                                                                                                                                     |                 |
| 31 |                               |     |                                                                                                                                                                                                                                                                                     |                 |
| 32 | Informed consent materials    | 32  | Model consent form and other related documentation given to participants and authorised surrogates                                                                                                                                                                                  | Annex 1         |
| 33 |                               |     |                                                                                                                                                                                                                                                                                     |                 |
| 34 |                               |     |                                                                                                                                                                                                                                                                                     |                 |
| 35 | Biological specimens          | 33  | Plans for collection, laboratory evaluation, and storage of biological specimens for genetic or molecular analysis in the current trial and for future use in ancillary studies, if applicable                                                                                      | N/A             |
| 36 |                               |     |                                                                                                                                                                                                                                                                                     |                 |
| 37 |                               |     |                                                                                                                                                                                                                                                                                     |                 |

38 \*It is strongly recommended that this checklist be read in conjunction with the SPIRIT 2013 Explanation & Elaboration for important clarification on the items.  
 39 Amendments to the protocol should be tracked and dated. The SPIRIT checklist is copyrighted by the SPIRIT Group under the Creative Commons  
 40 "[Attribution-NonCommercial-NoDerivs 3.0 Unported](https://creativecommons.org/licenses/by-nc-nd/3.0/)" license.  
 41
